# Supplementary figures and images for: Electronic and optical properties of graphene nanoribbons in external fields
Source: Royal Society of Chemistry journal article supplement (doi:10.1039/c5cp06533j), 2015-12-14

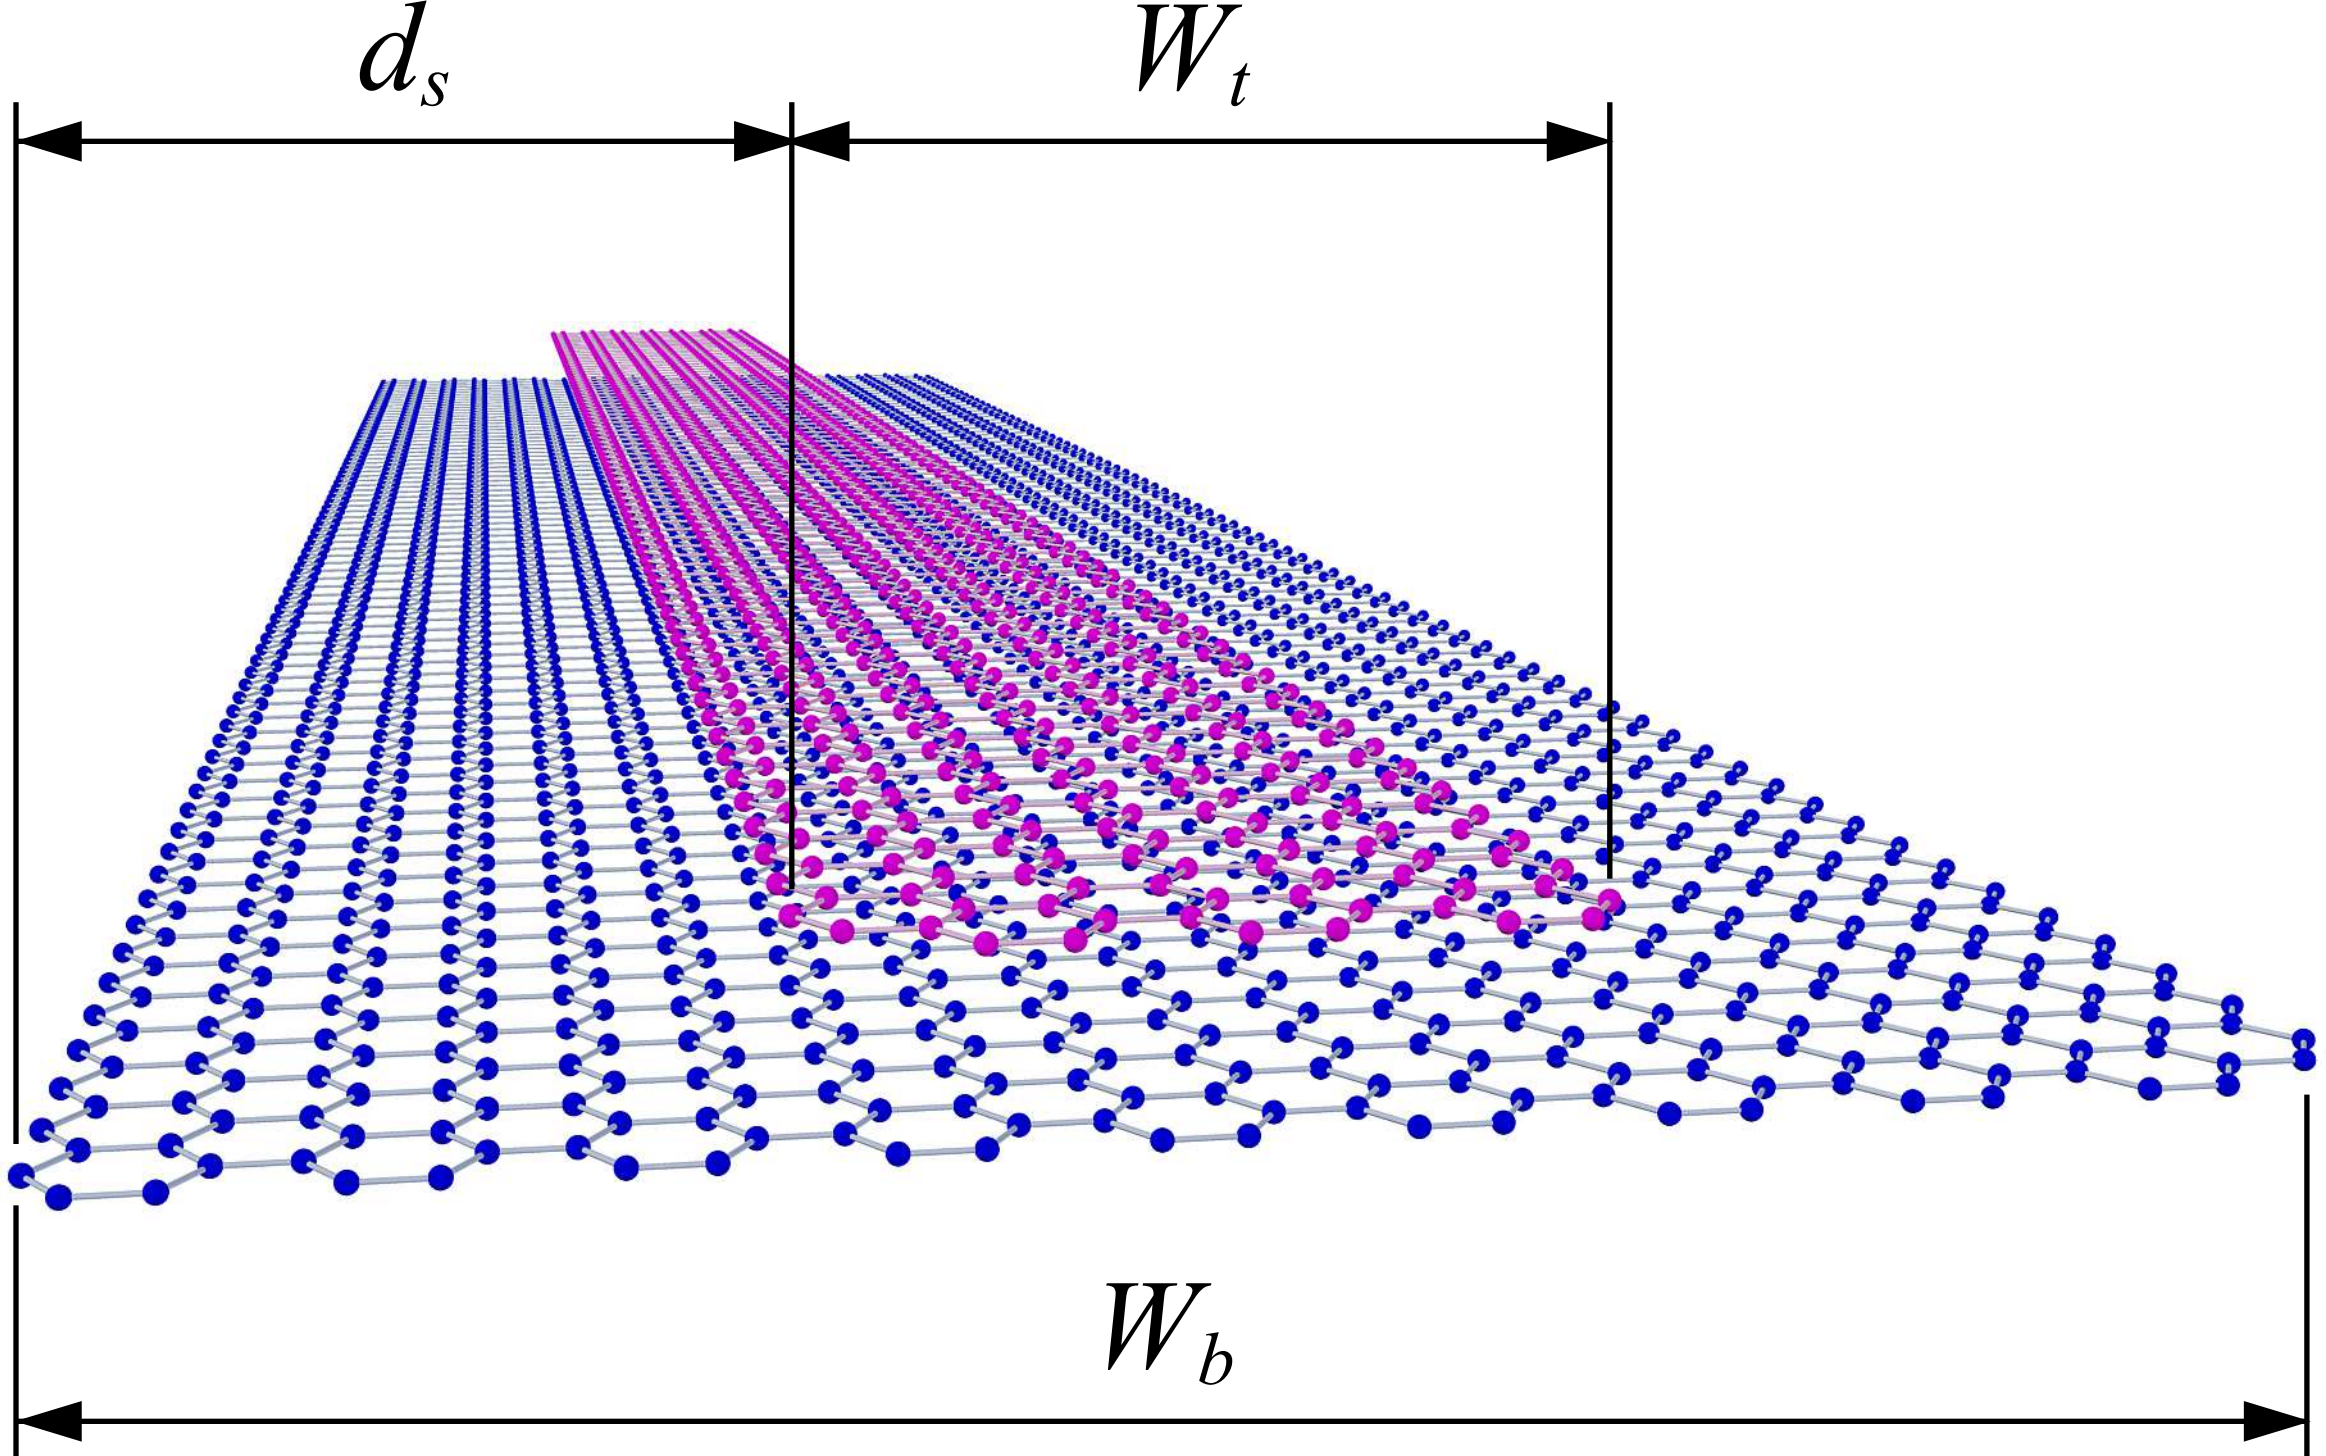

Supplement: c5cp06533j2.zip [file c5cp06533j2.zip]

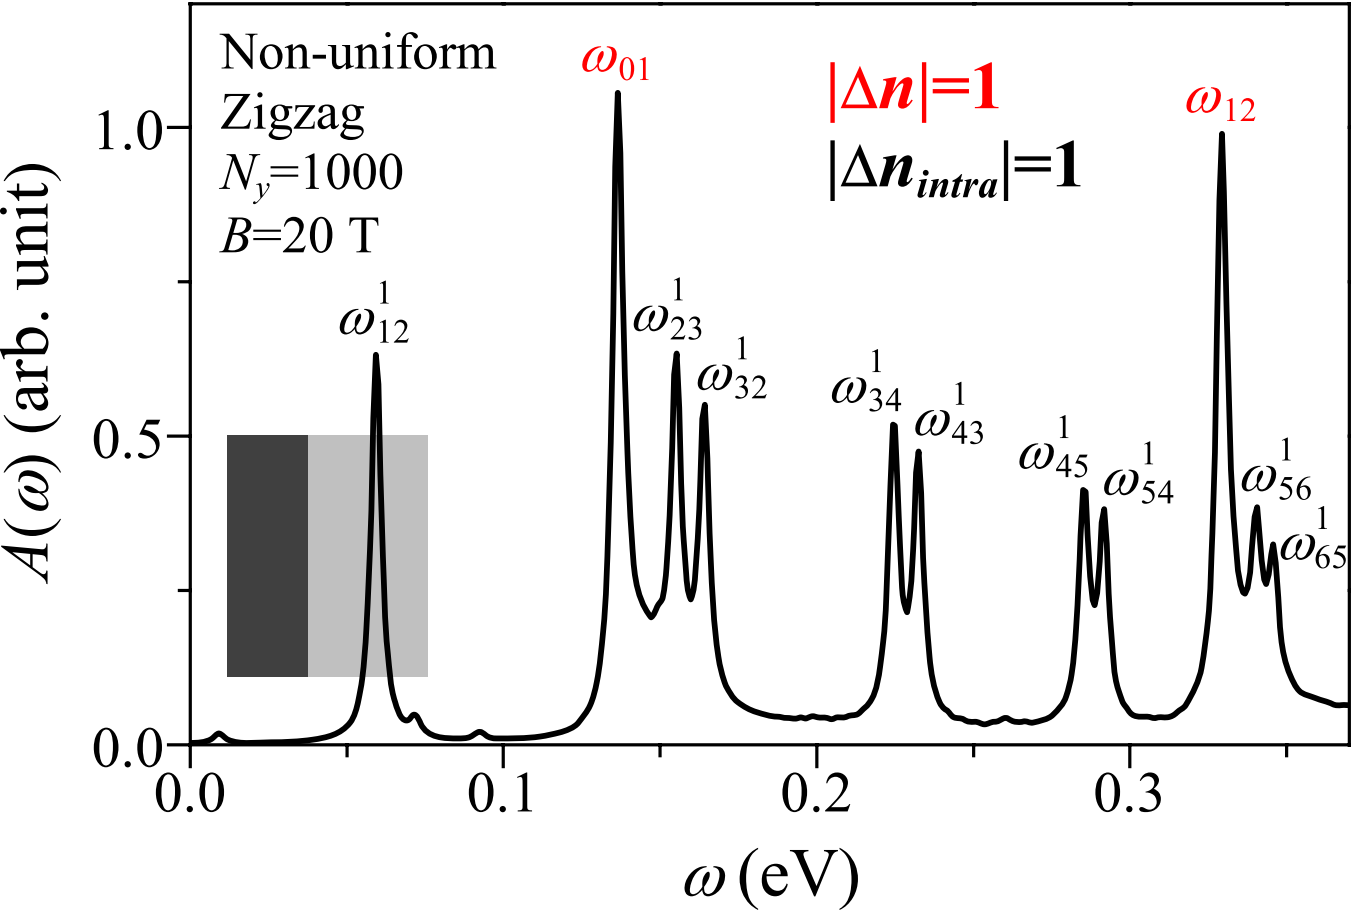

Supplement: c5cp06533j2.zip [file c5cp06533j2.zip]

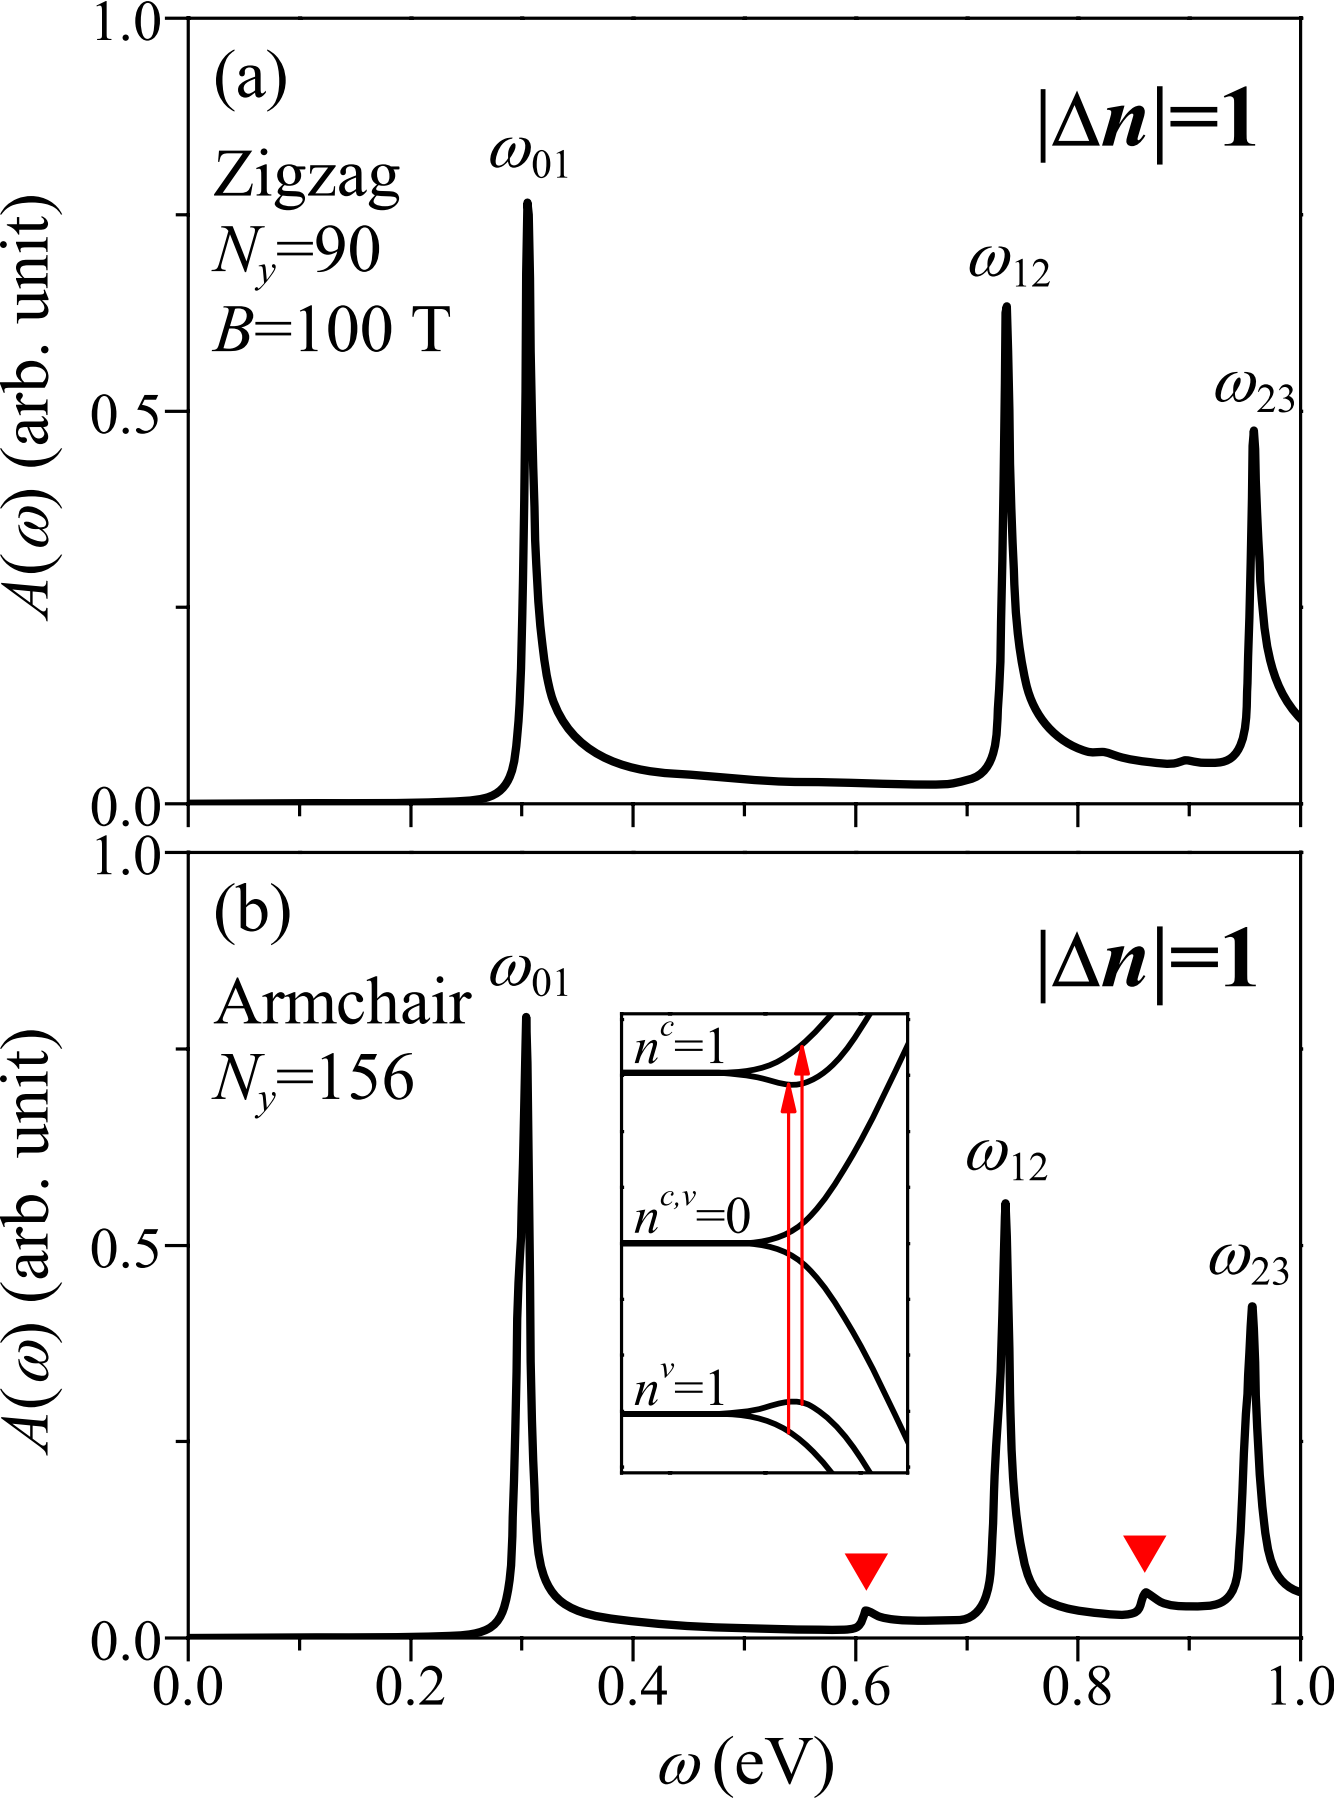

Supplement: c5cp06533j2.zip [file c5cp06533j2.zip]

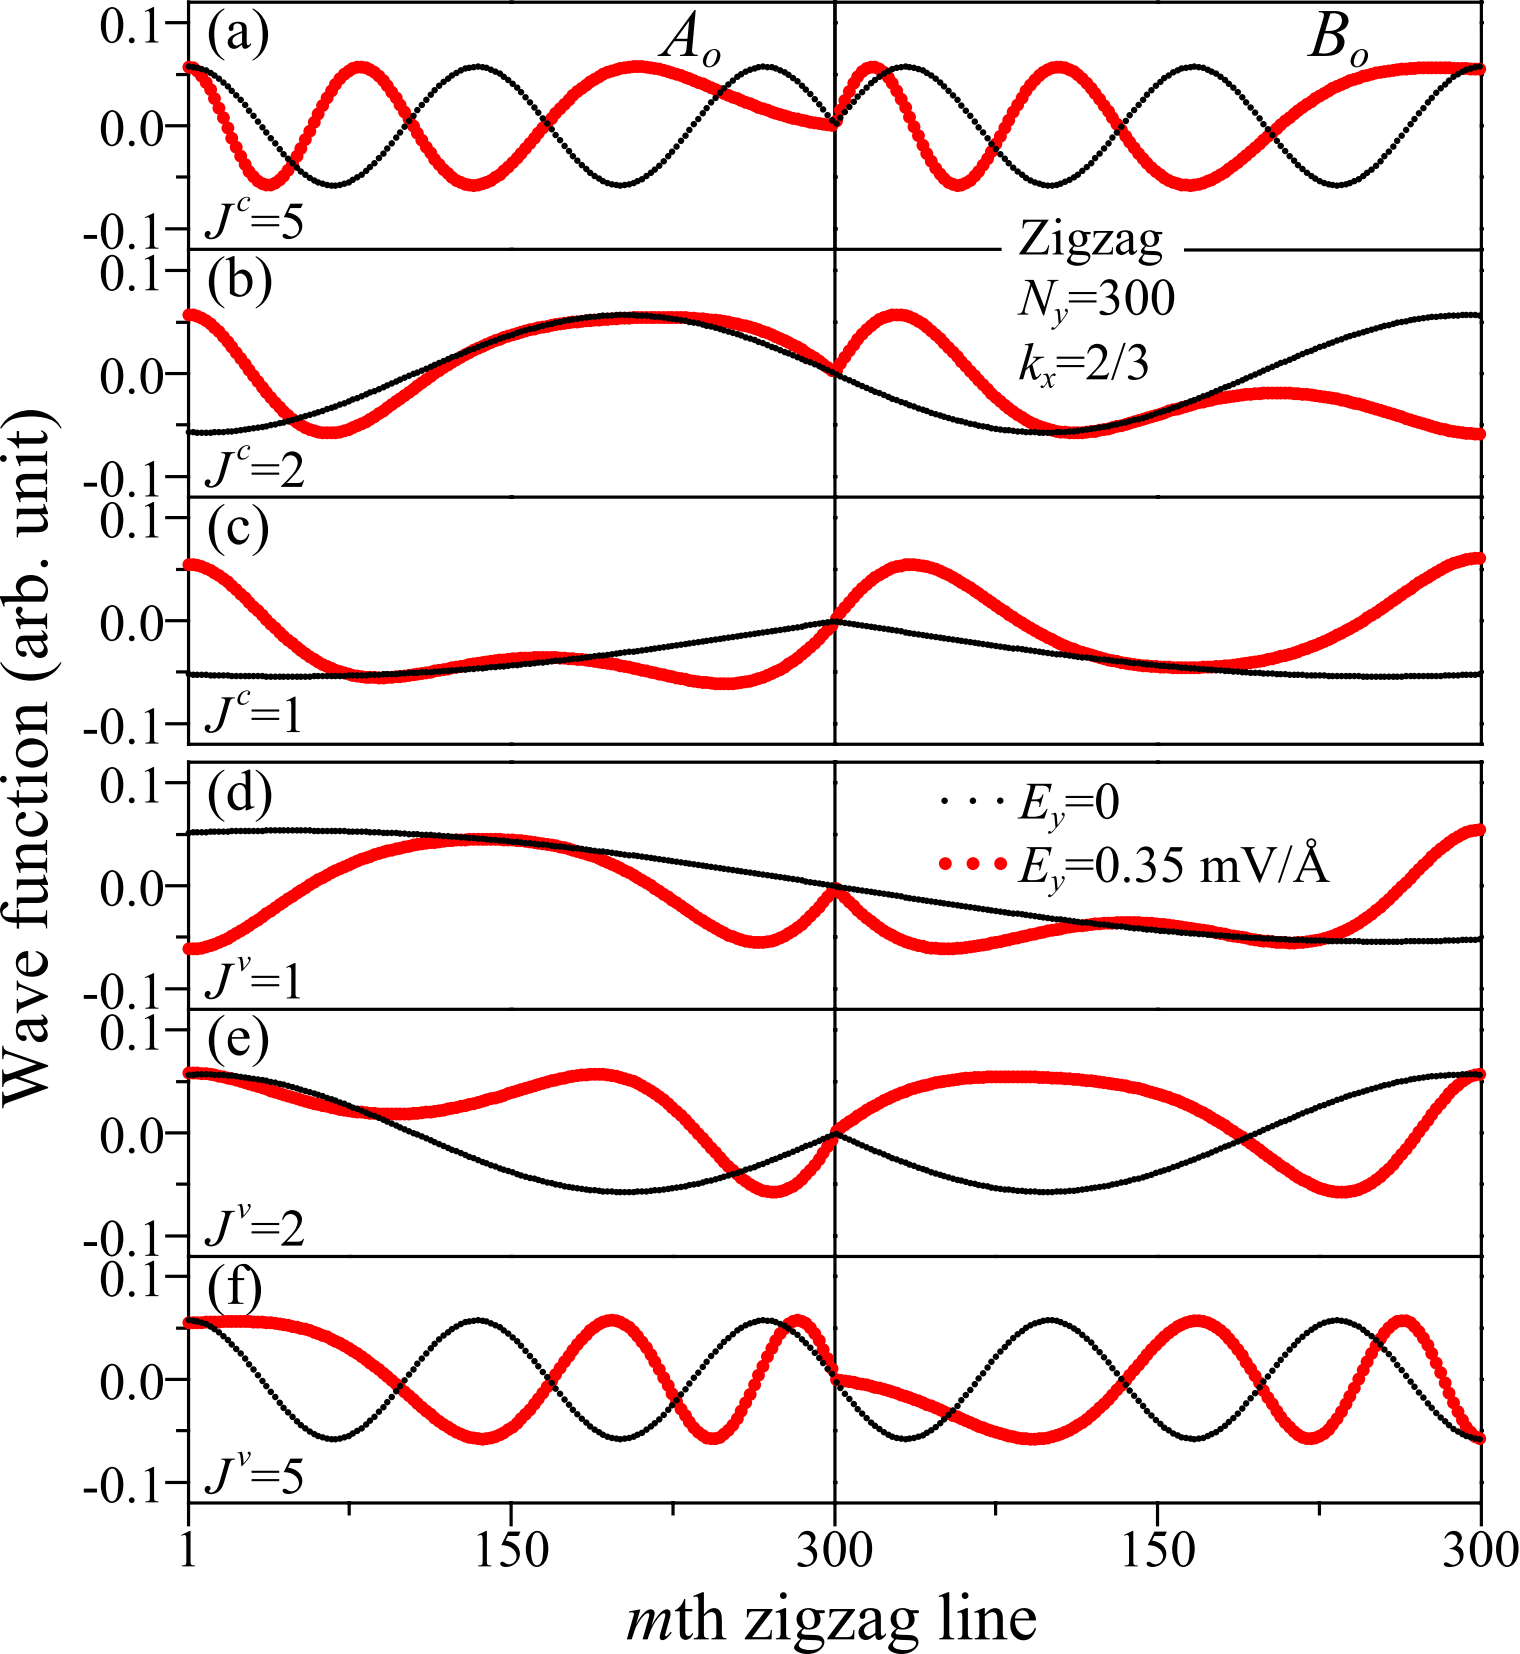

Supplement: c5cp06533j2.zip [file c5cp06533j2.zip]

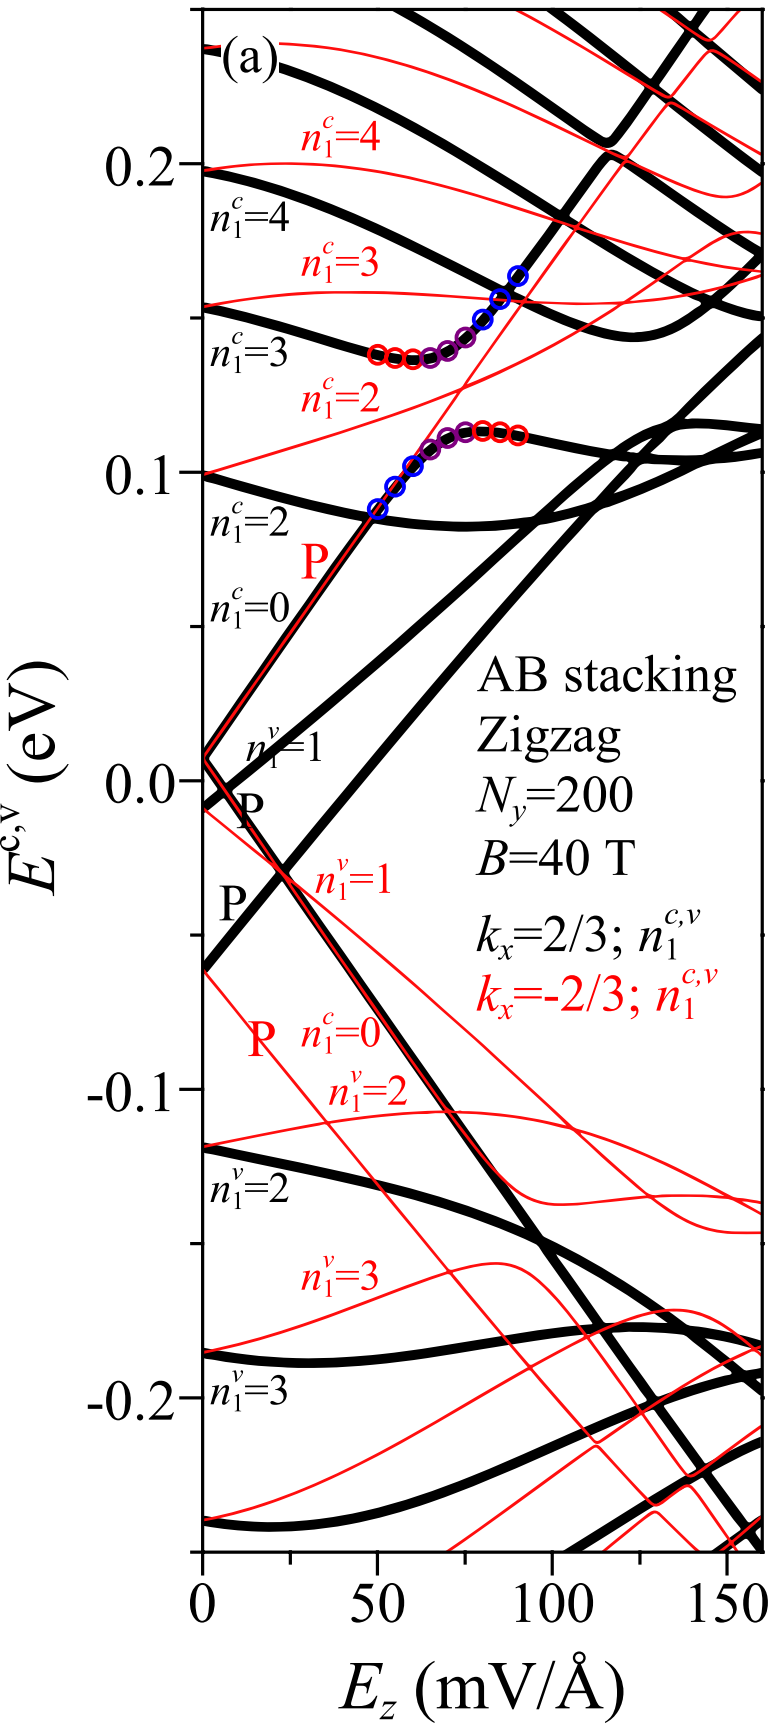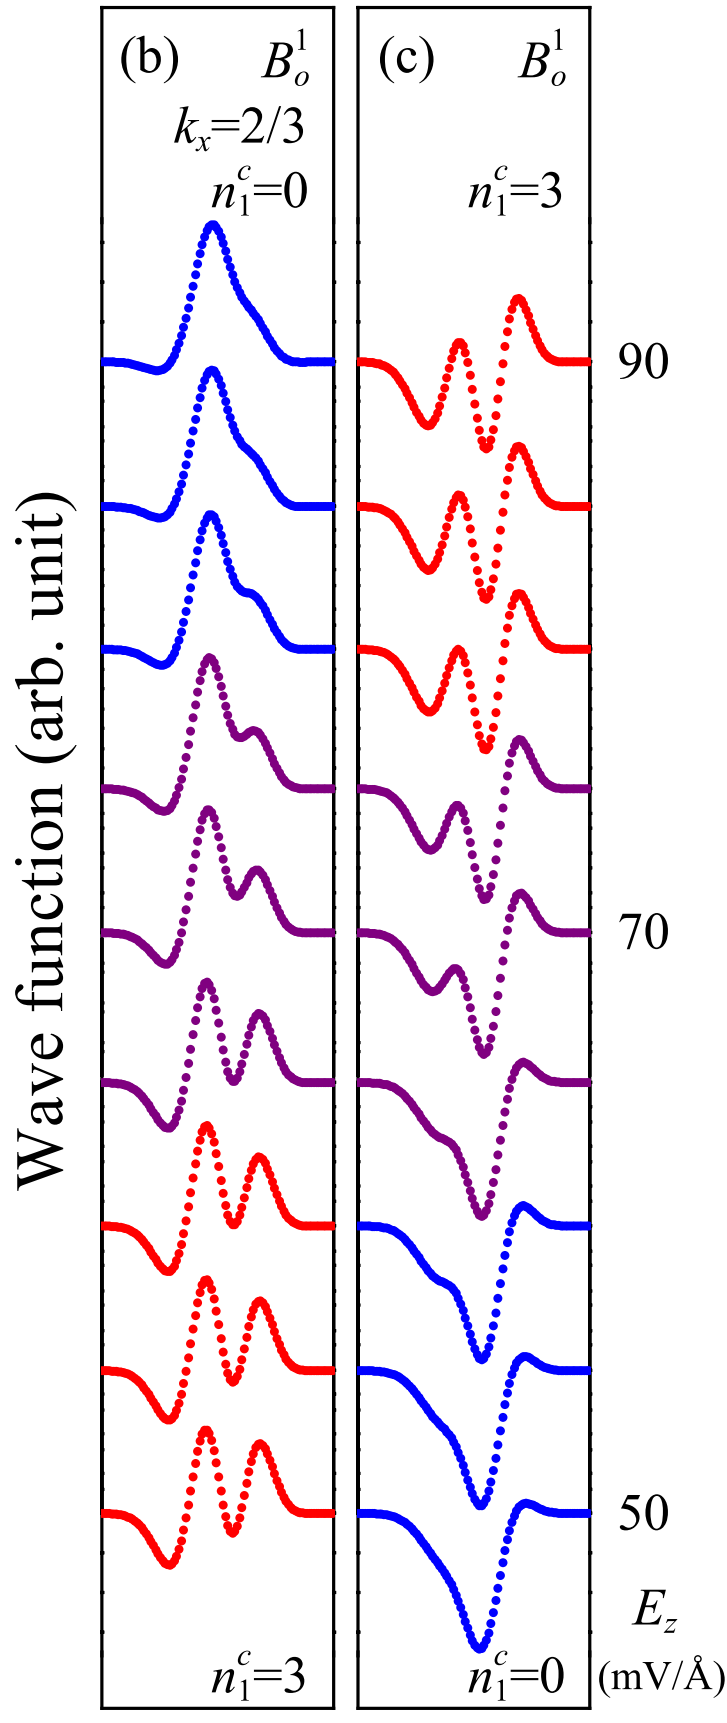

Supplement: c5cp06533j2.zip [file c5cp06533j2.zip]

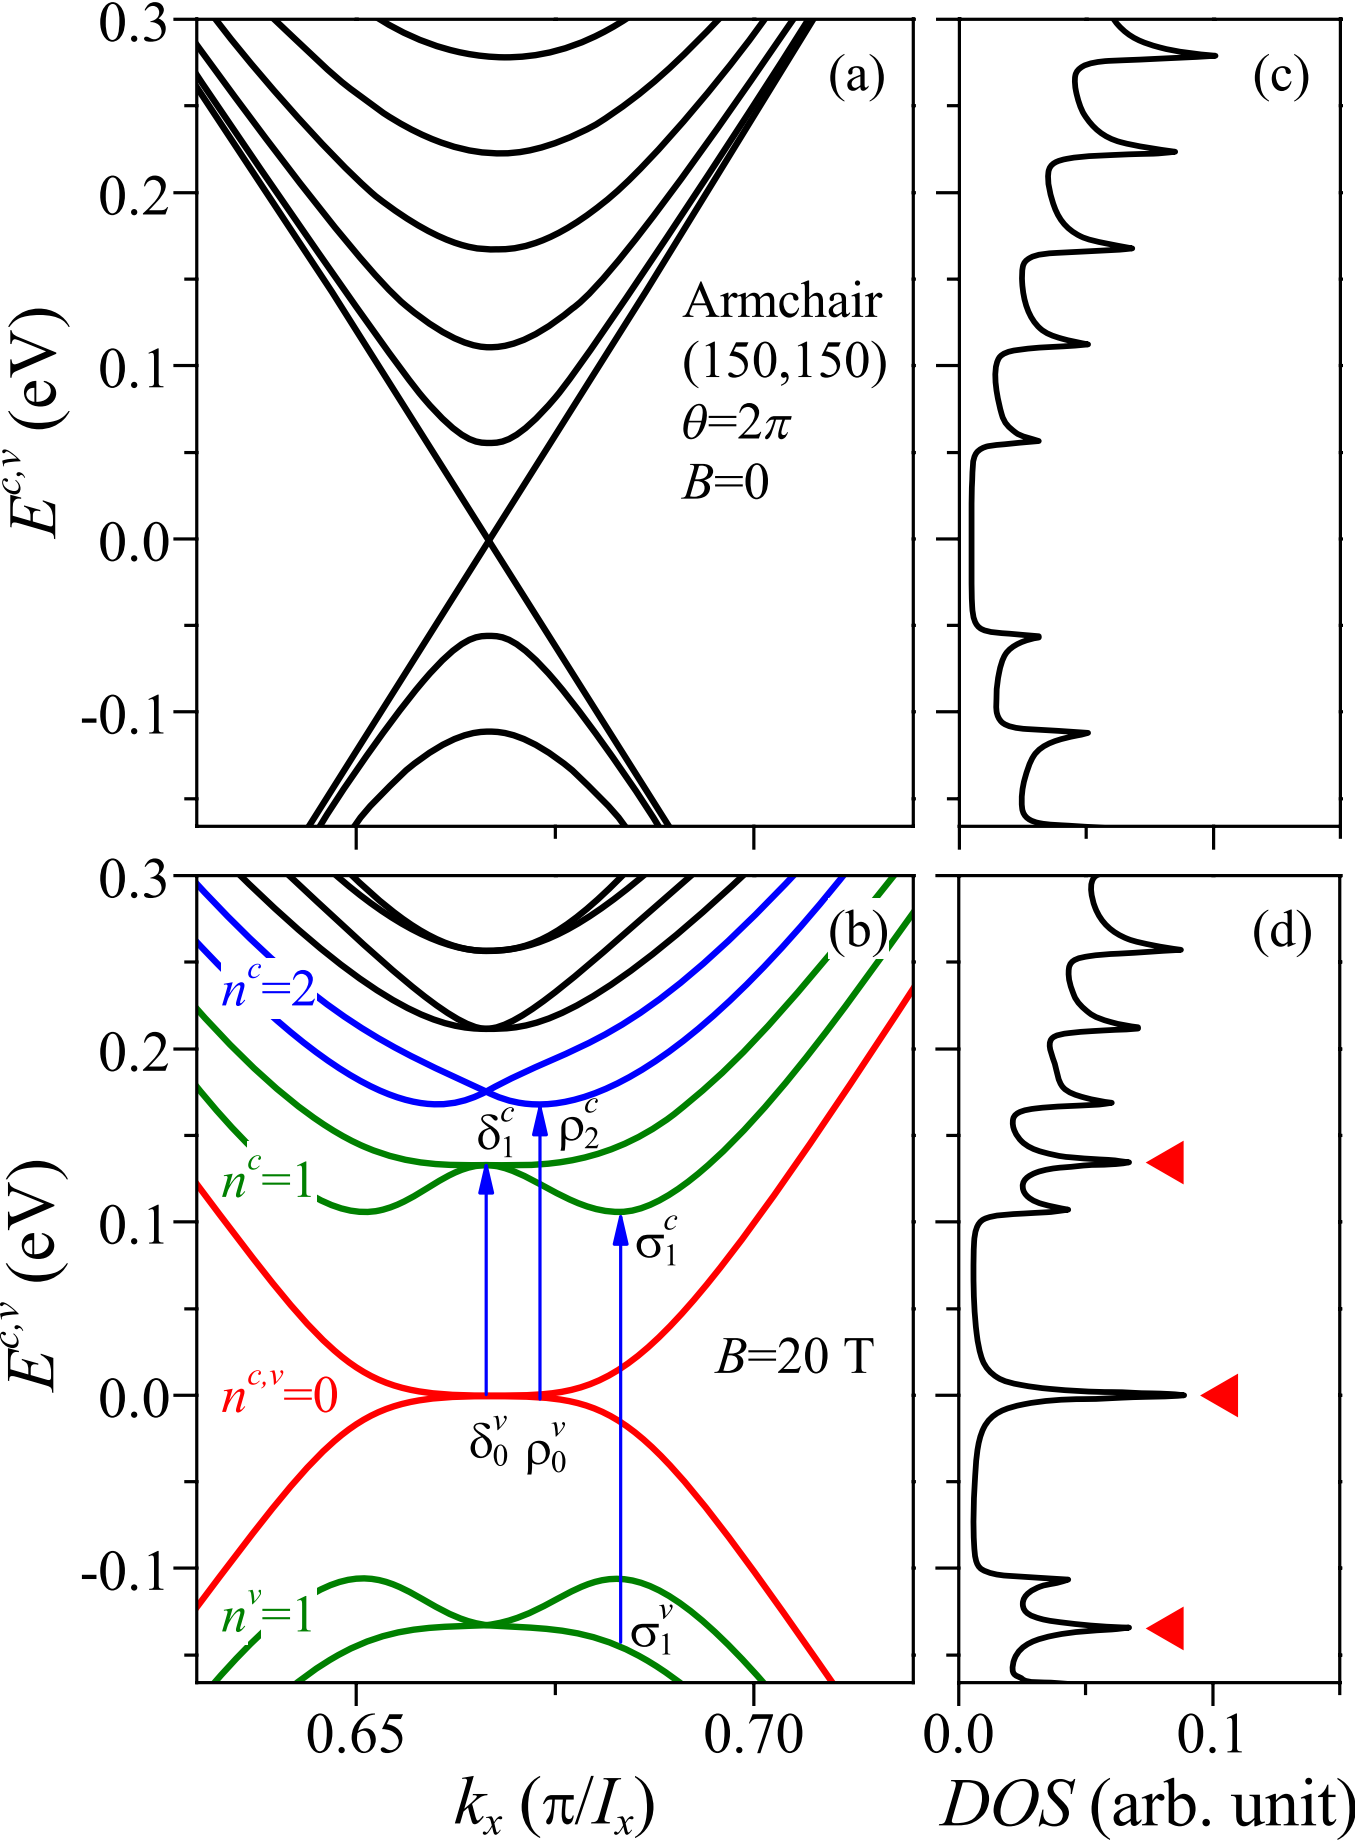

Supplement: c5cp06533j2.zip [file c5cp06533j2.zip]

(a) AB stacking

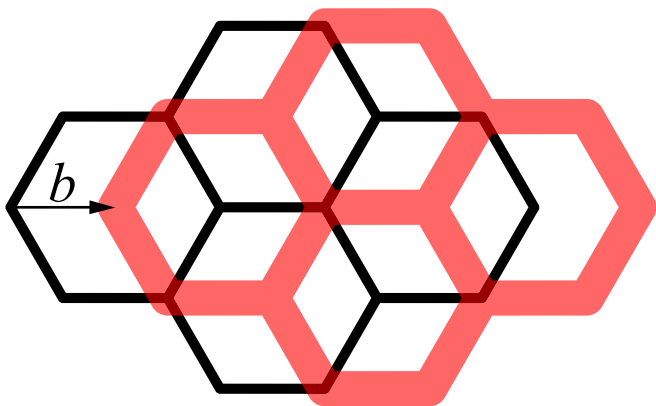

(b) AA stacking

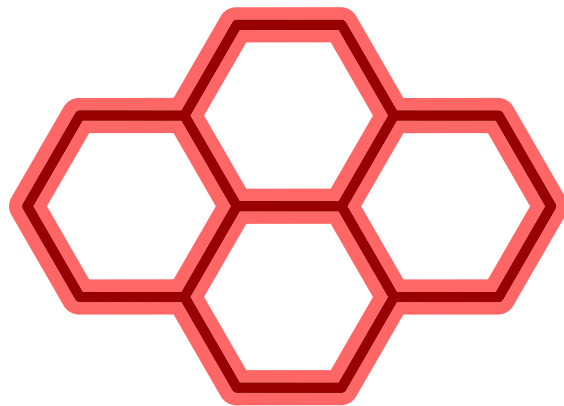

(c)

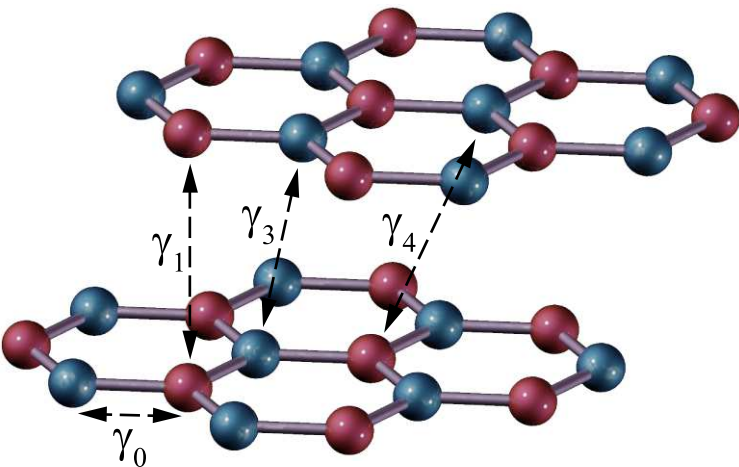

(d)

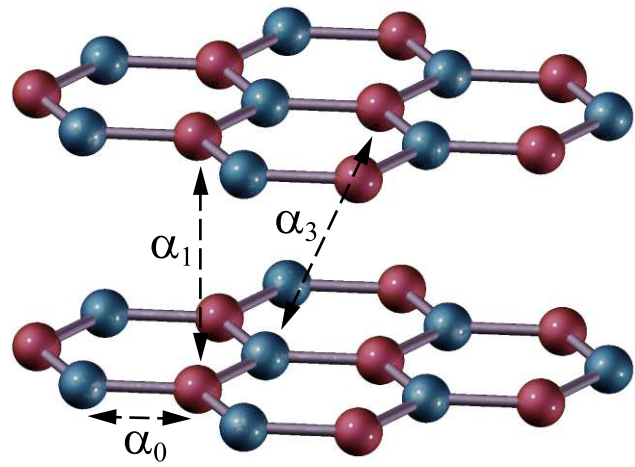

Supplement: c5cp06533j2.zip [file c5cp06533j2.zip]

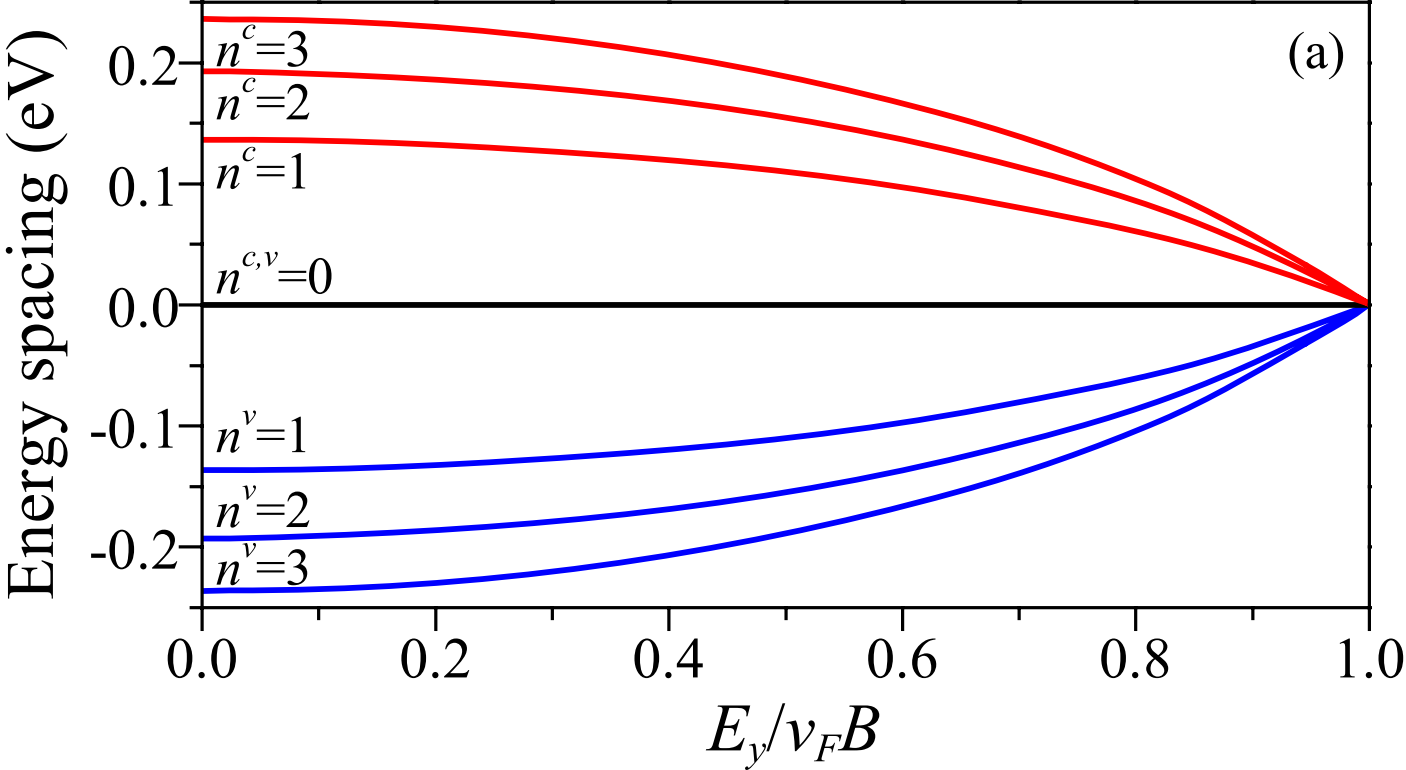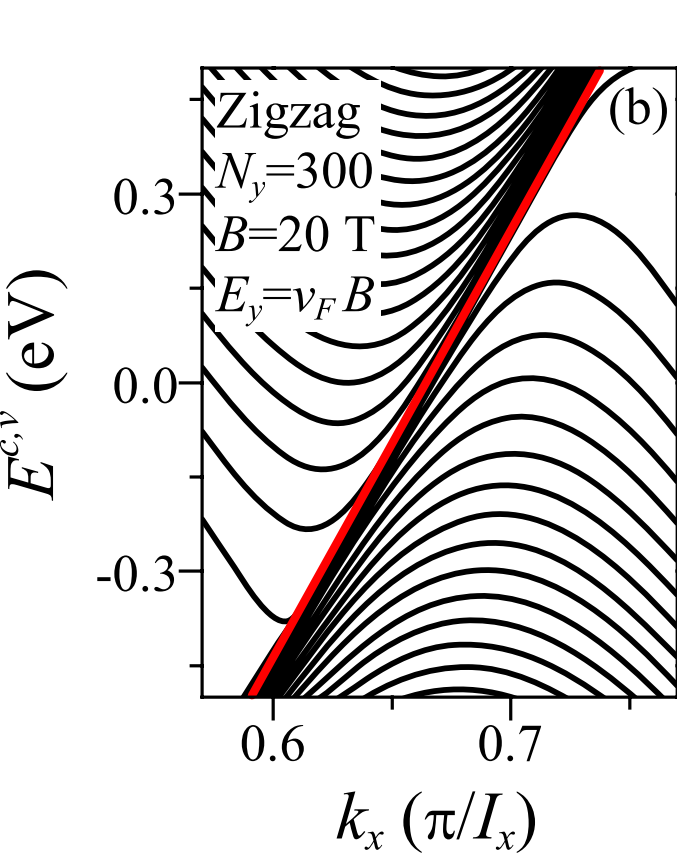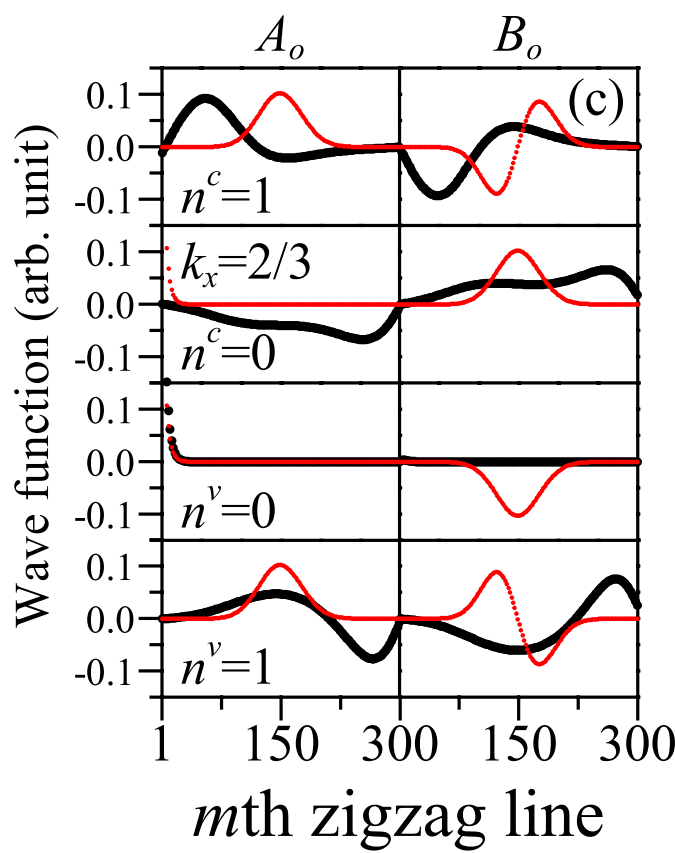

Supplement: c5cp06533j2.zip [file c5cp06533j2.zip]

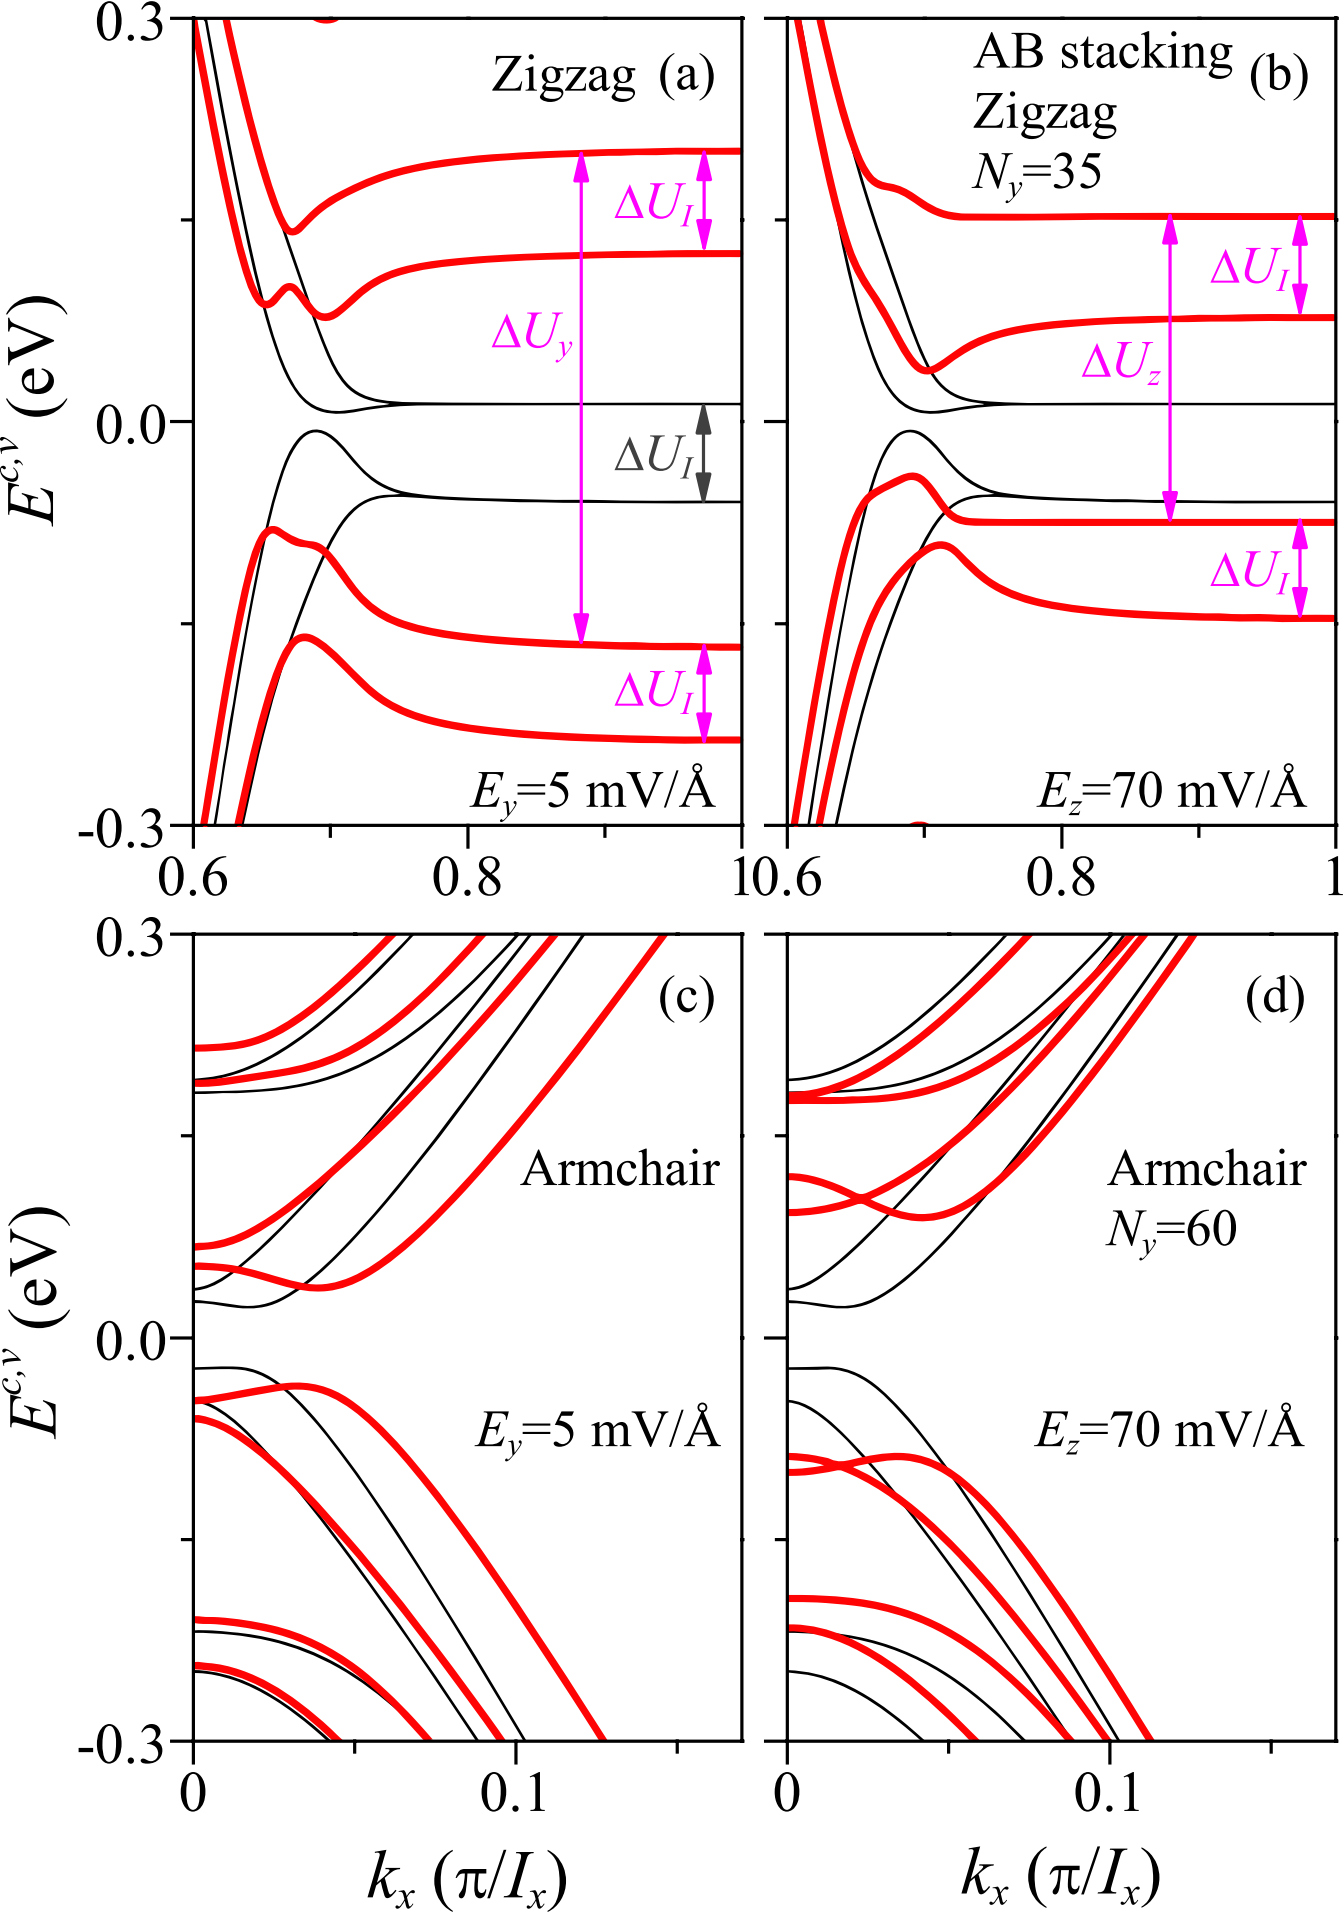

Supplement: c5cp06533j2.zip [file c5cp06533j2.zip]

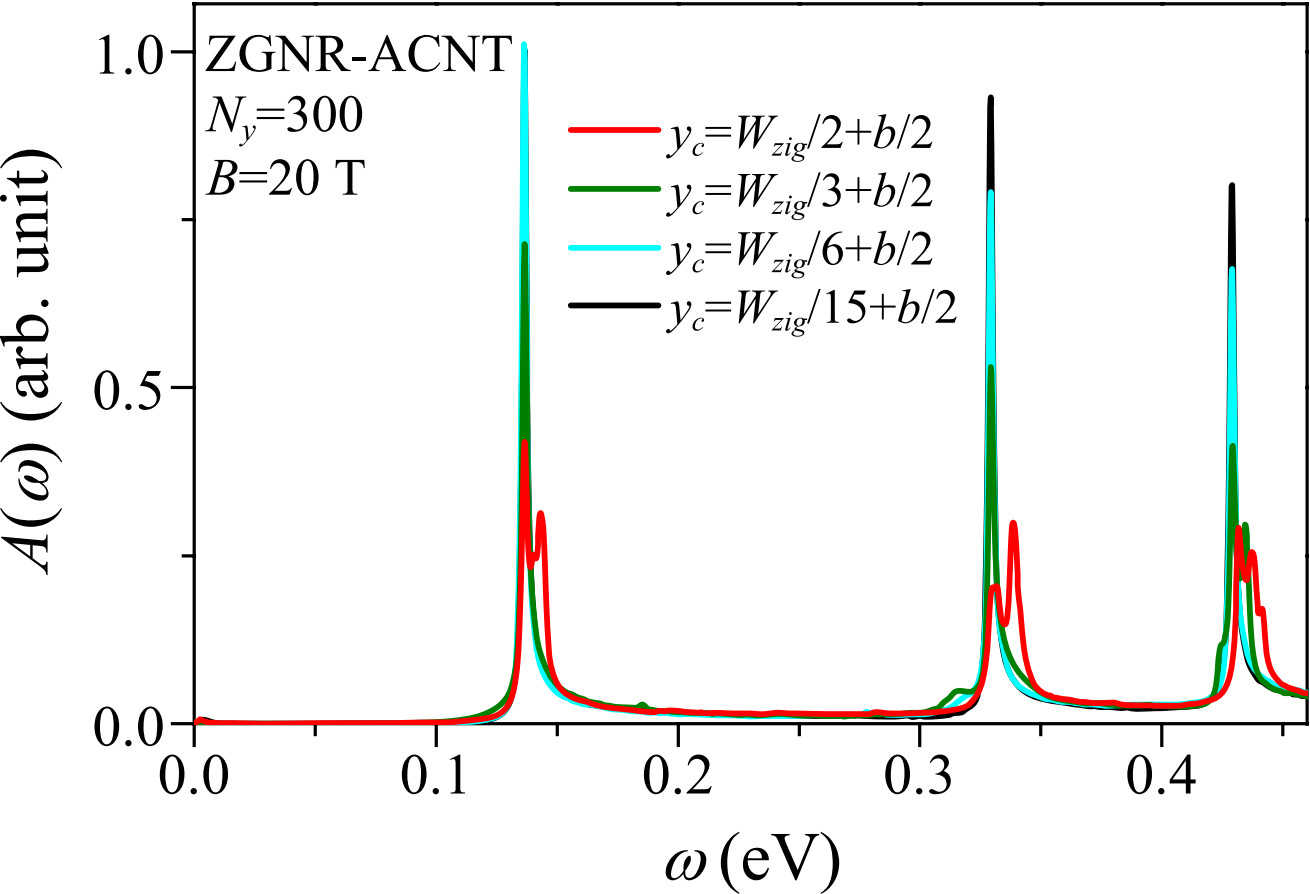

Supplement: c5cp06533j2.zip [file c5cp06533j2.zip]

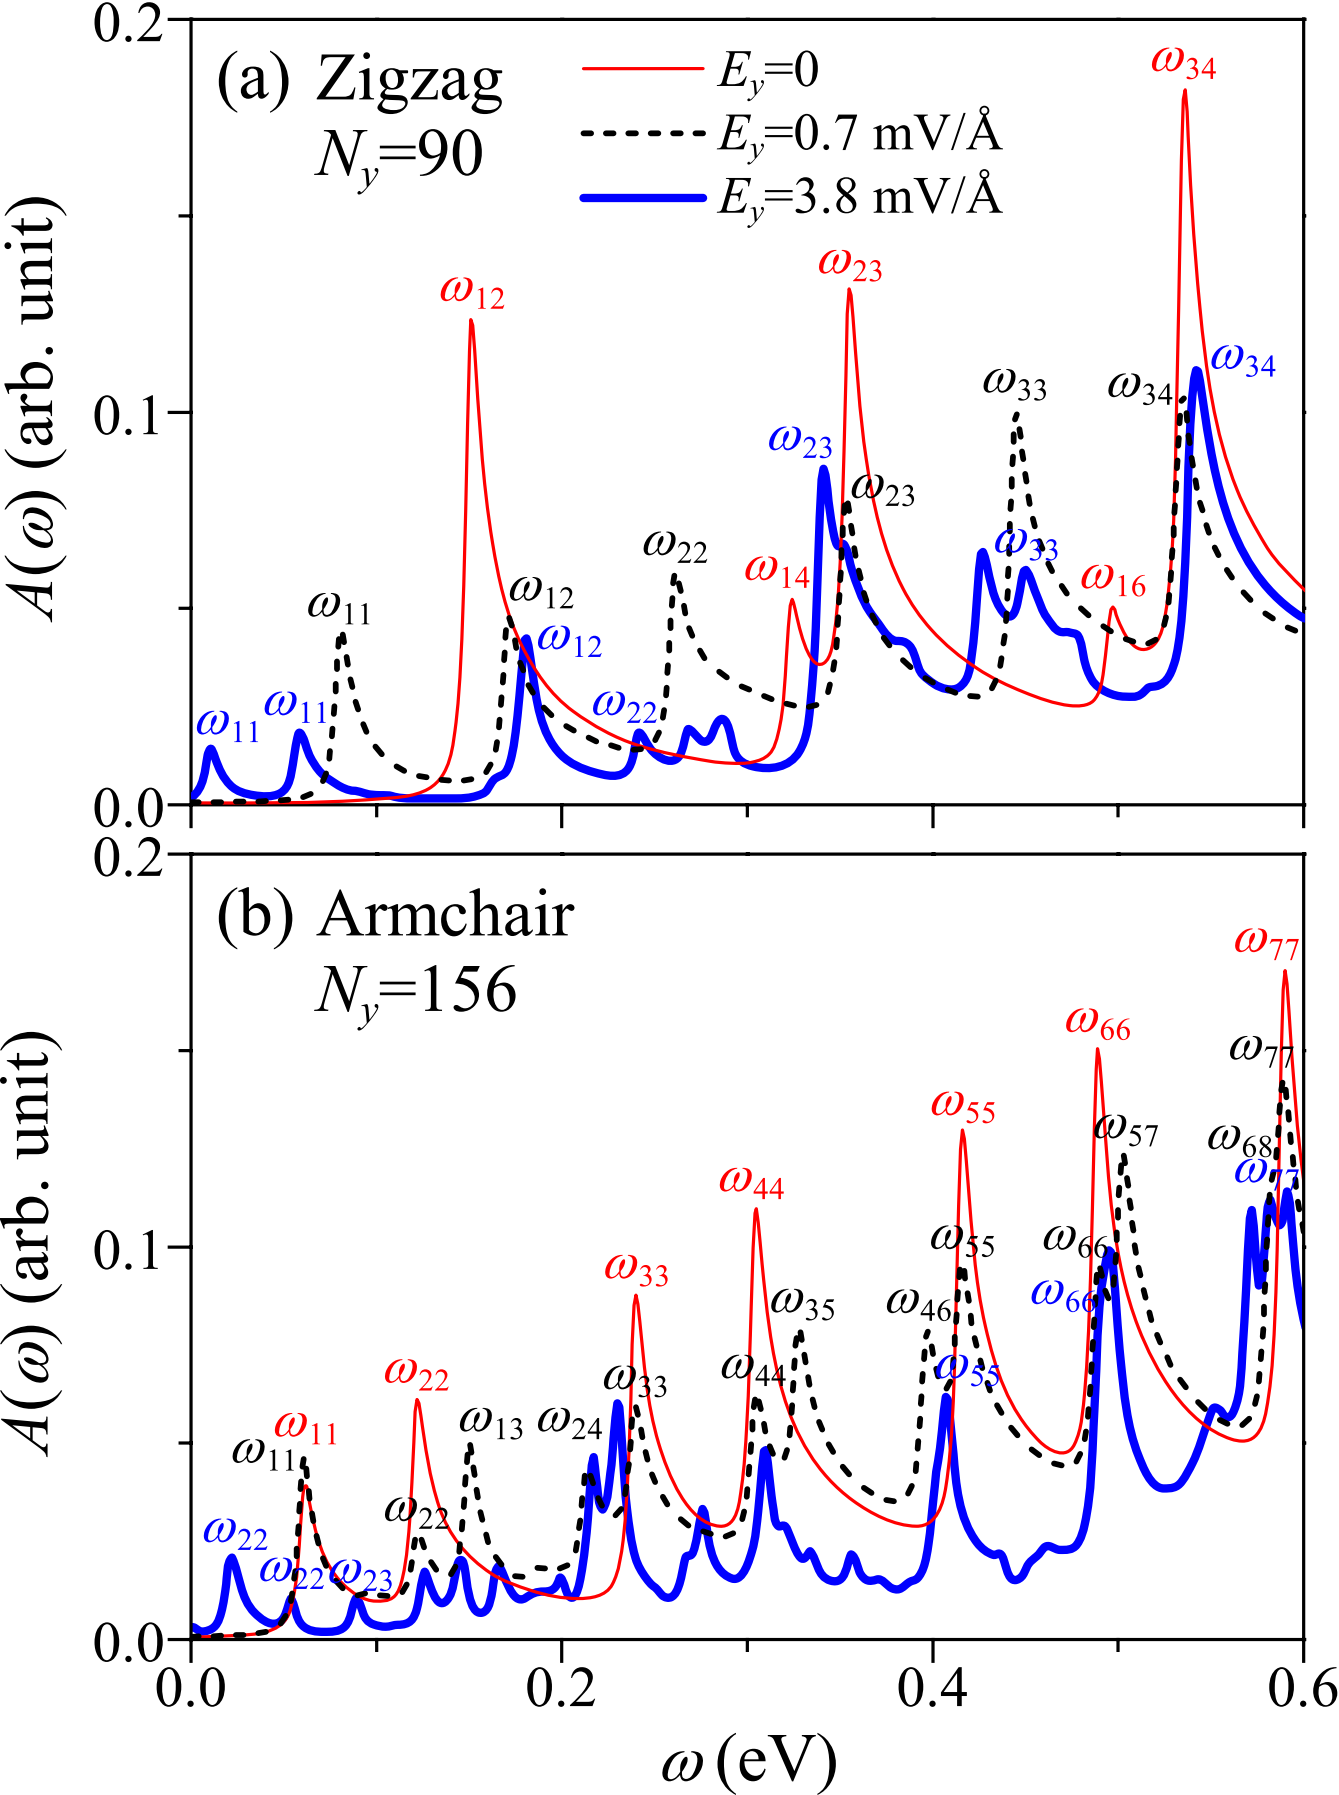

Supplement: c5cp06533j2.zip [file c5cp06533j2.zip]

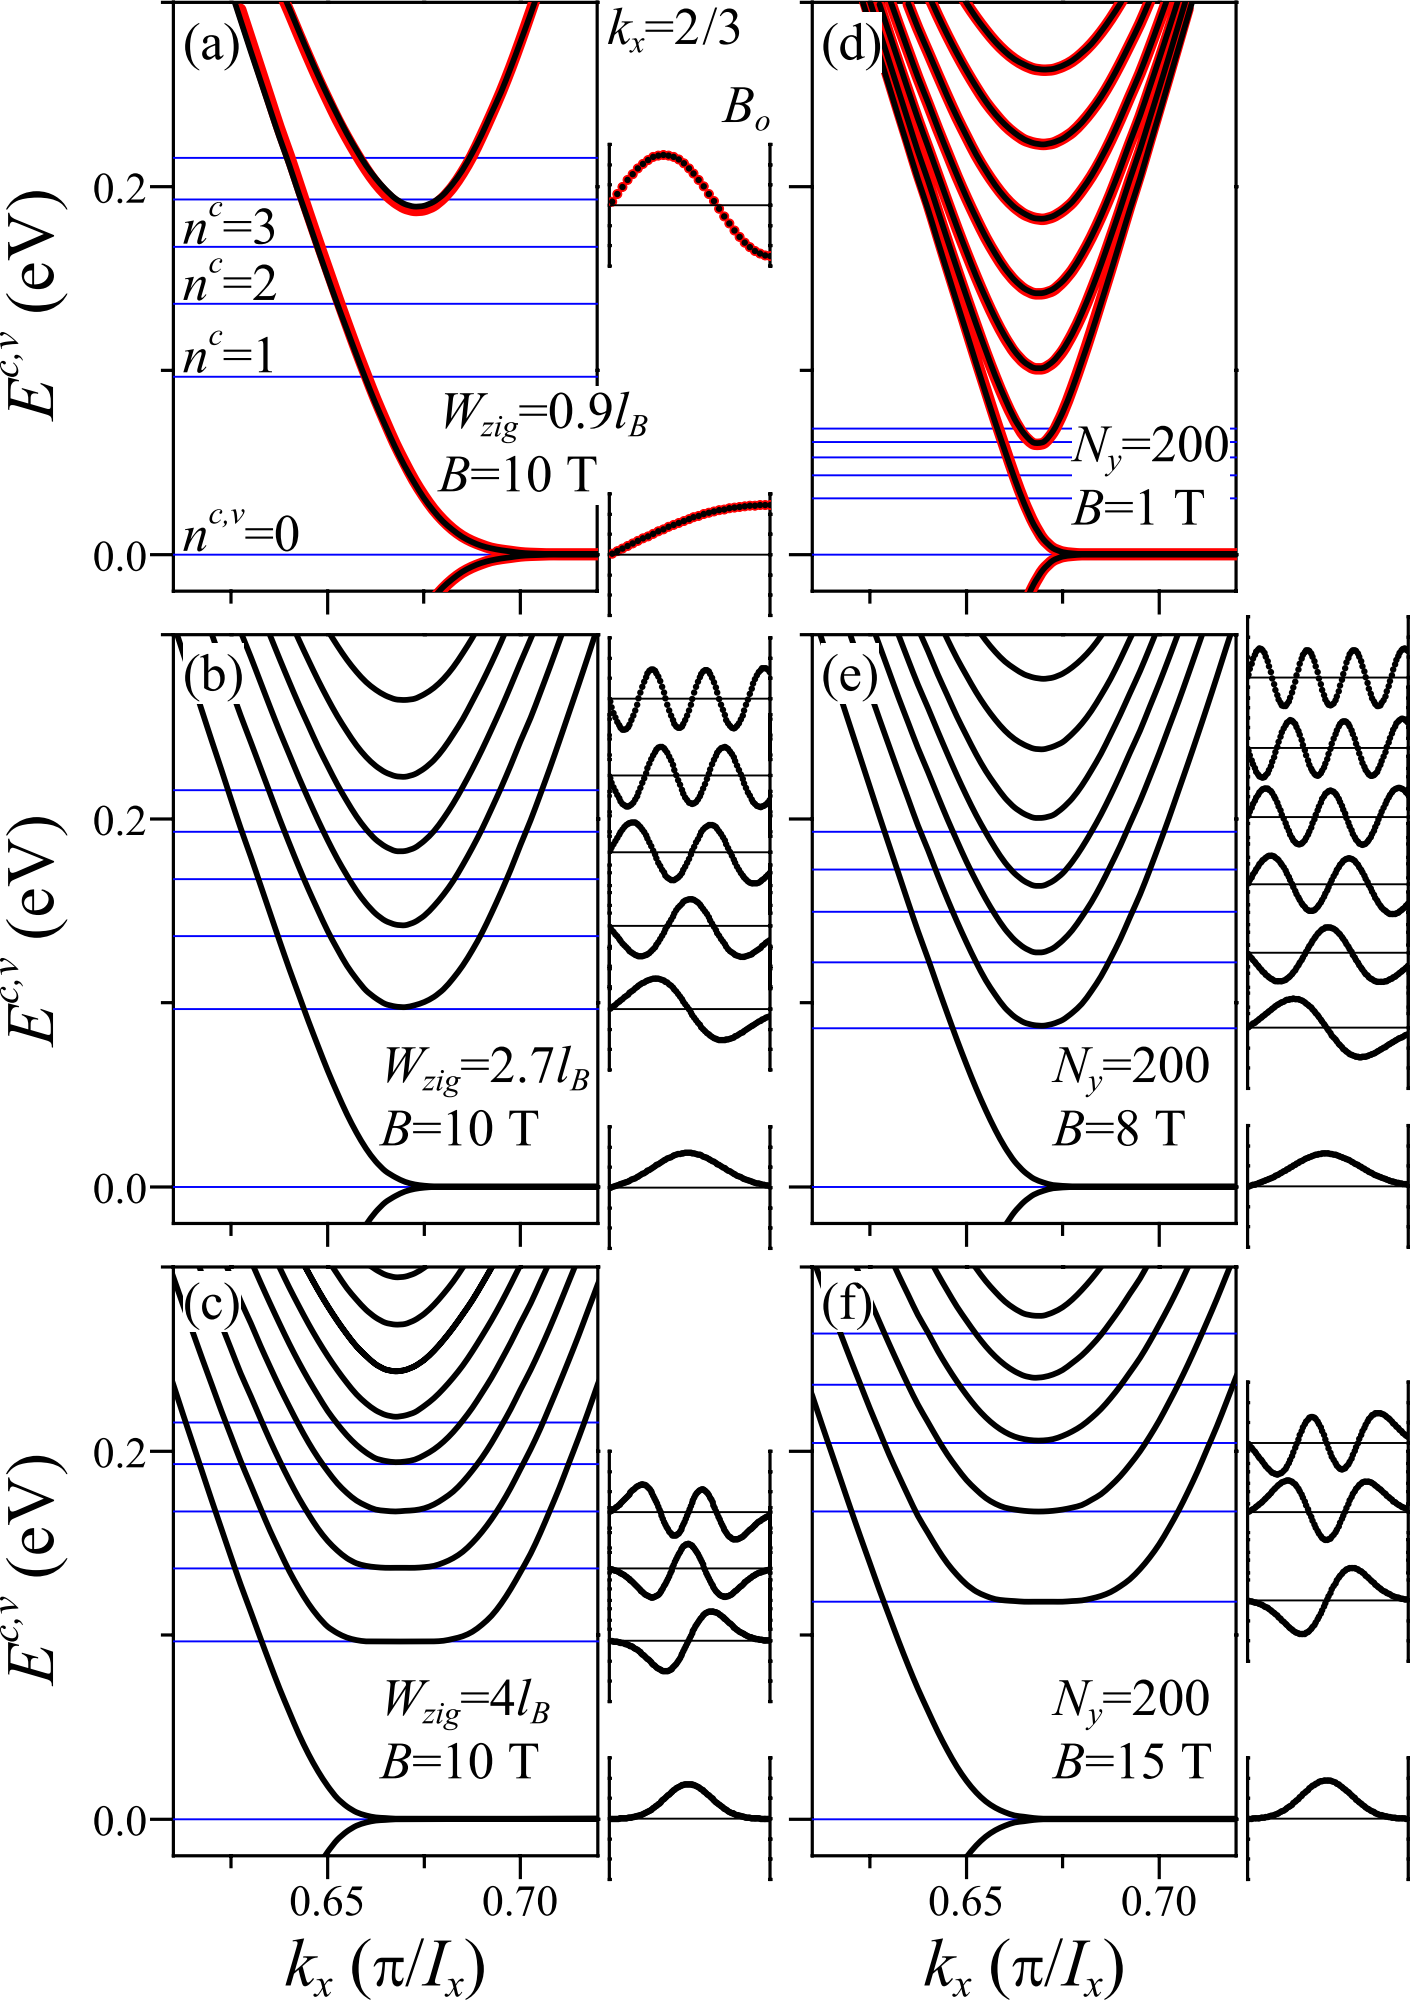

Supplement: c5cp06533j2.zip [file c5cp06533j2.zip]

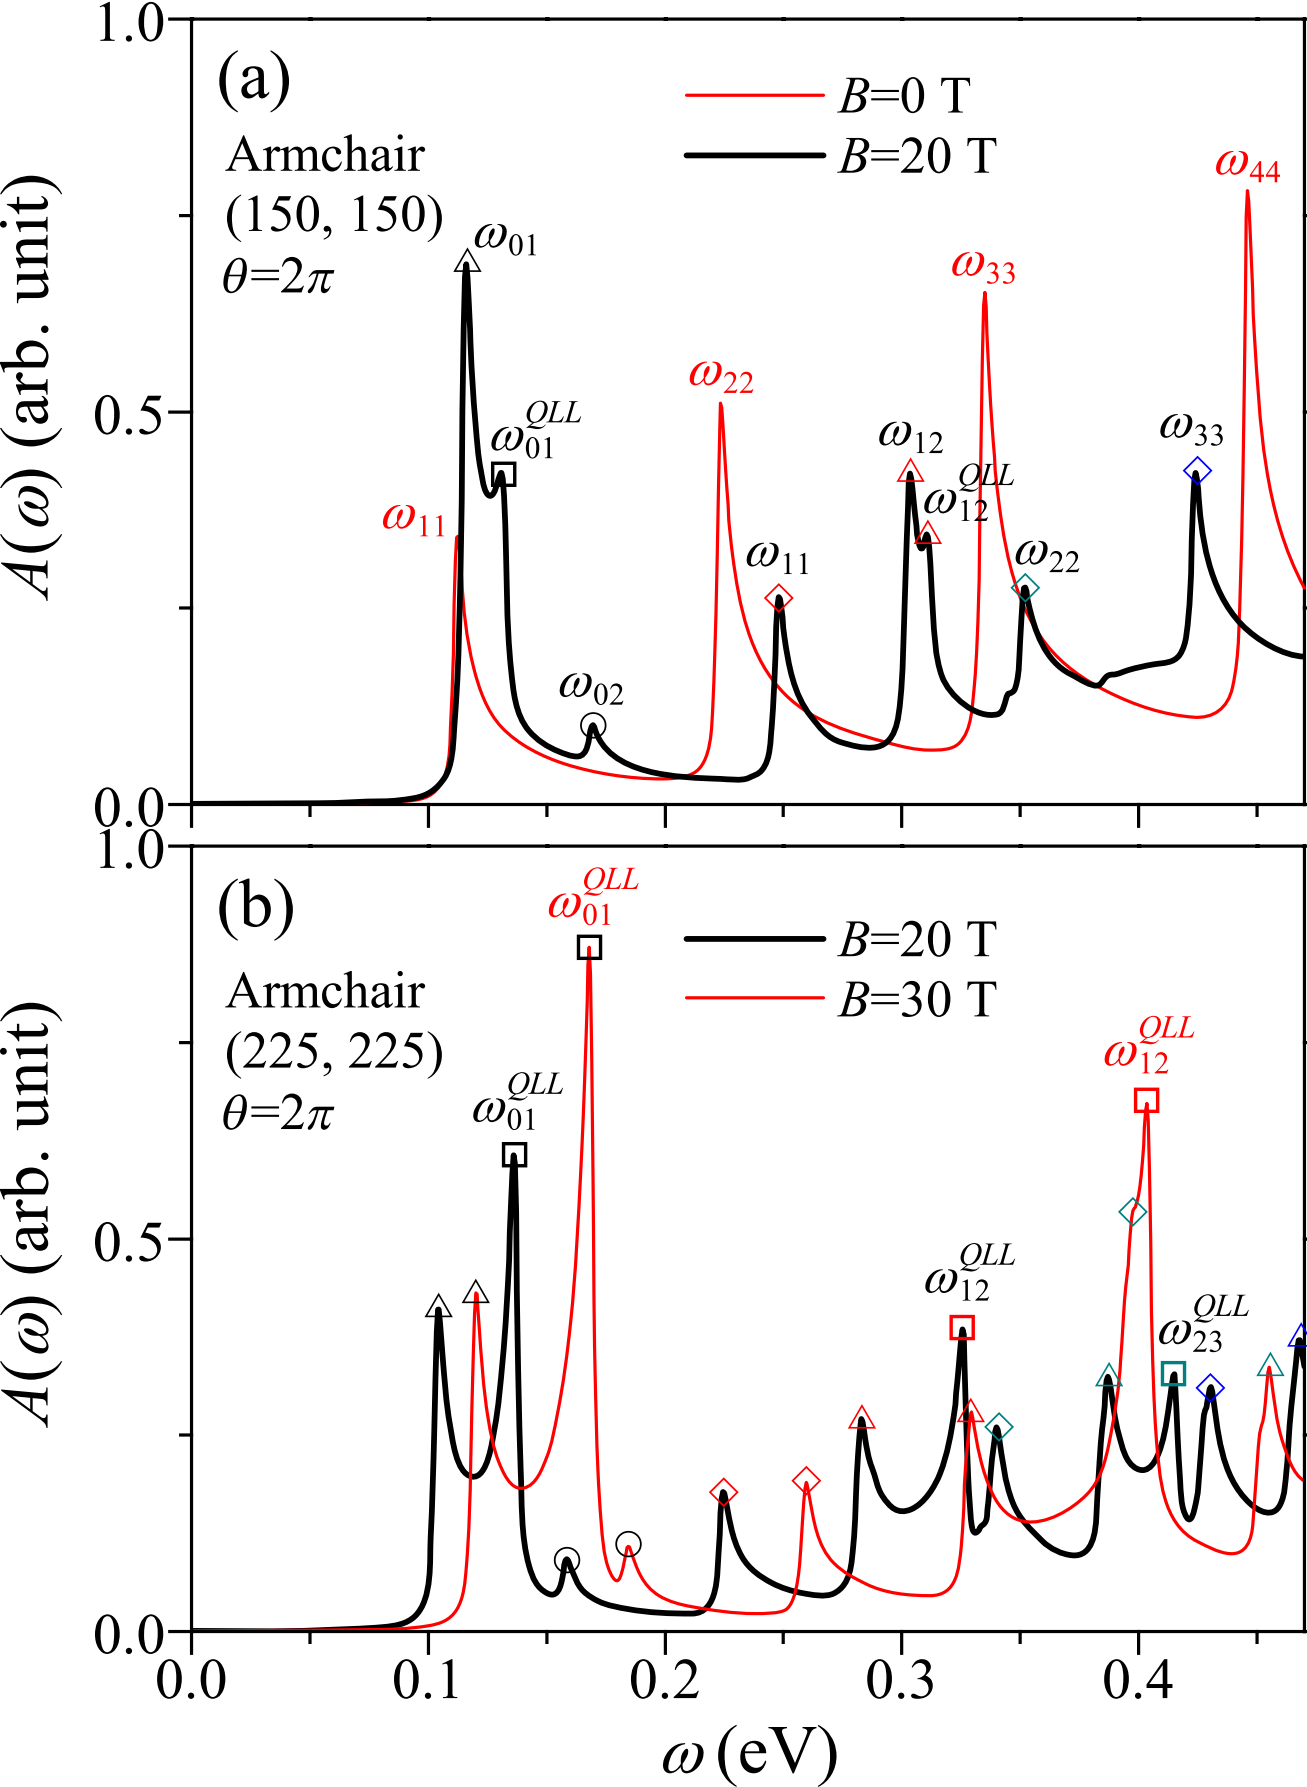

Supplement: c5cp06533j2.zip [file c5cp06533j2.zip]

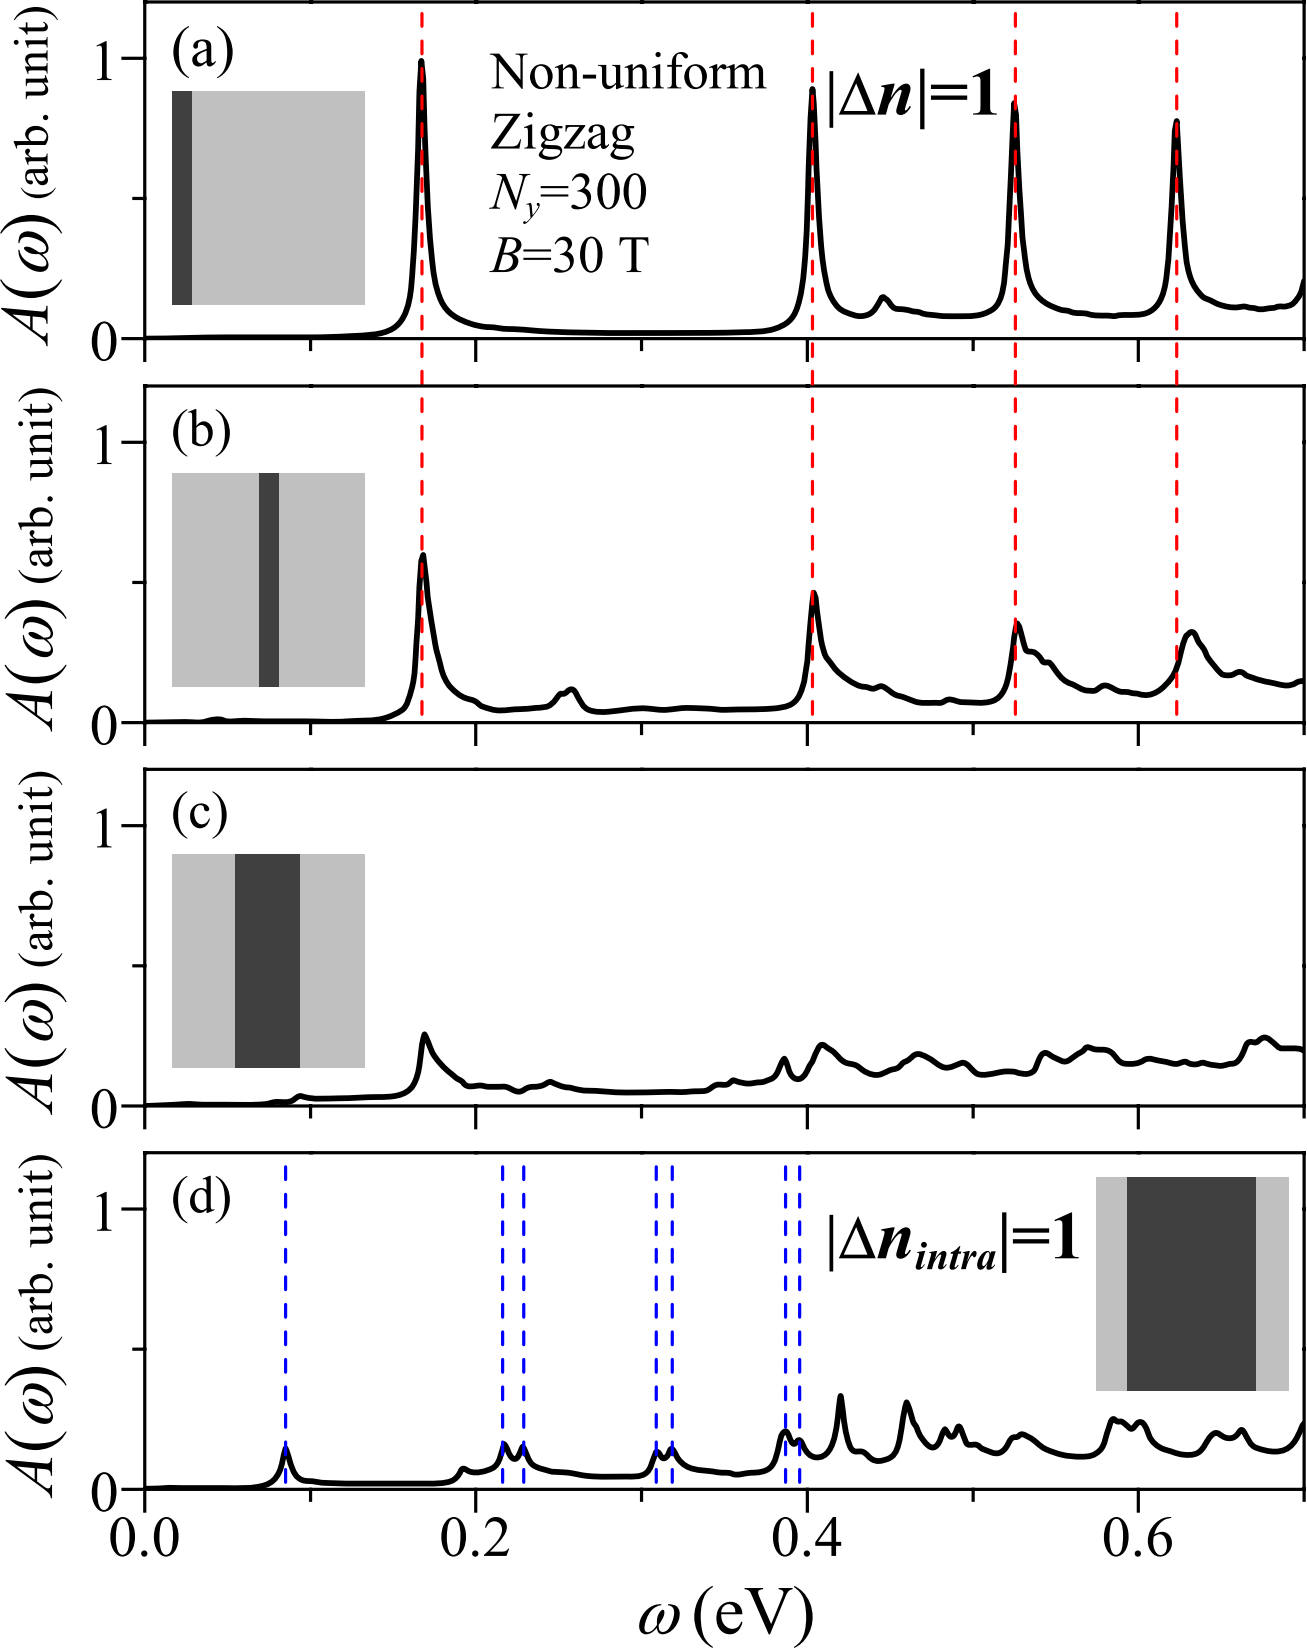

Supplement: c5cp06533j2.zip [file c5cp06533j2.zip]

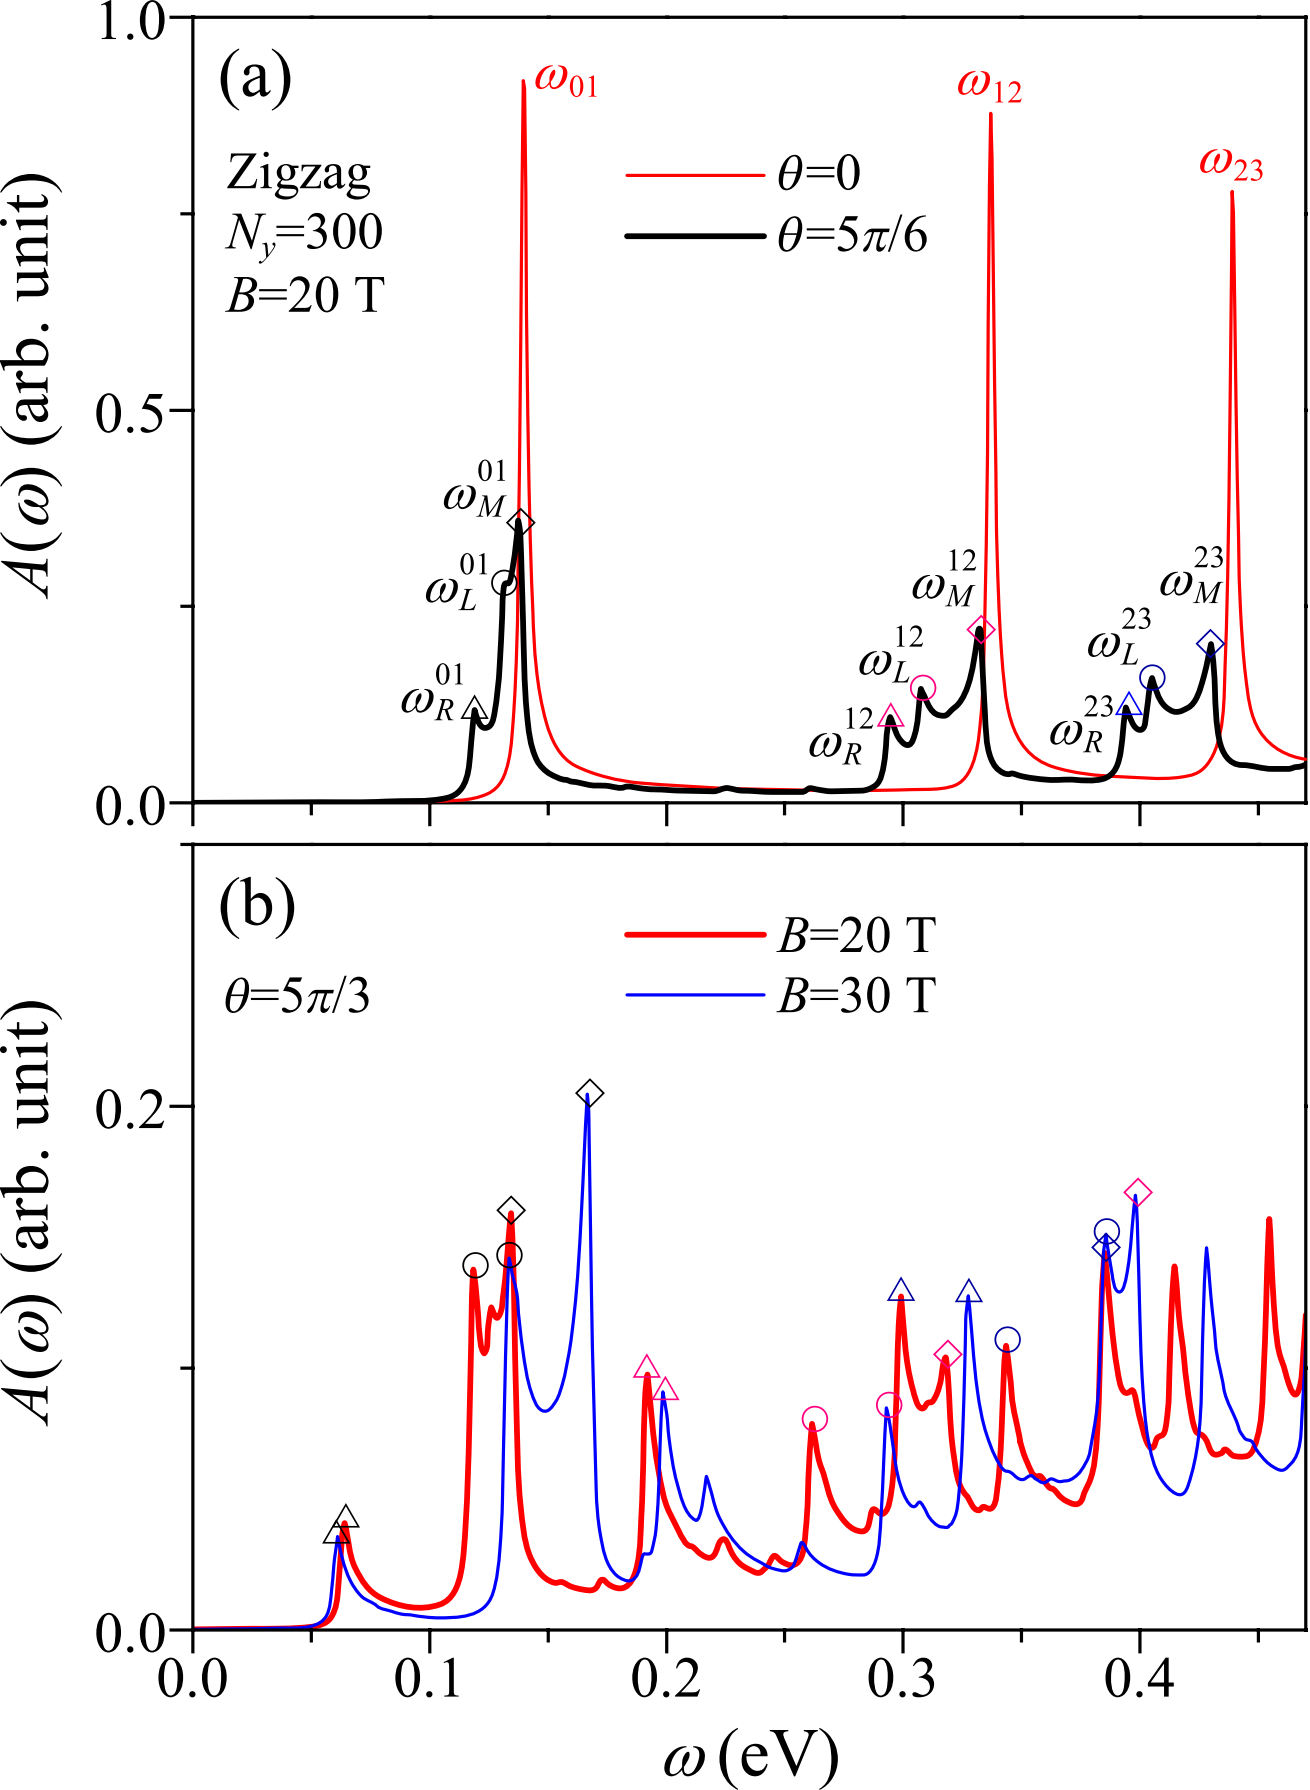

Supplement: c5cp06533j2.zip [file c5cp06533j2.zip]

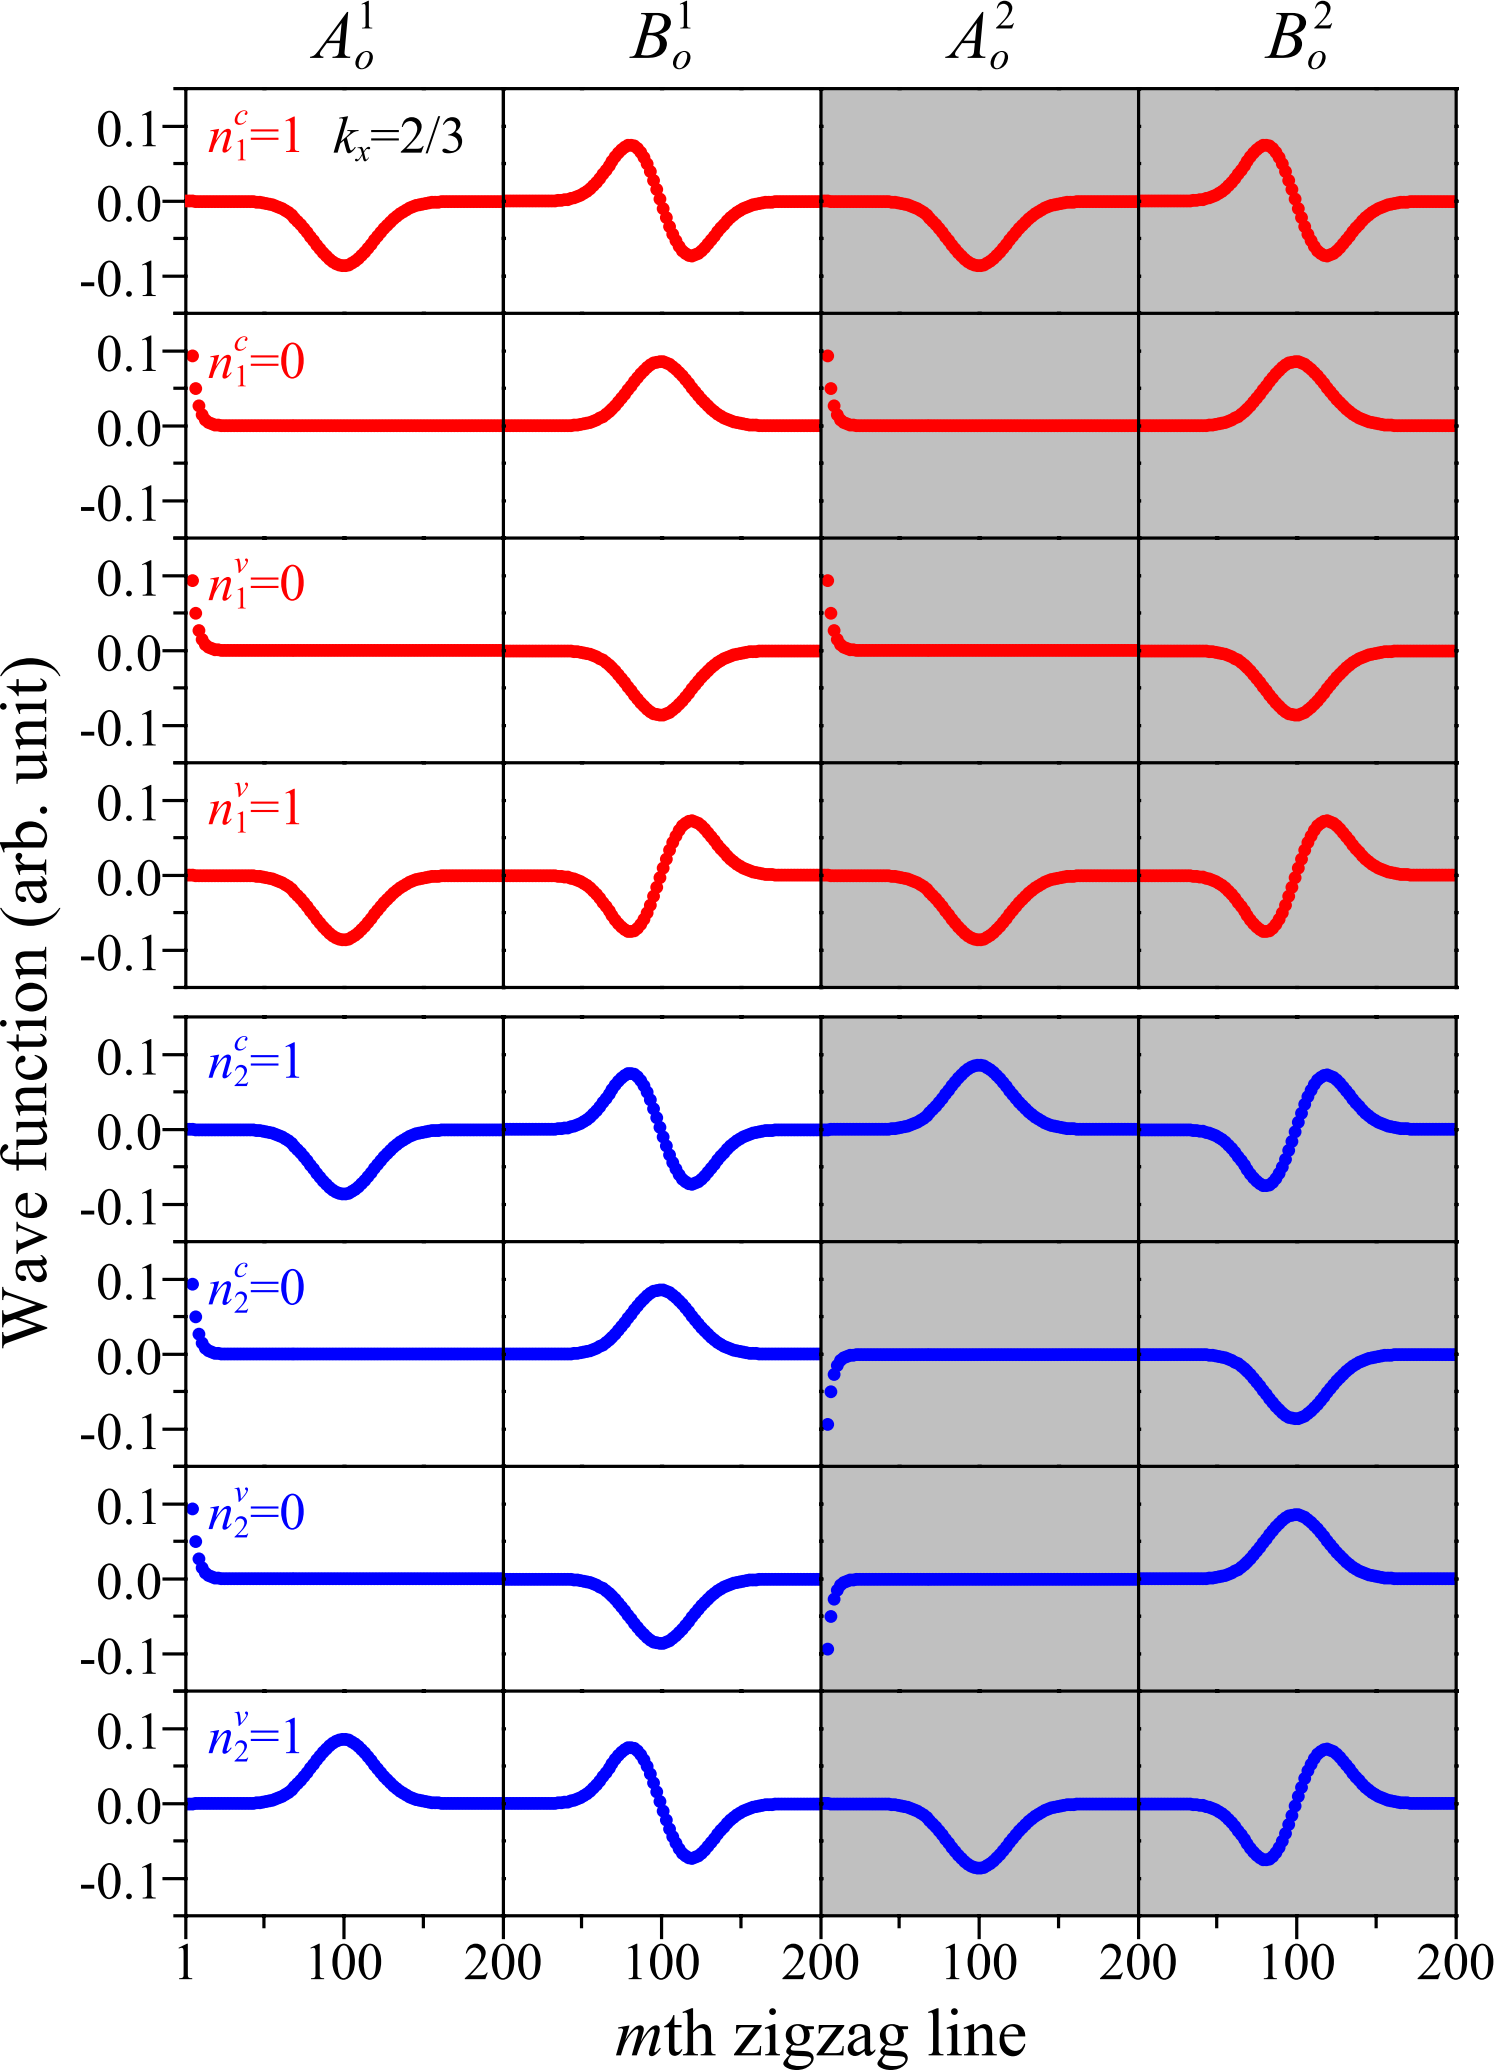

Supplement: c5cp06533j2.zip [file c5cp06533j2.zip]

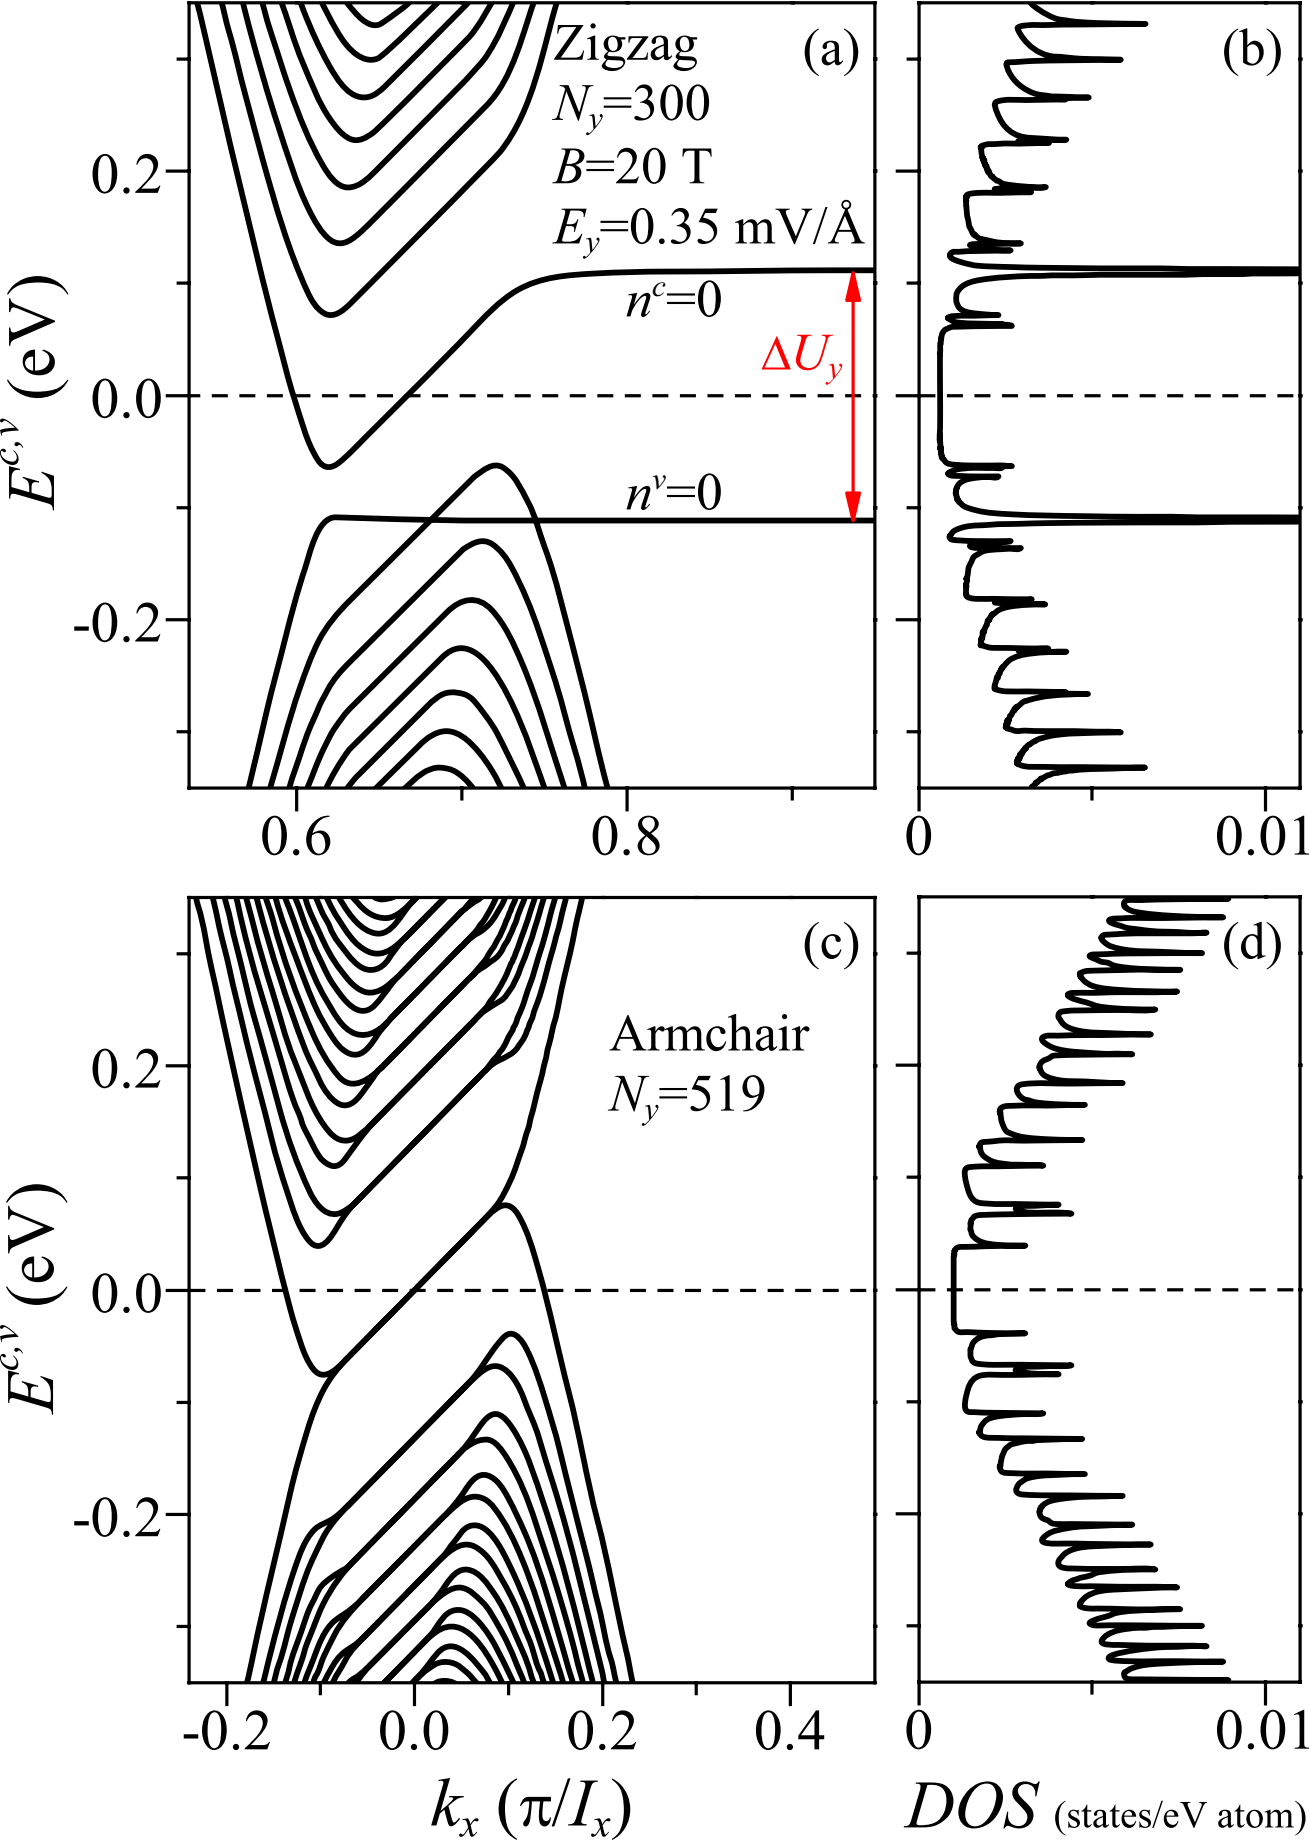

Supplement: c5cp06533j2.zip [file c5cp06533j2.zip]

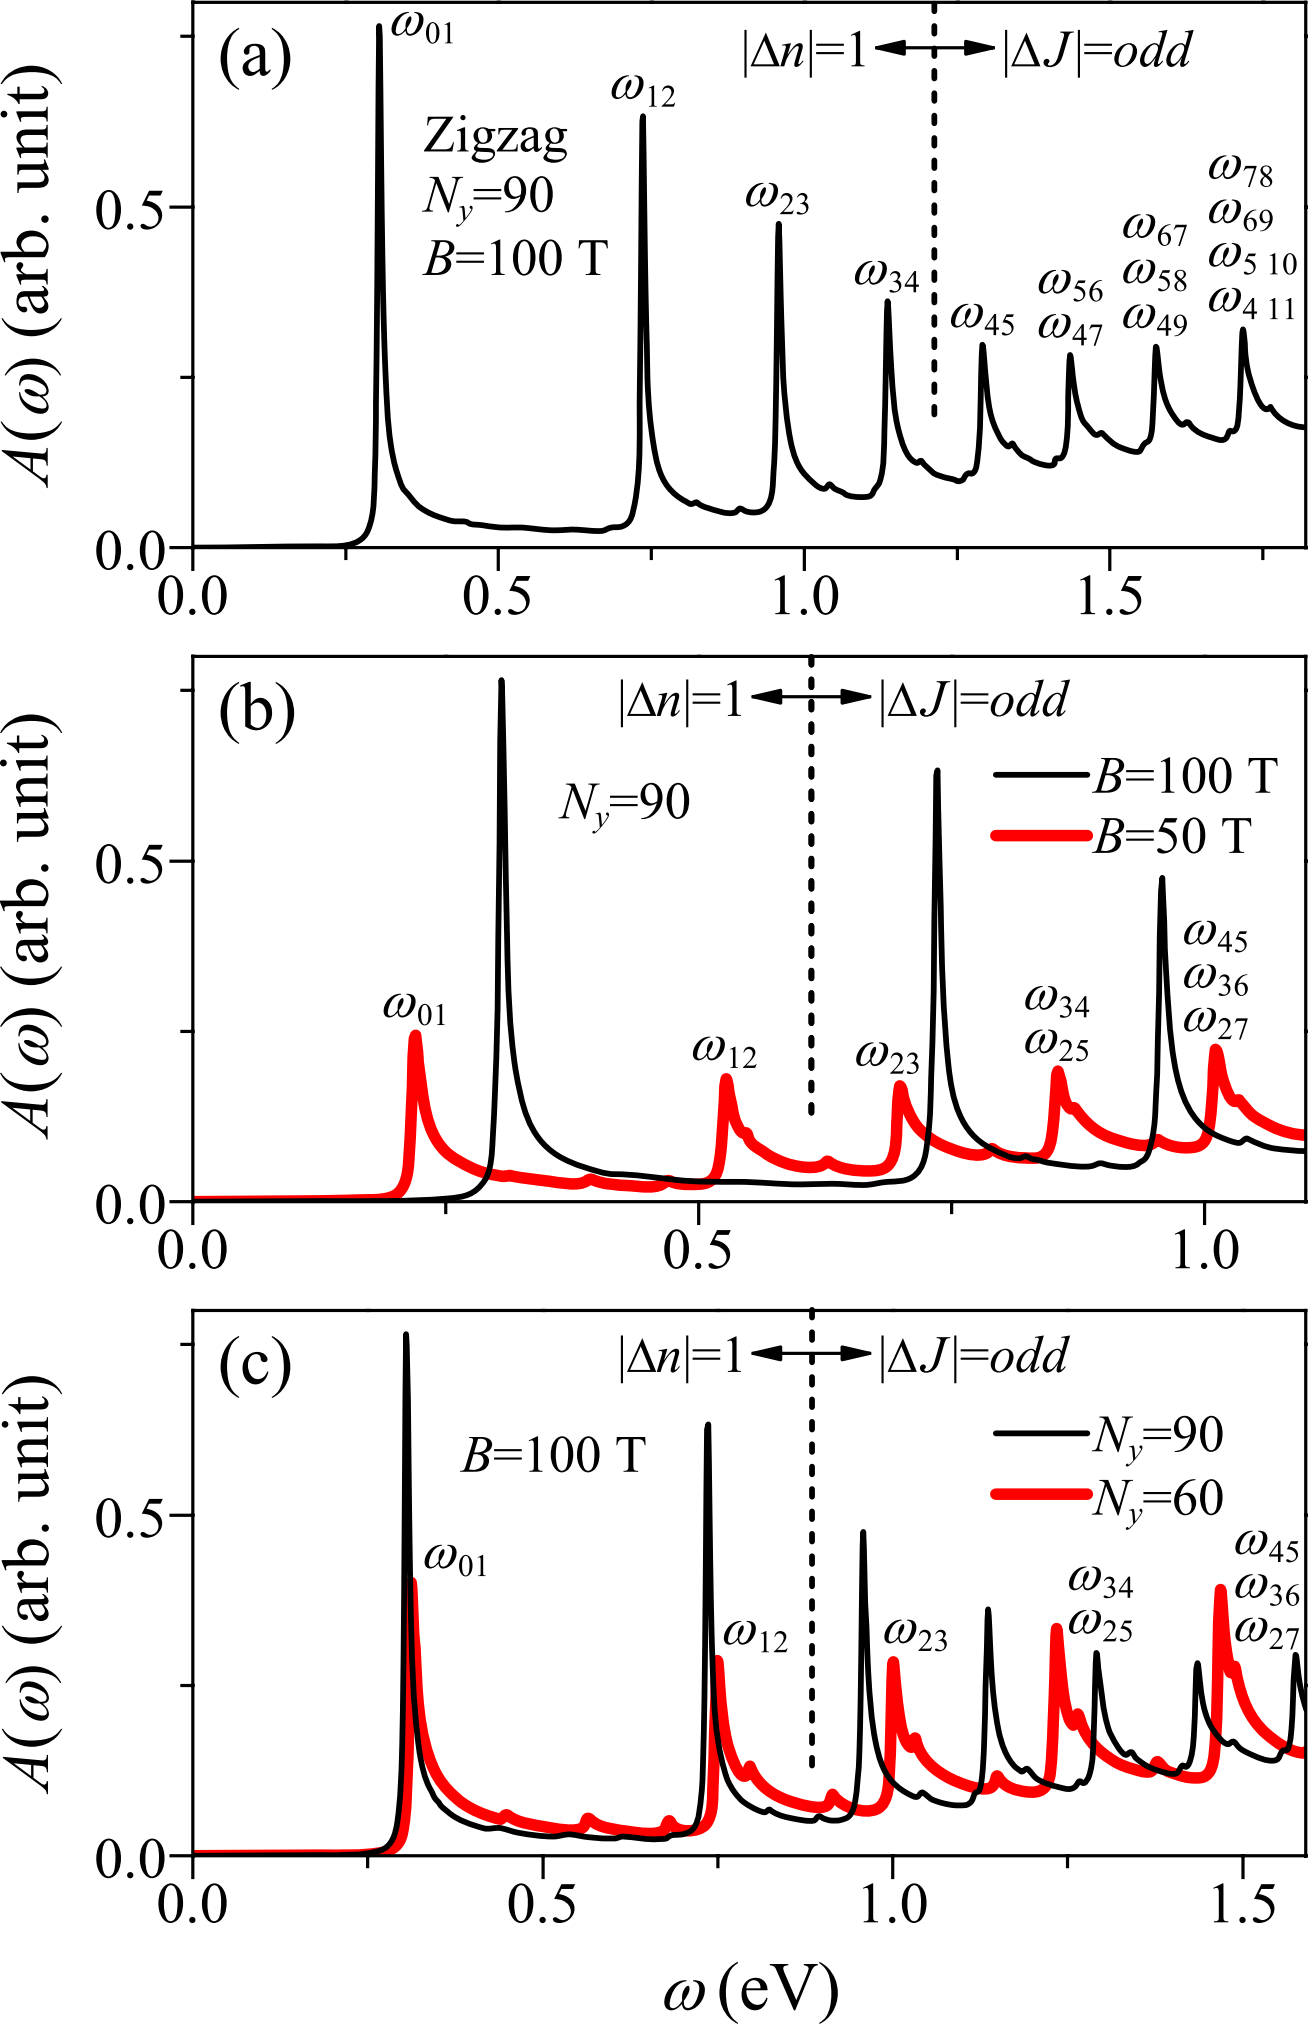

Supplement: c5cp06533j2.zip [file c5cp06533j2.zip]

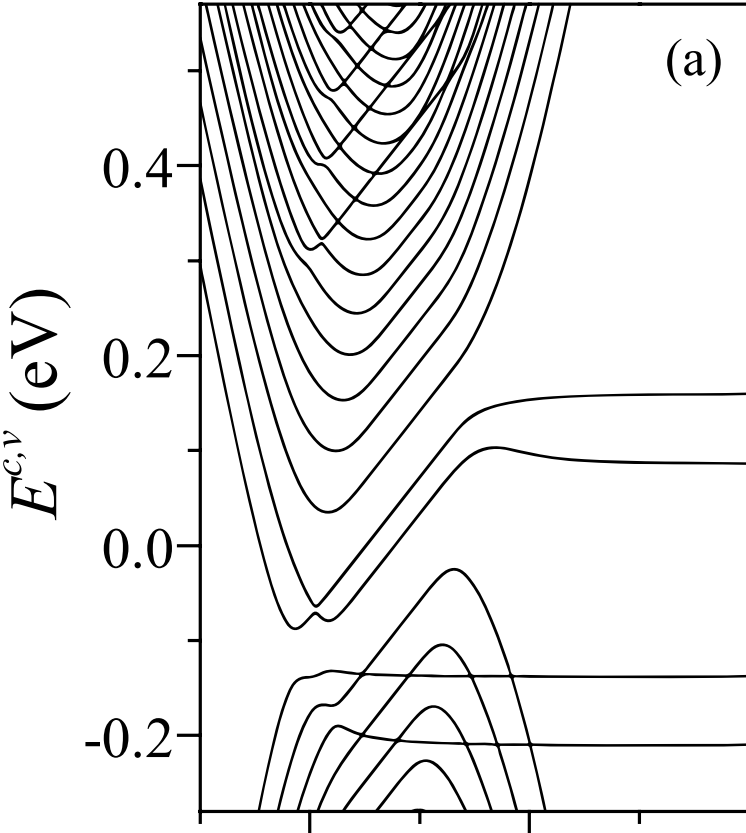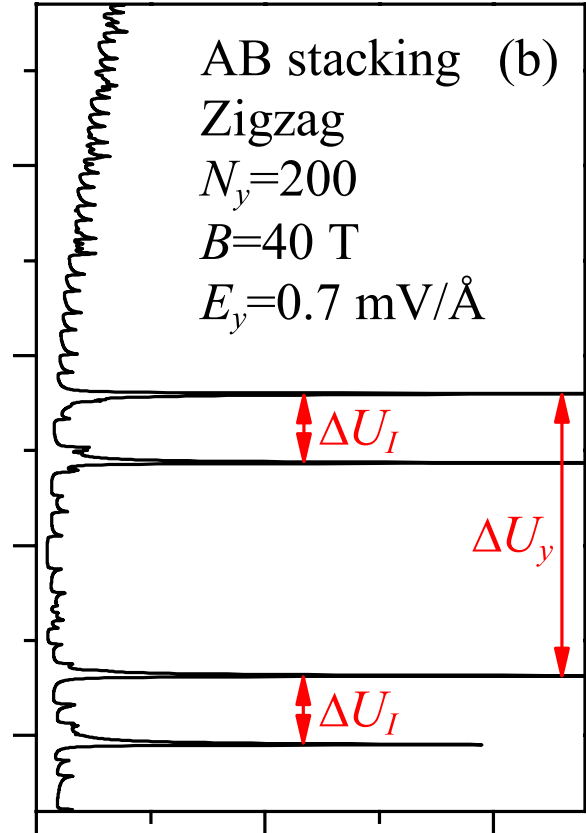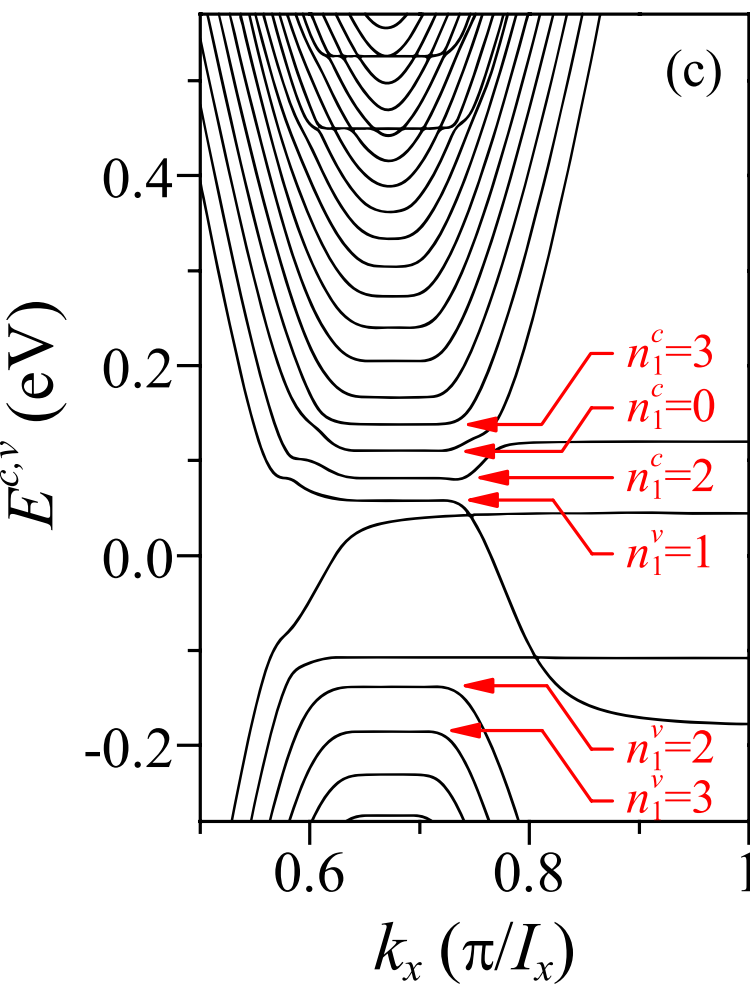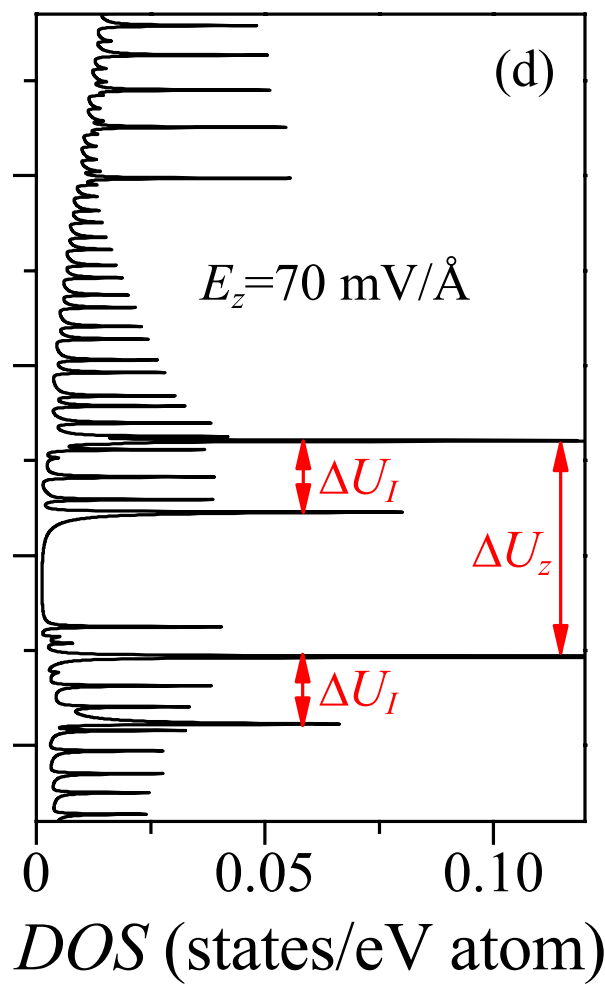

Supplement: c5cp06533j2.zip [file c5cp06533j2.zip]

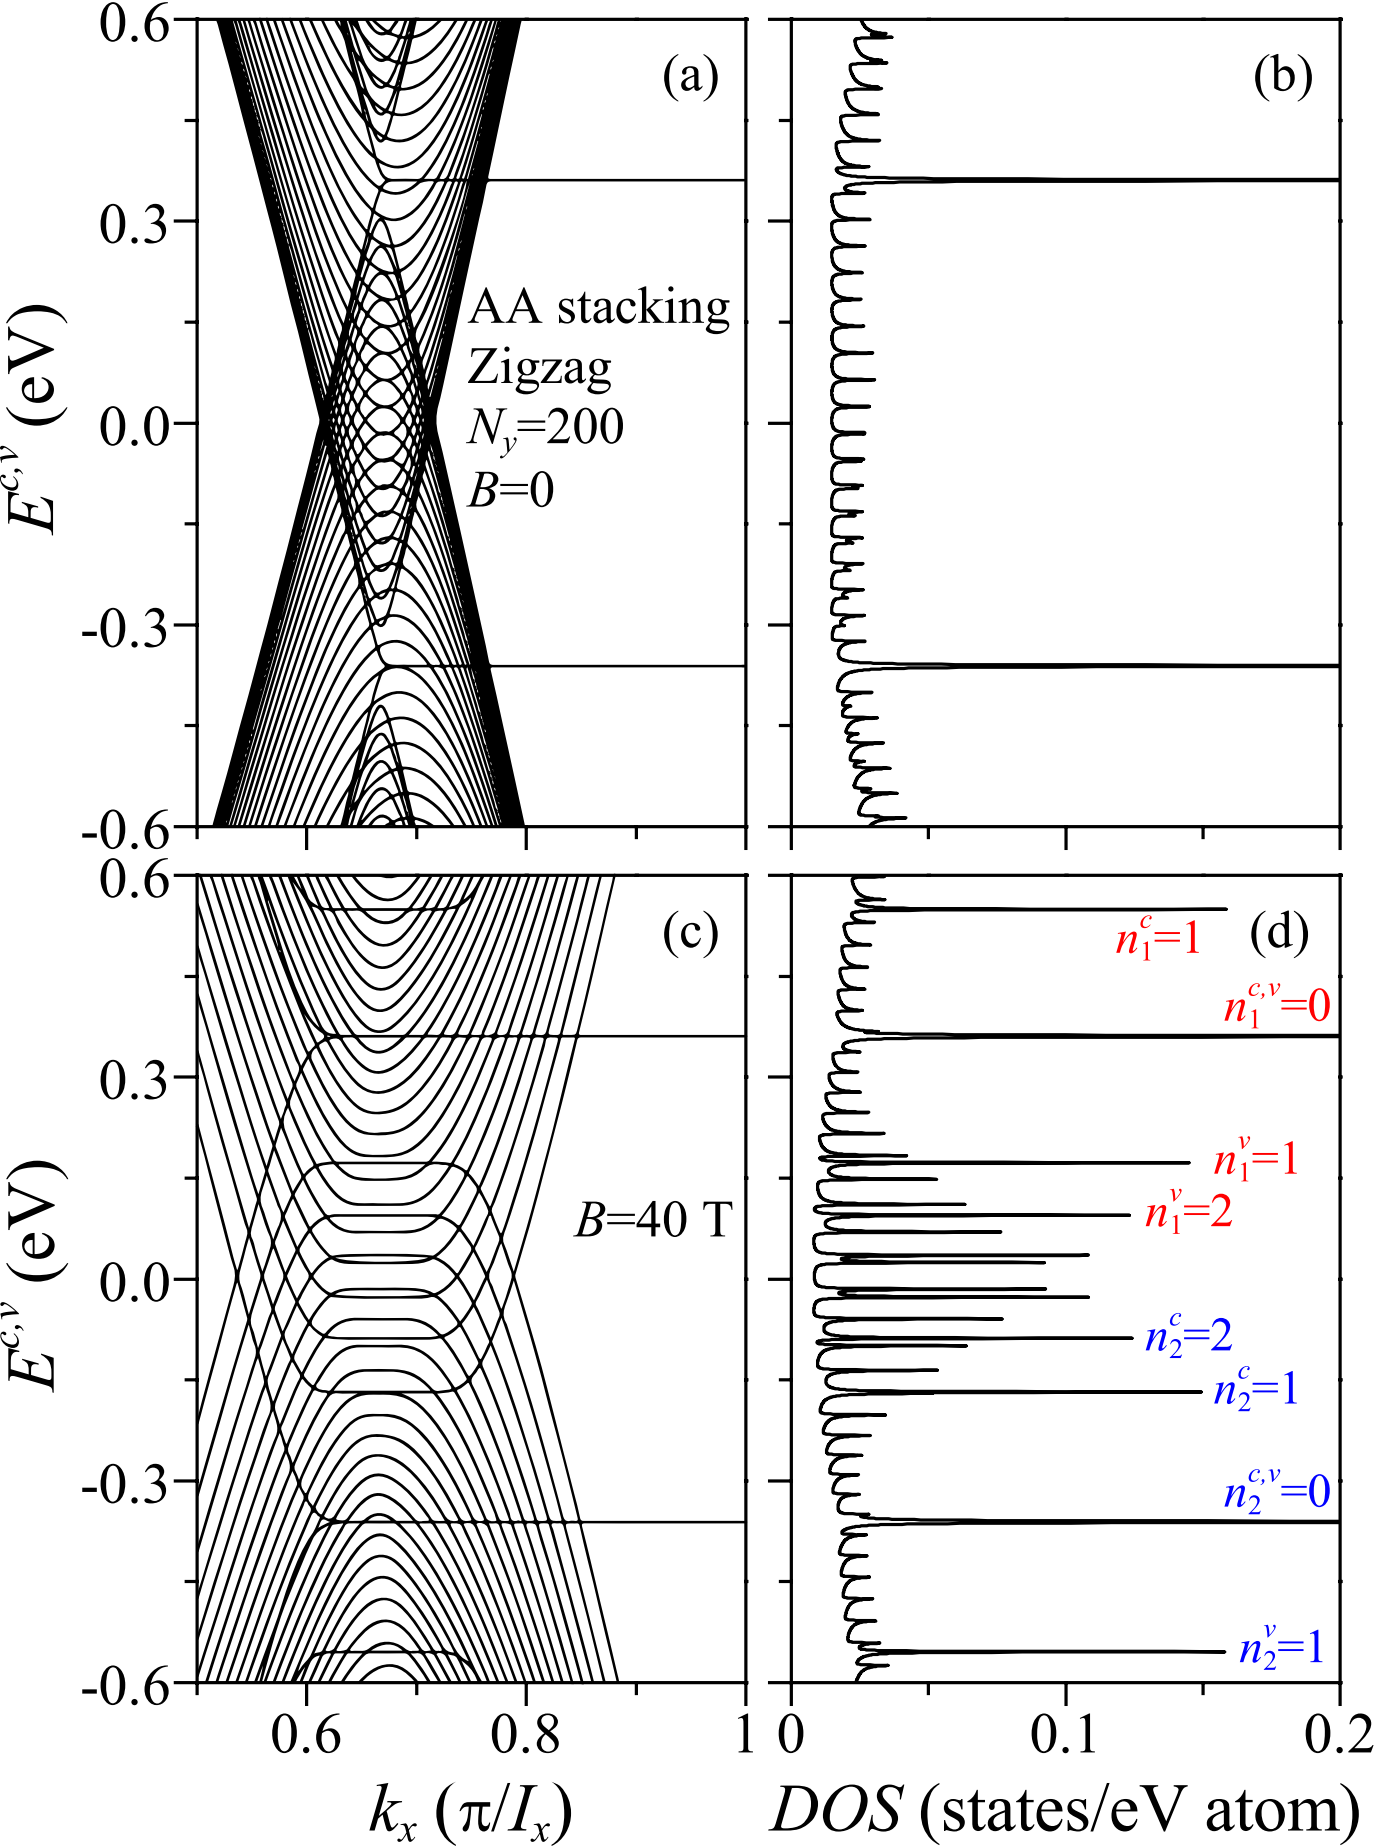

Supplement: c5cp06533j2.zip [file c5cp06533j2.zip]

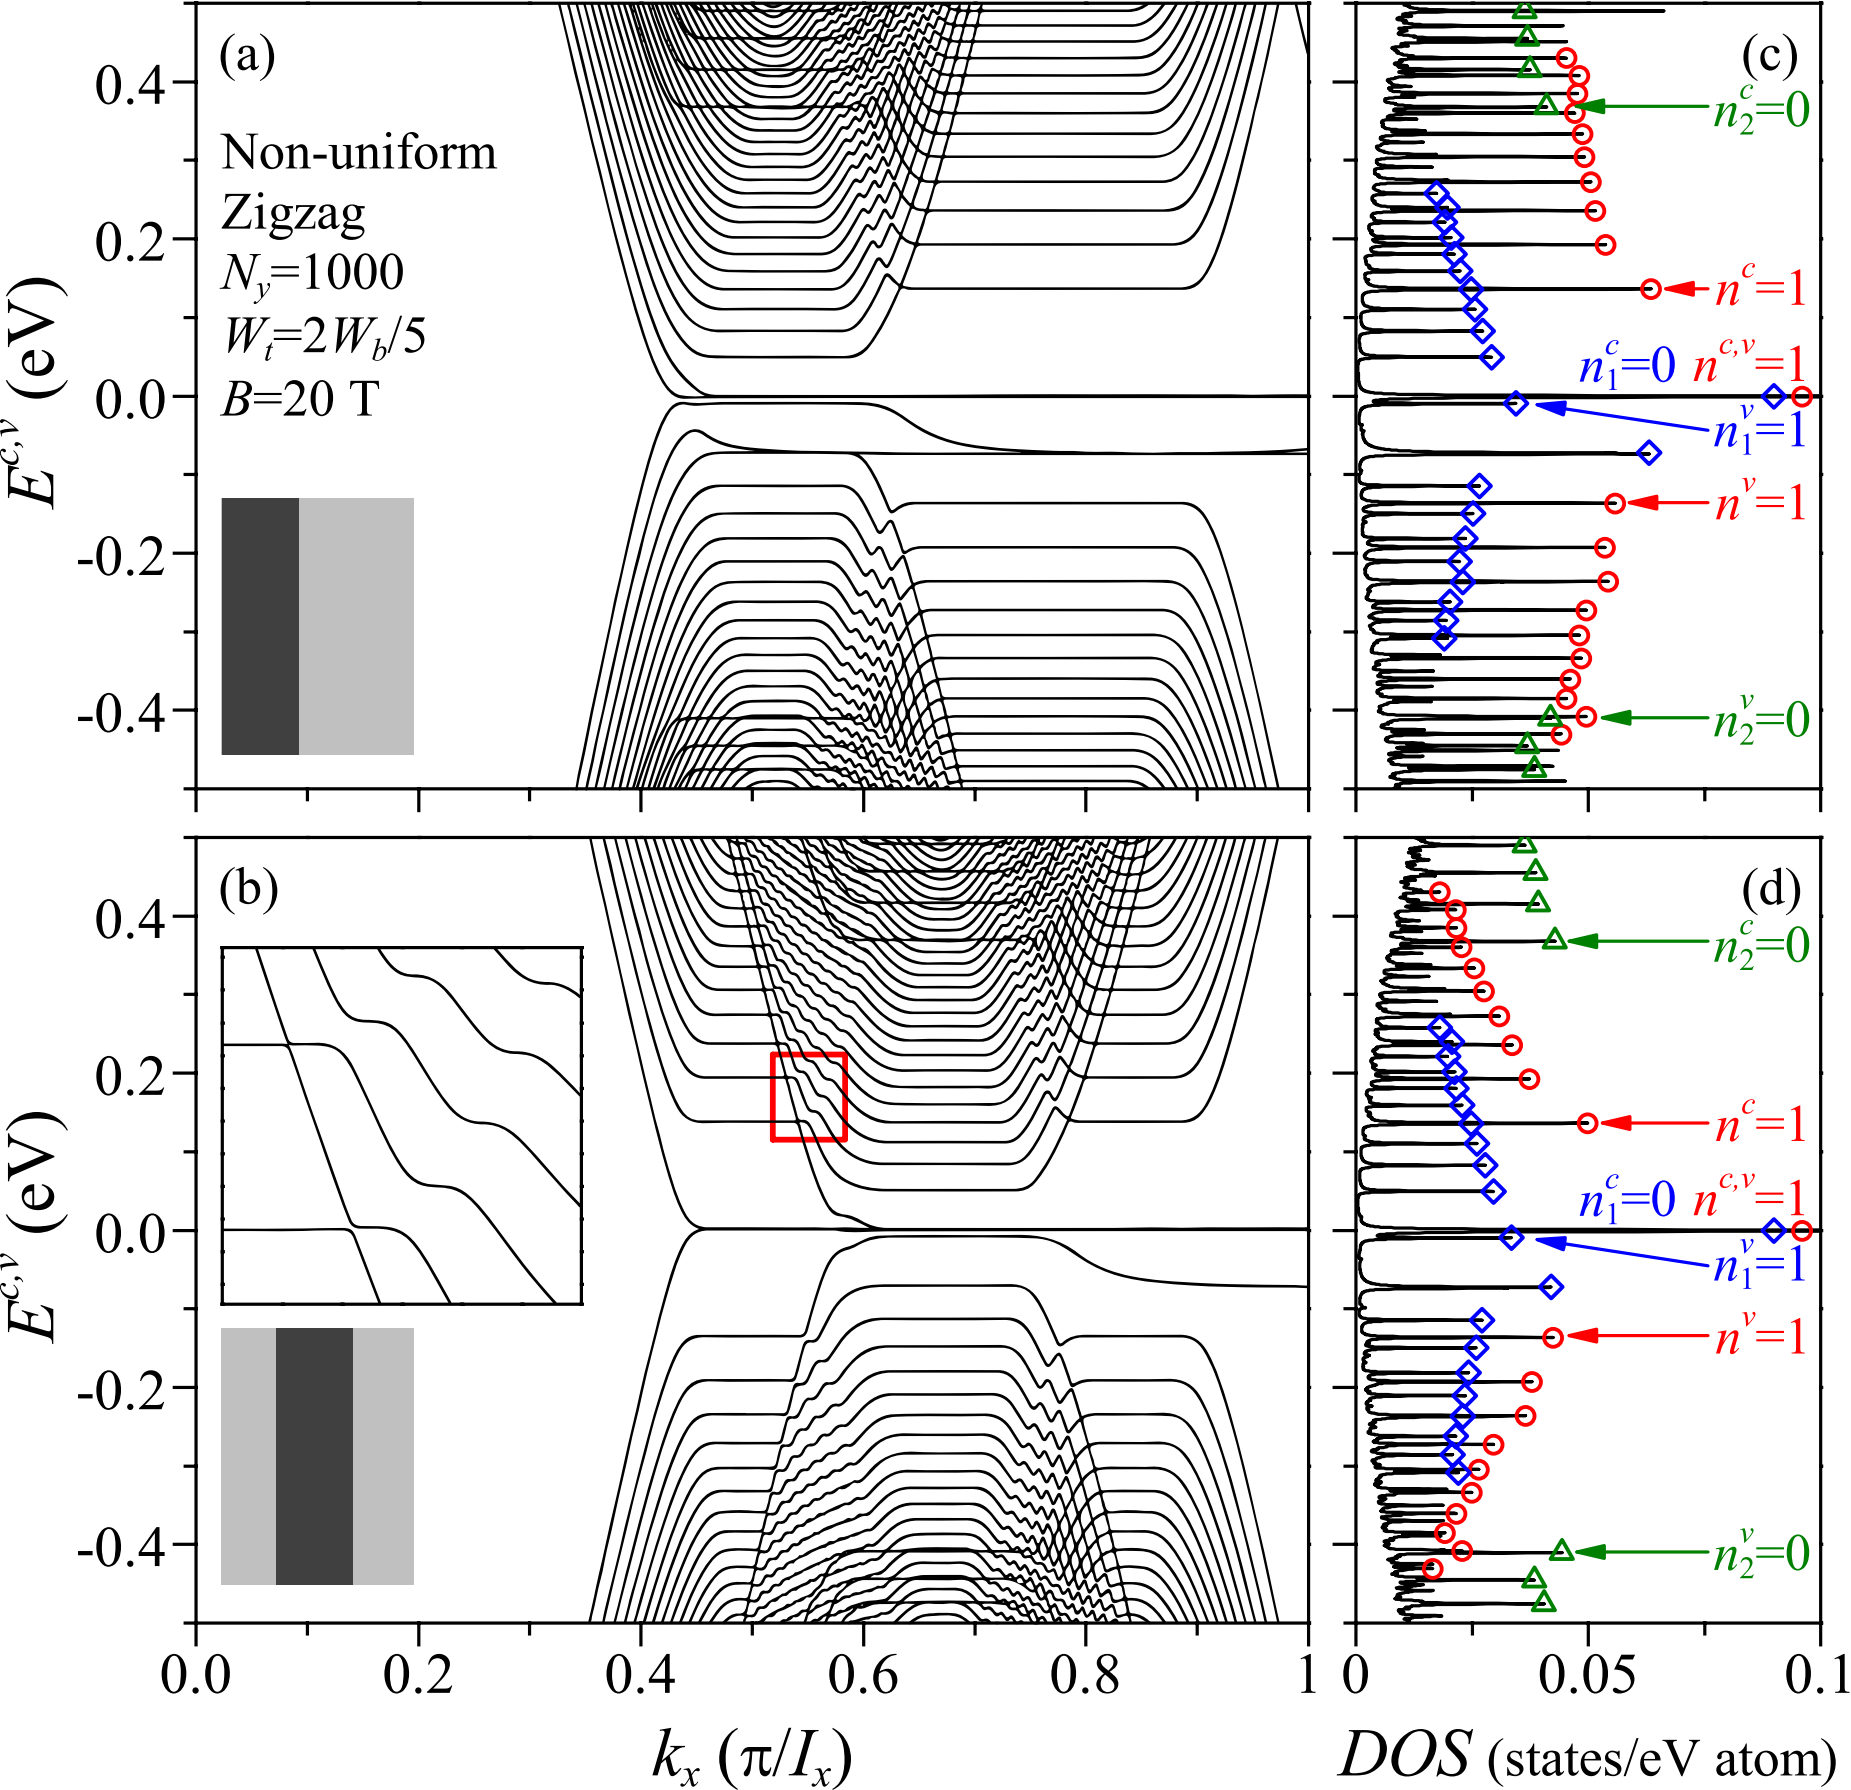

Supplement: c5cp06533j2.zip [file c5cp06533j2.zip]

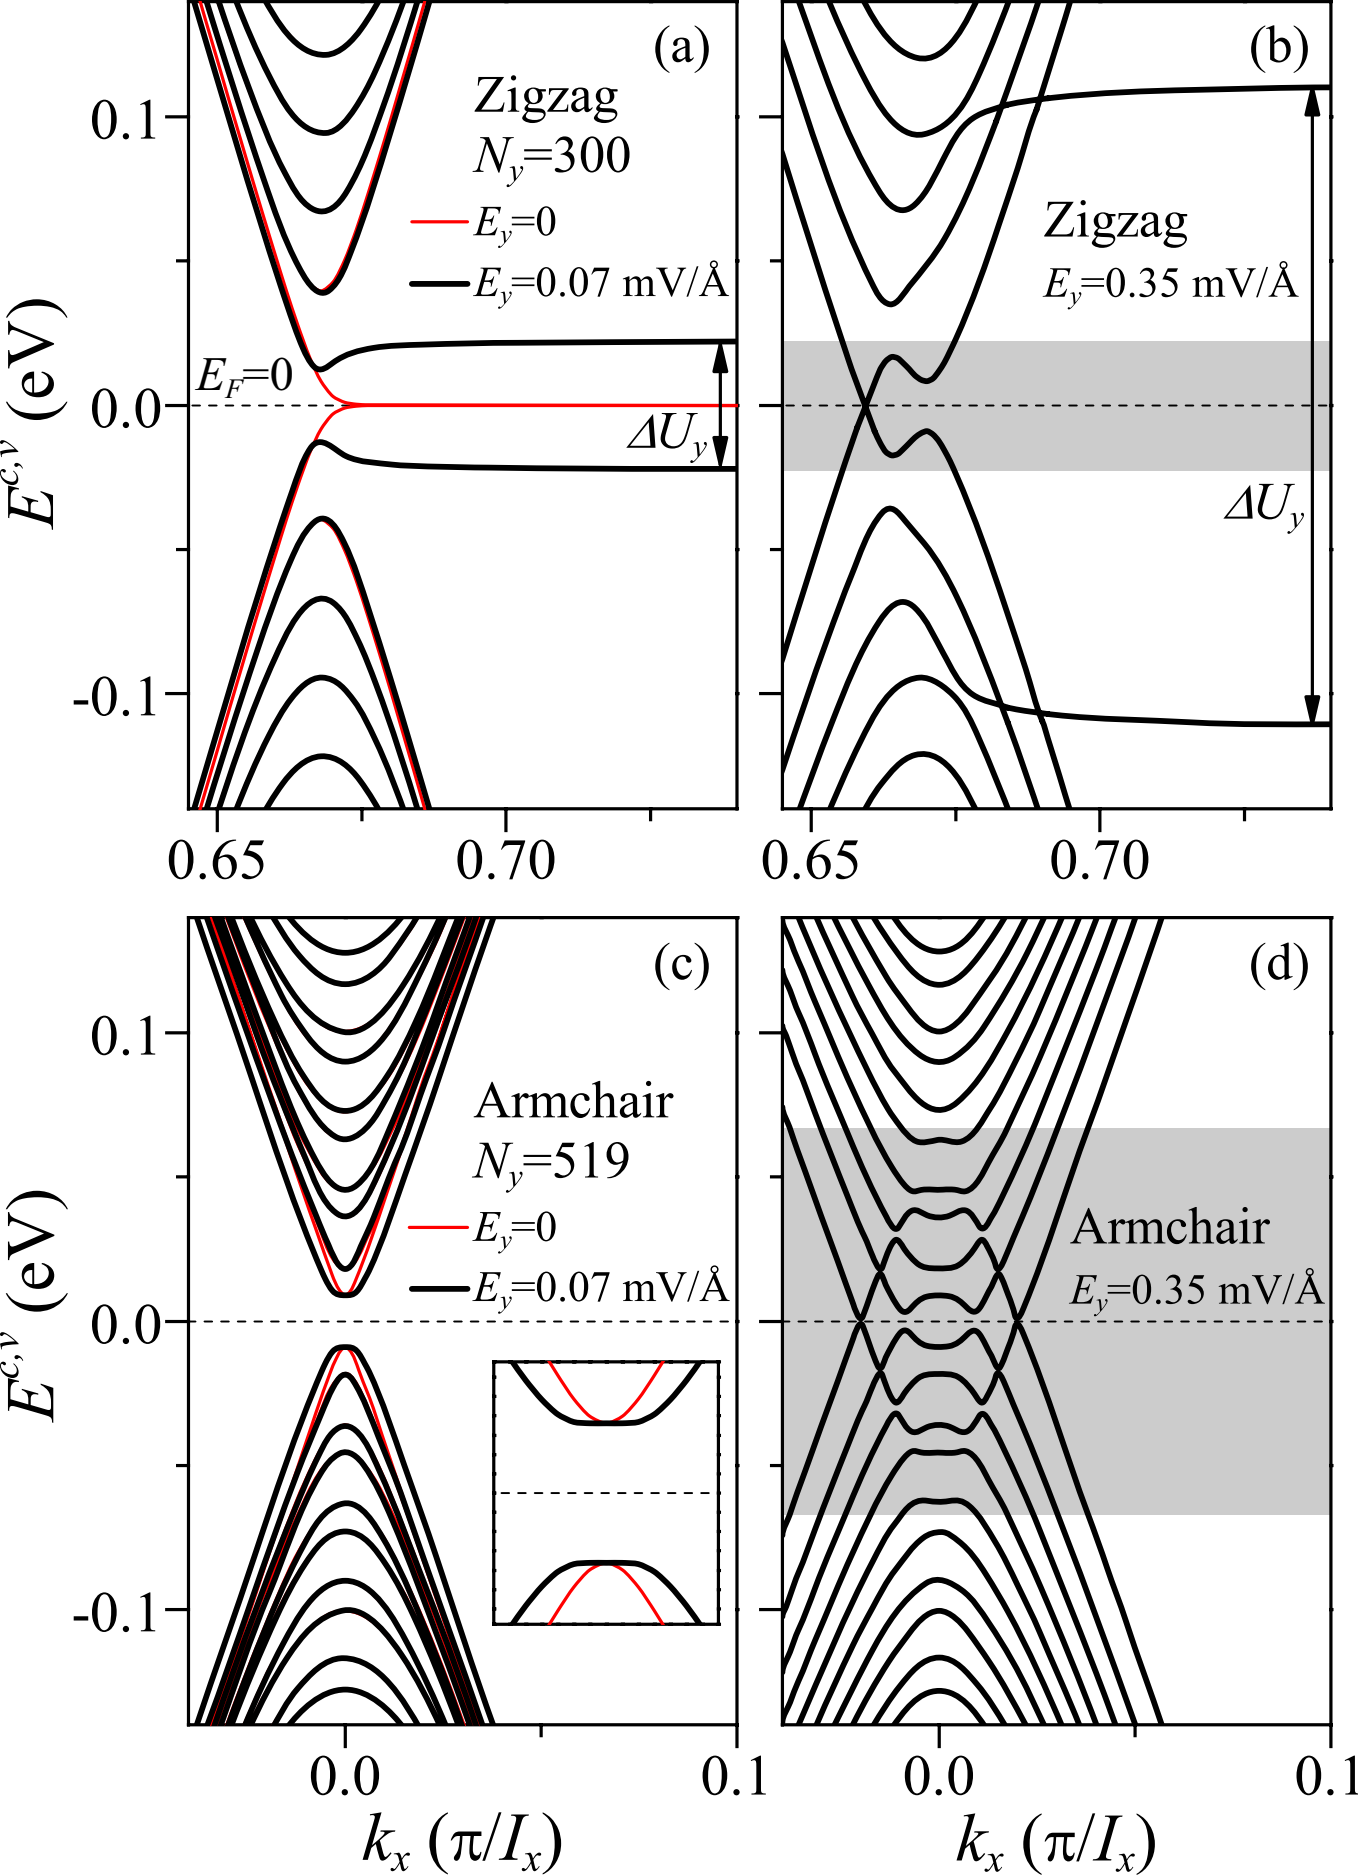

Supplement: c5cp06533j2.zip [file c5cp06533j2.zip]

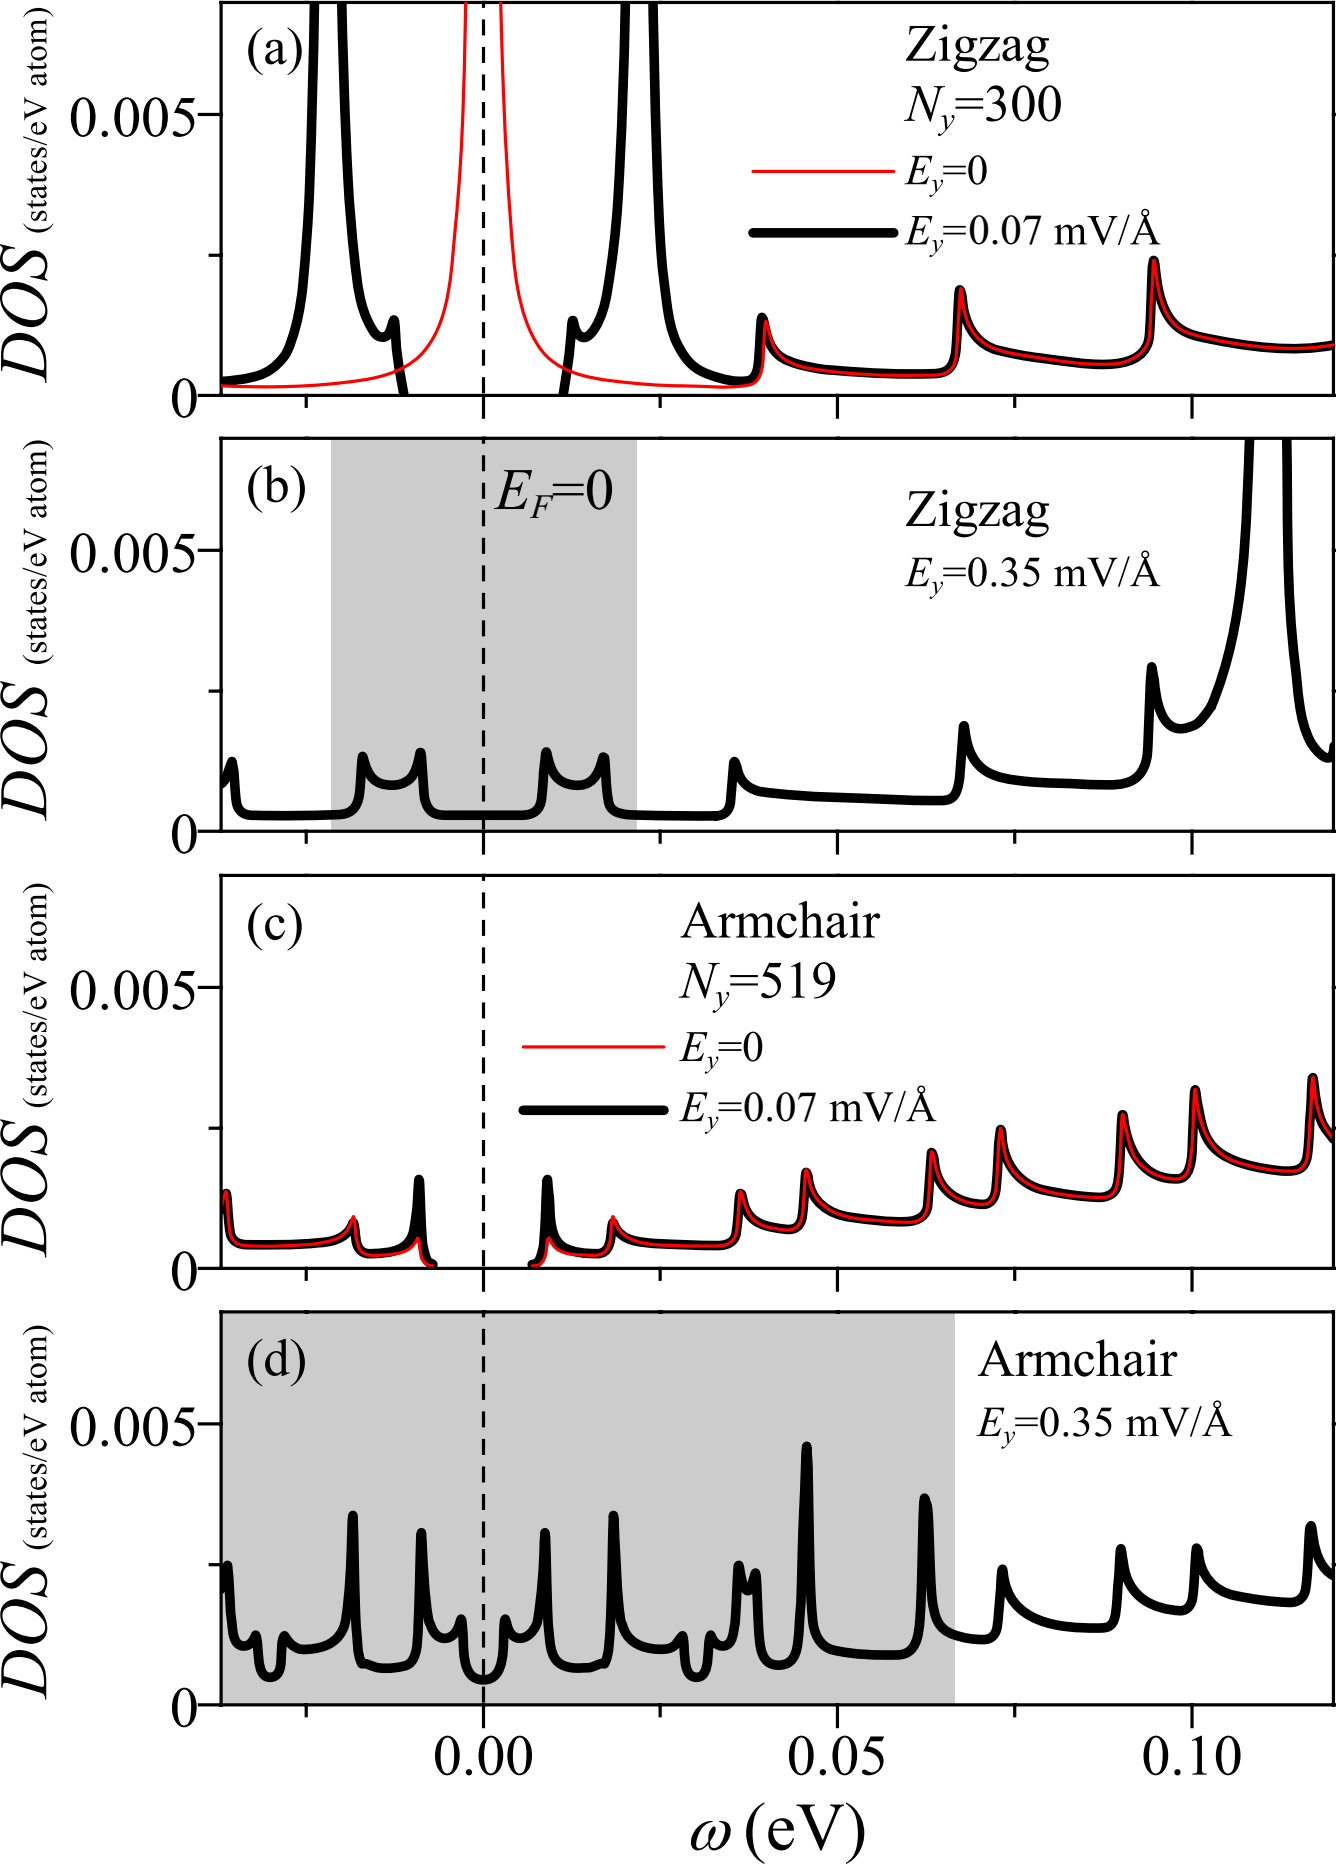

Supplement: c5cp06533j2.zip [file c5cp06533j2.zip]

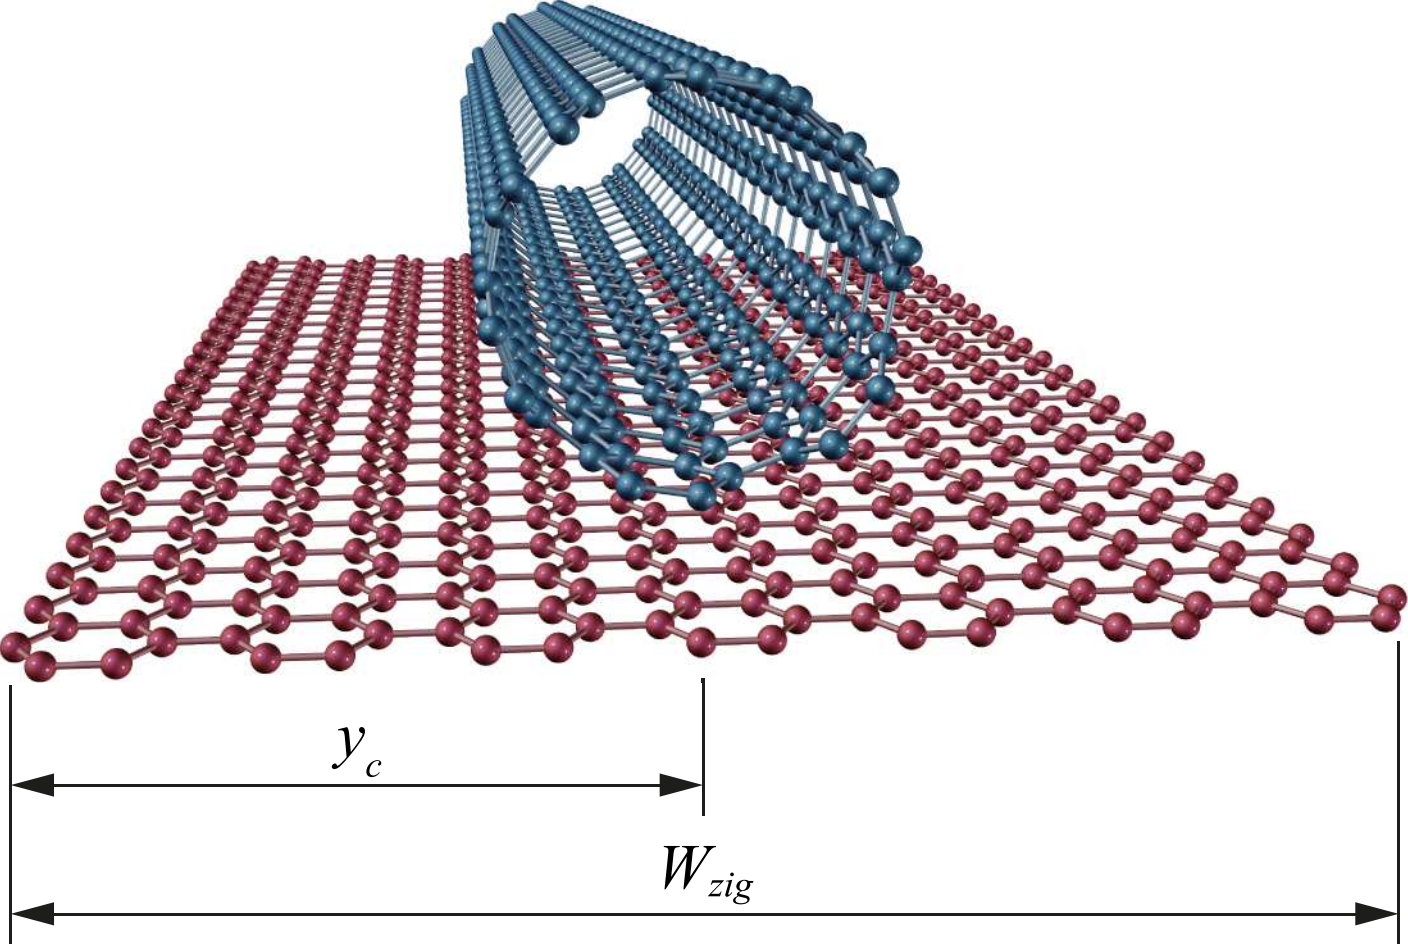

Supplement: c5cp06533j2.zip [file c5cp06533j2.zip]

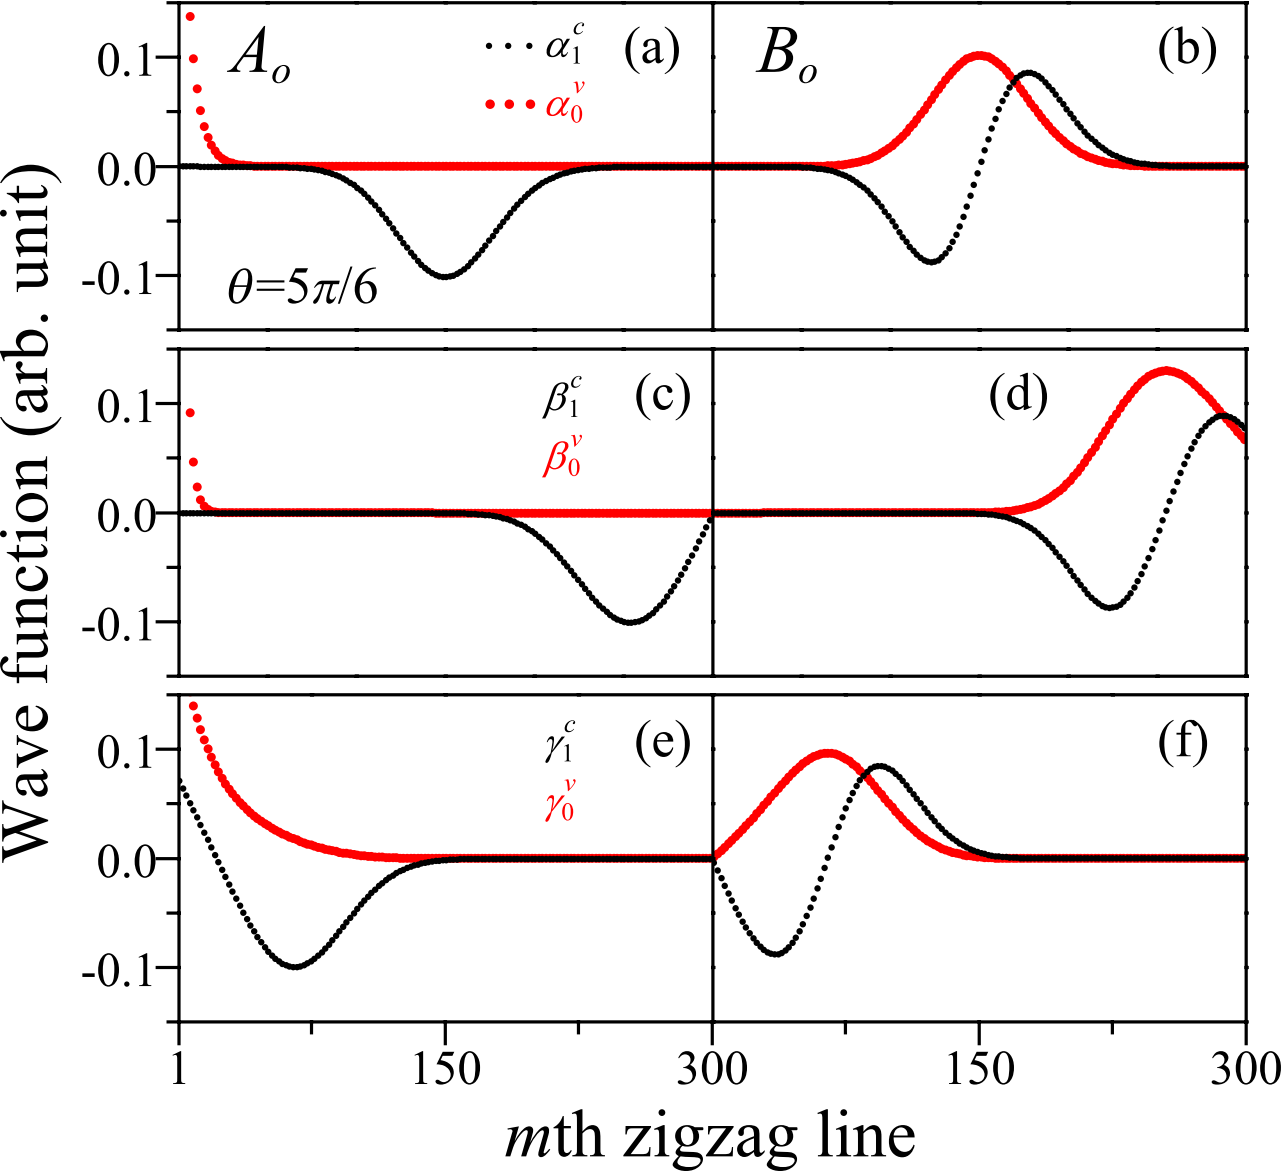

Supplement: c5cp06533j2.zip [file c5cp06533j2.zip]

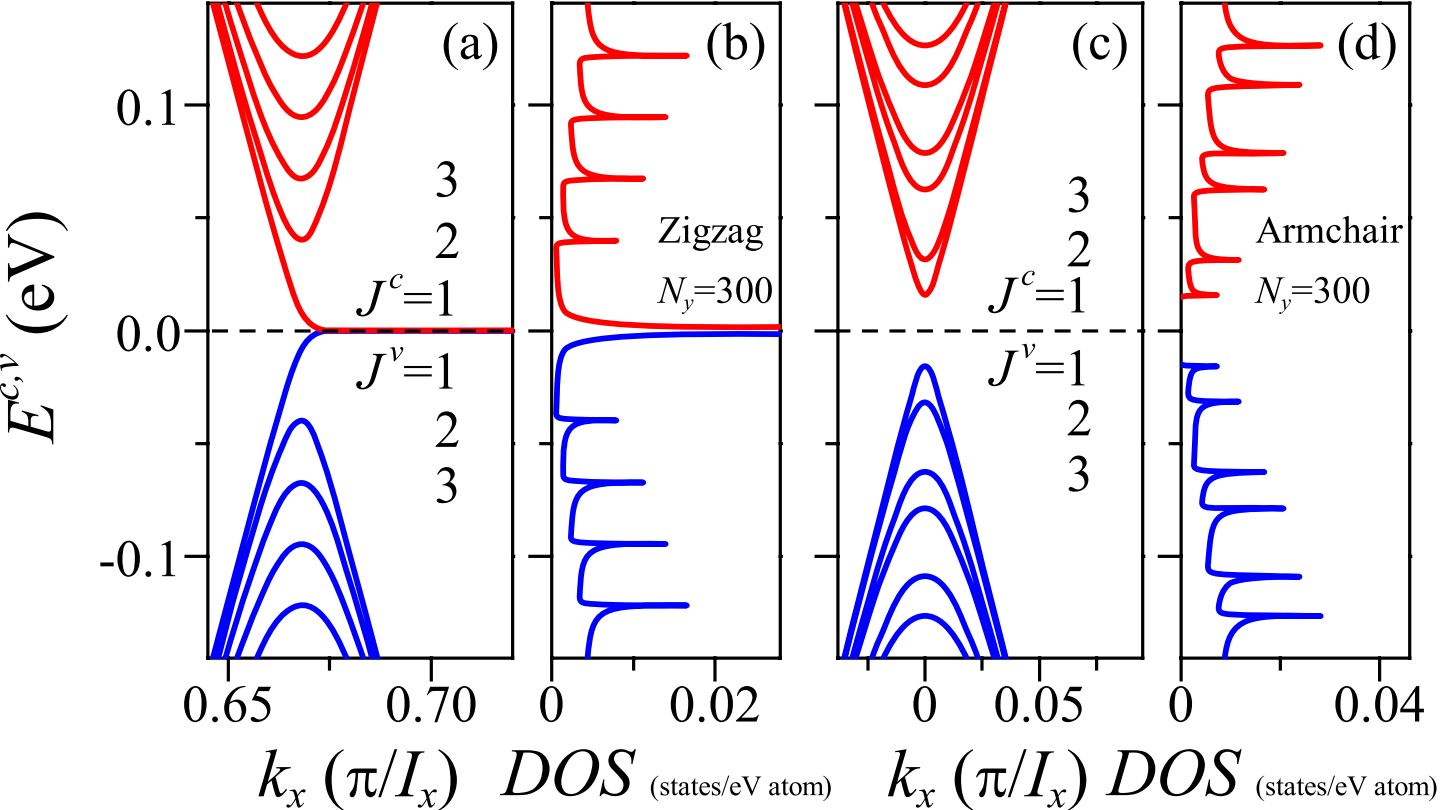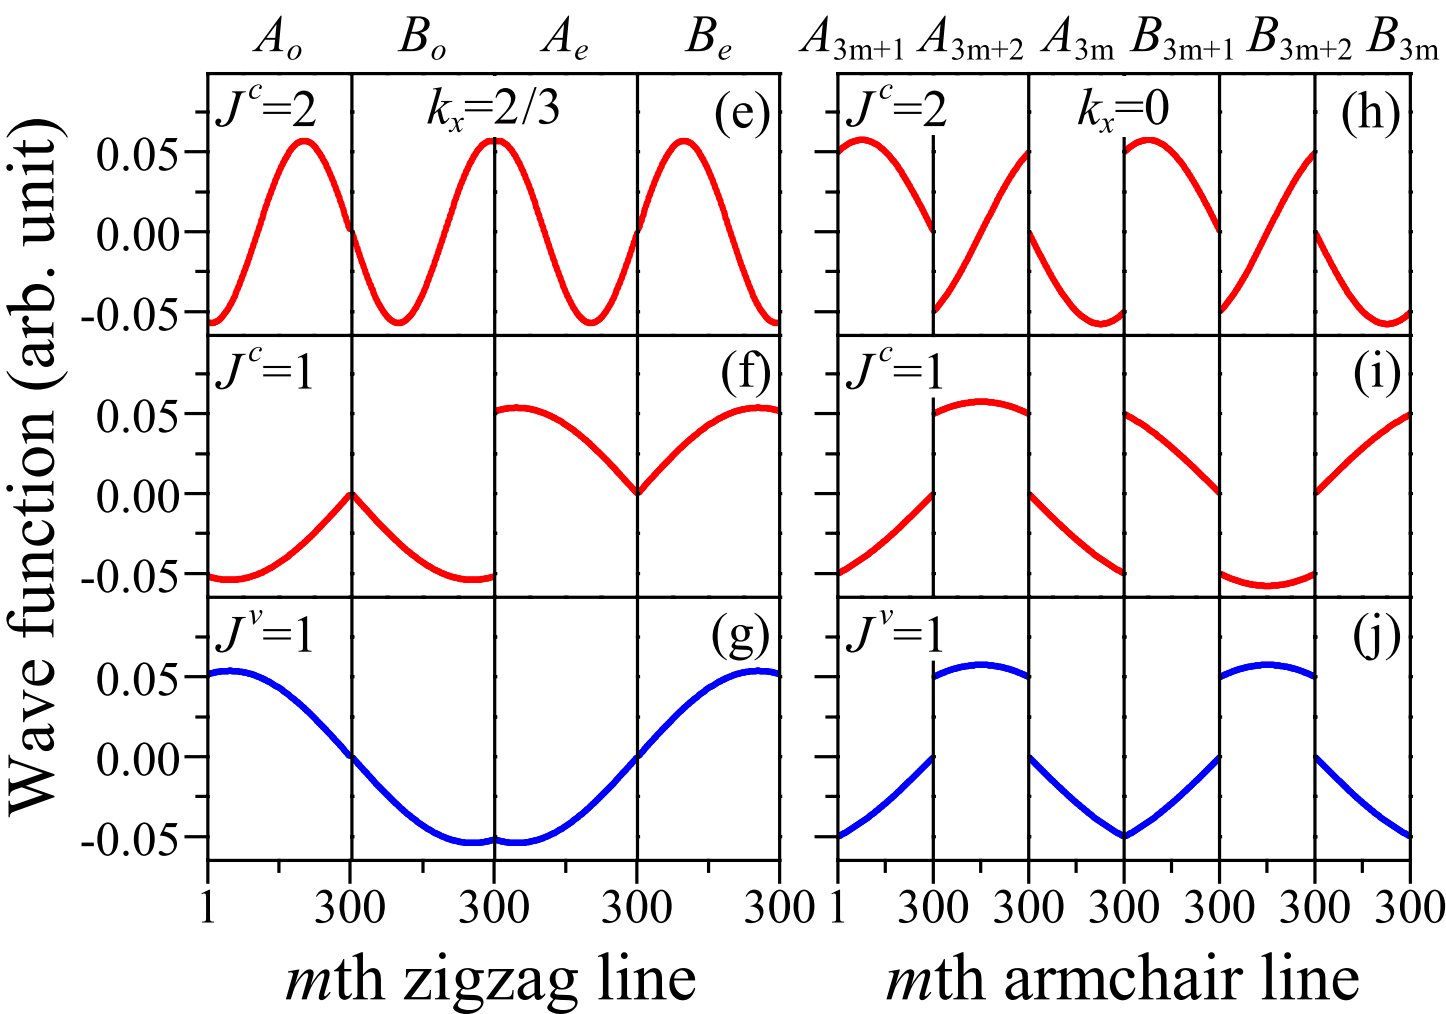

Supplement: c5cp06533j2.zip [file c5cp06533j2.zip]

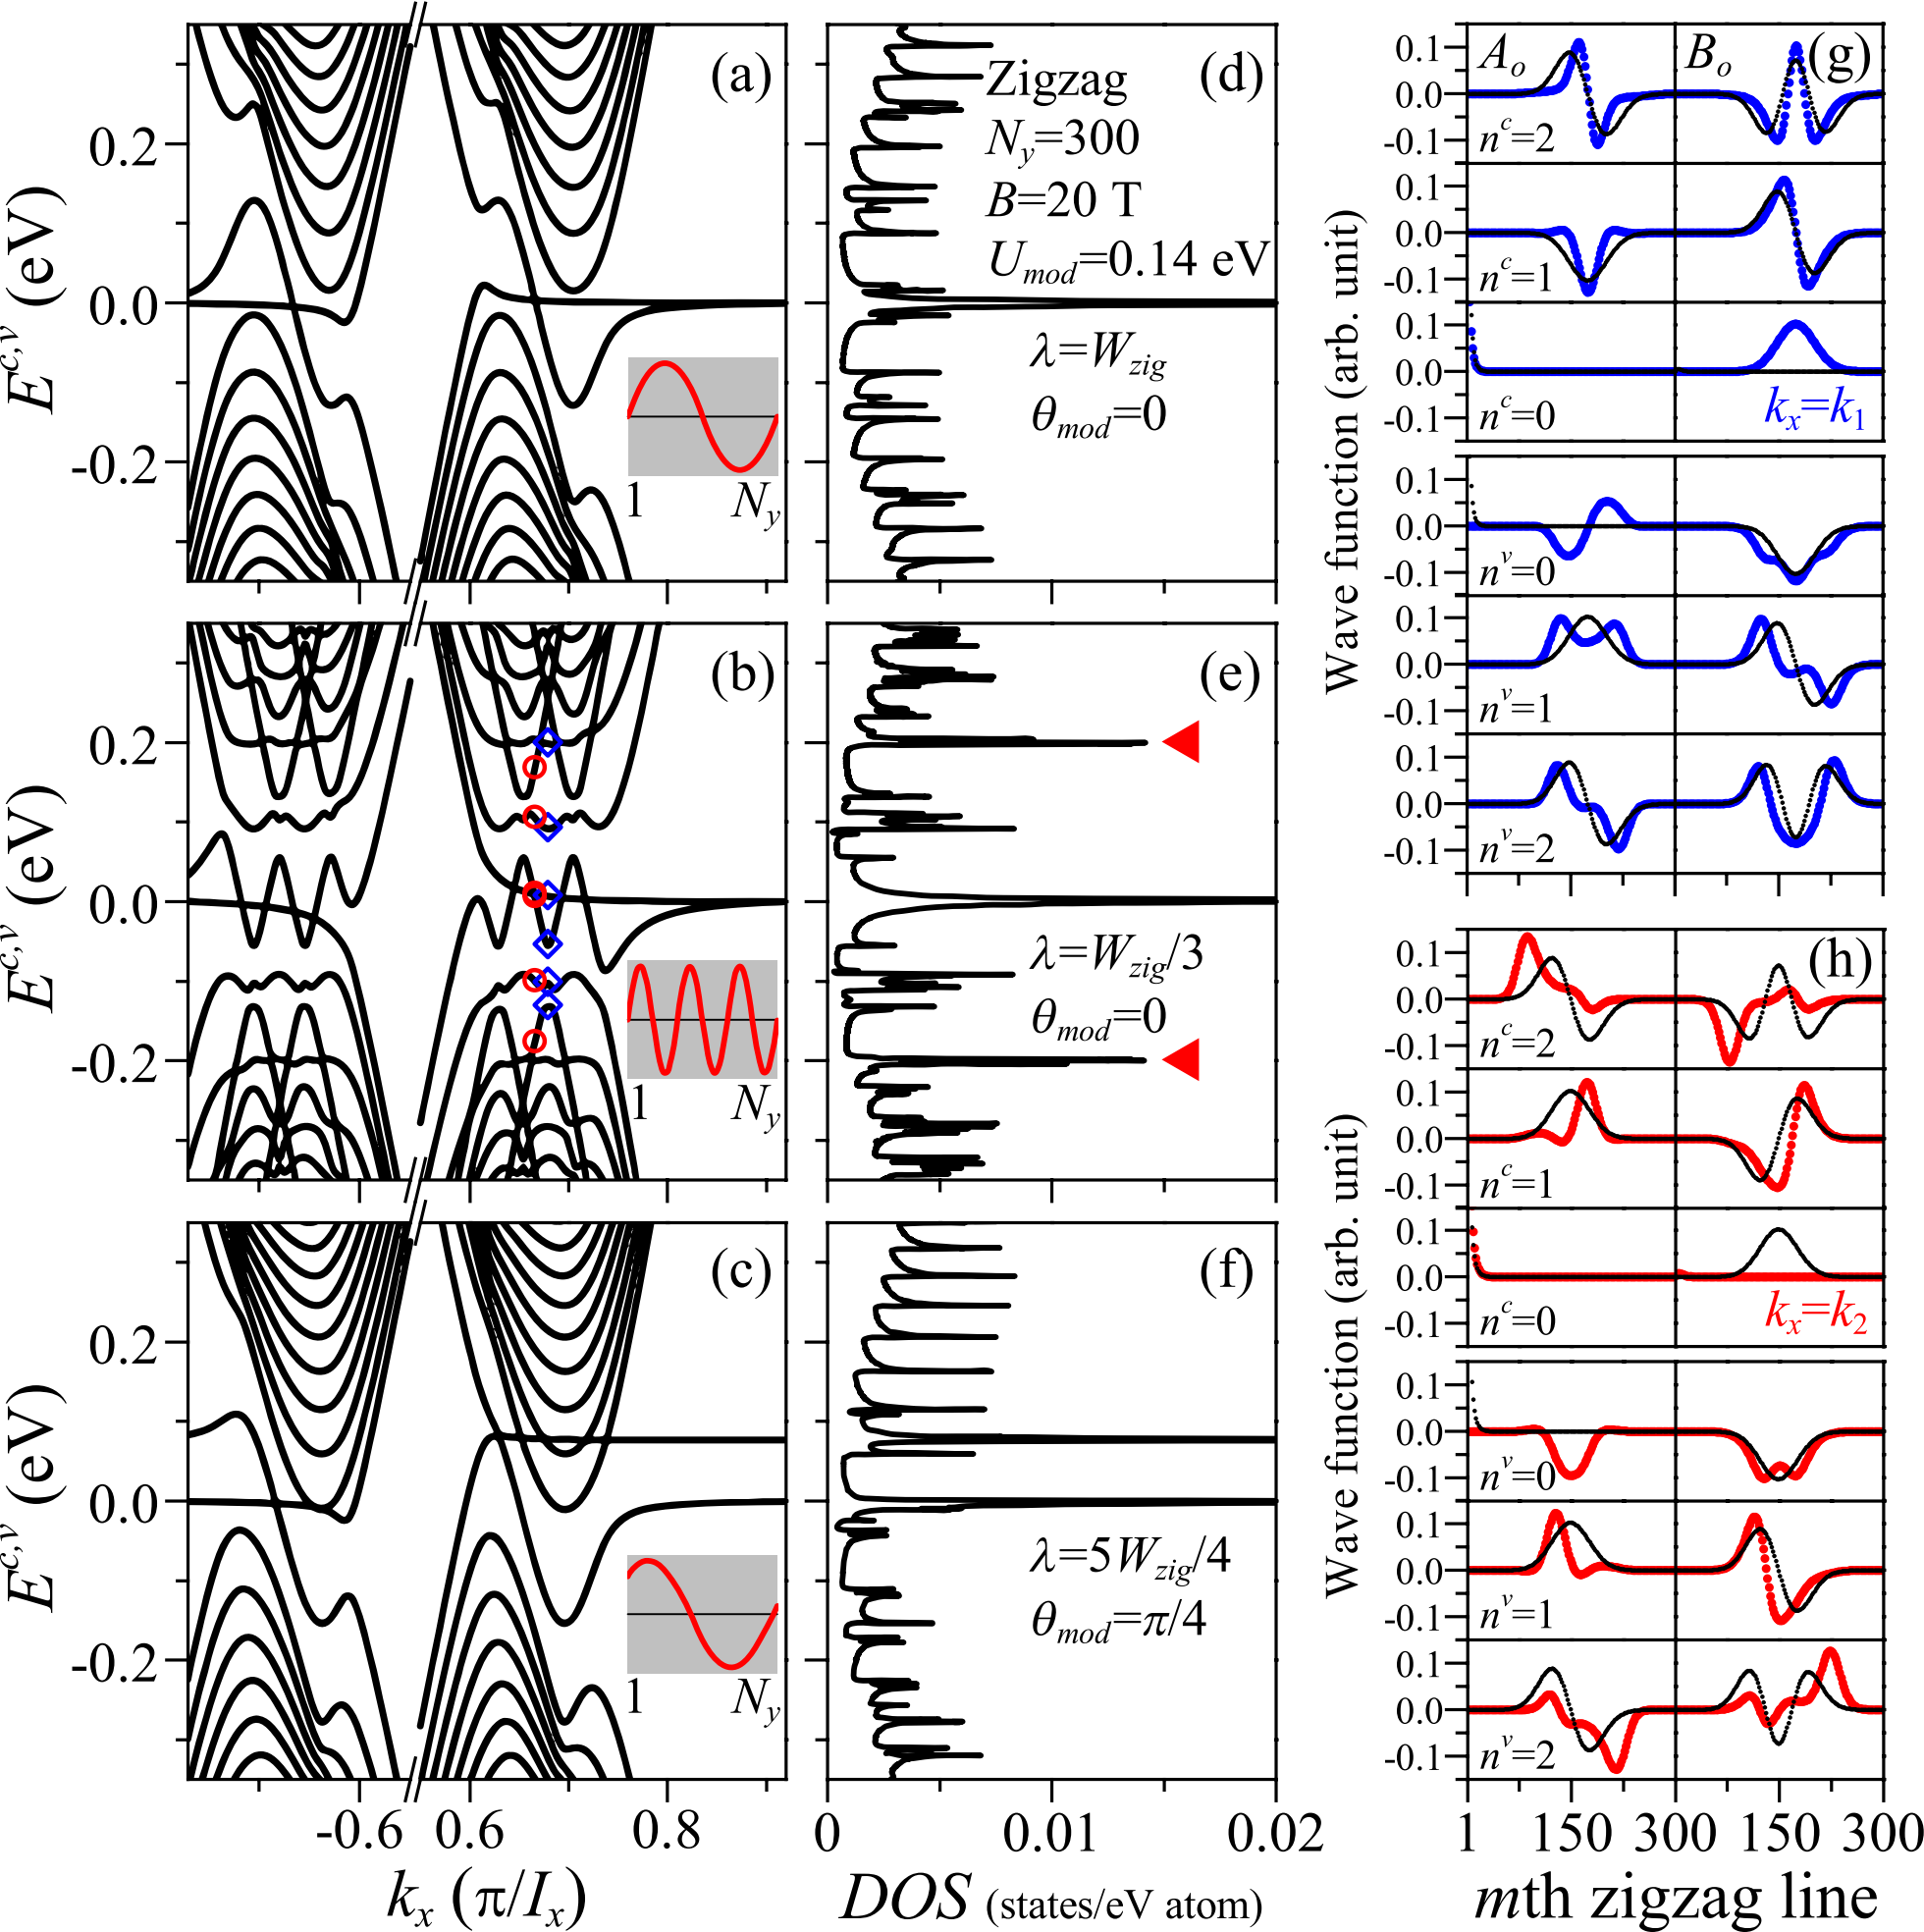

Supplement: c5cp06533j2.zip [file c5cp06533j2.zip]

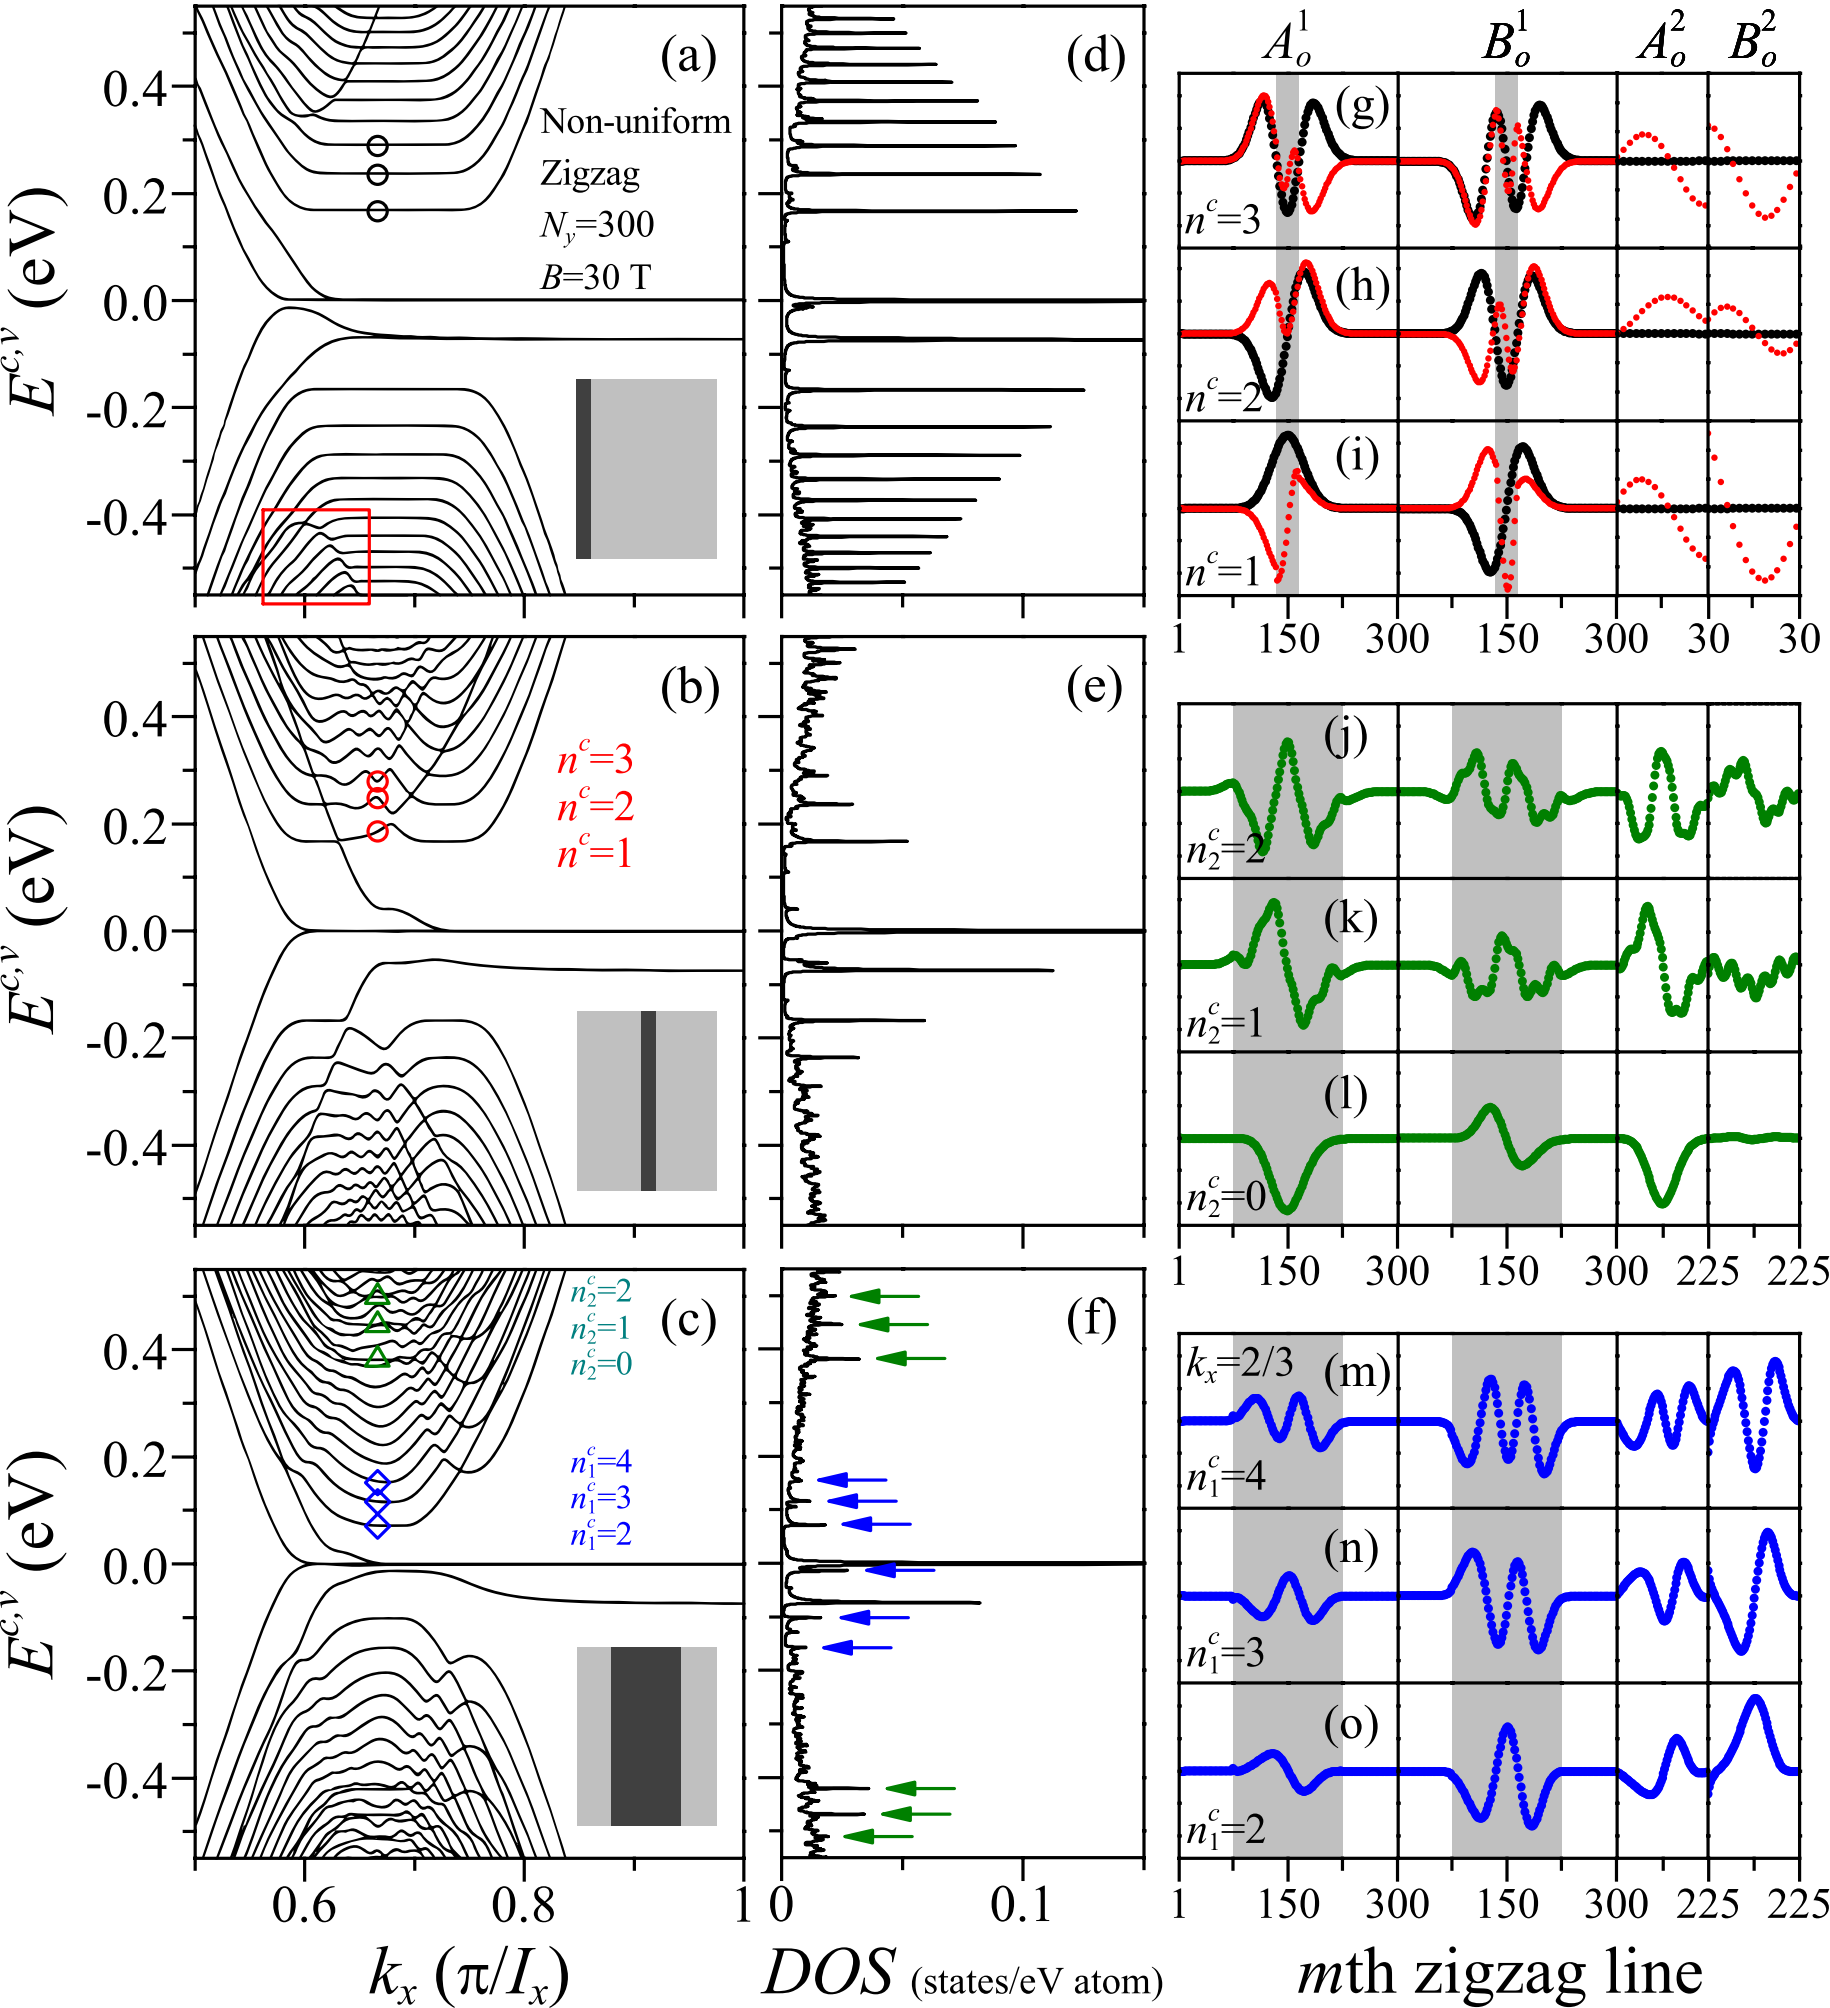

Supplement: c5cp06533j2.zip [file c5cp06533j2.zip]

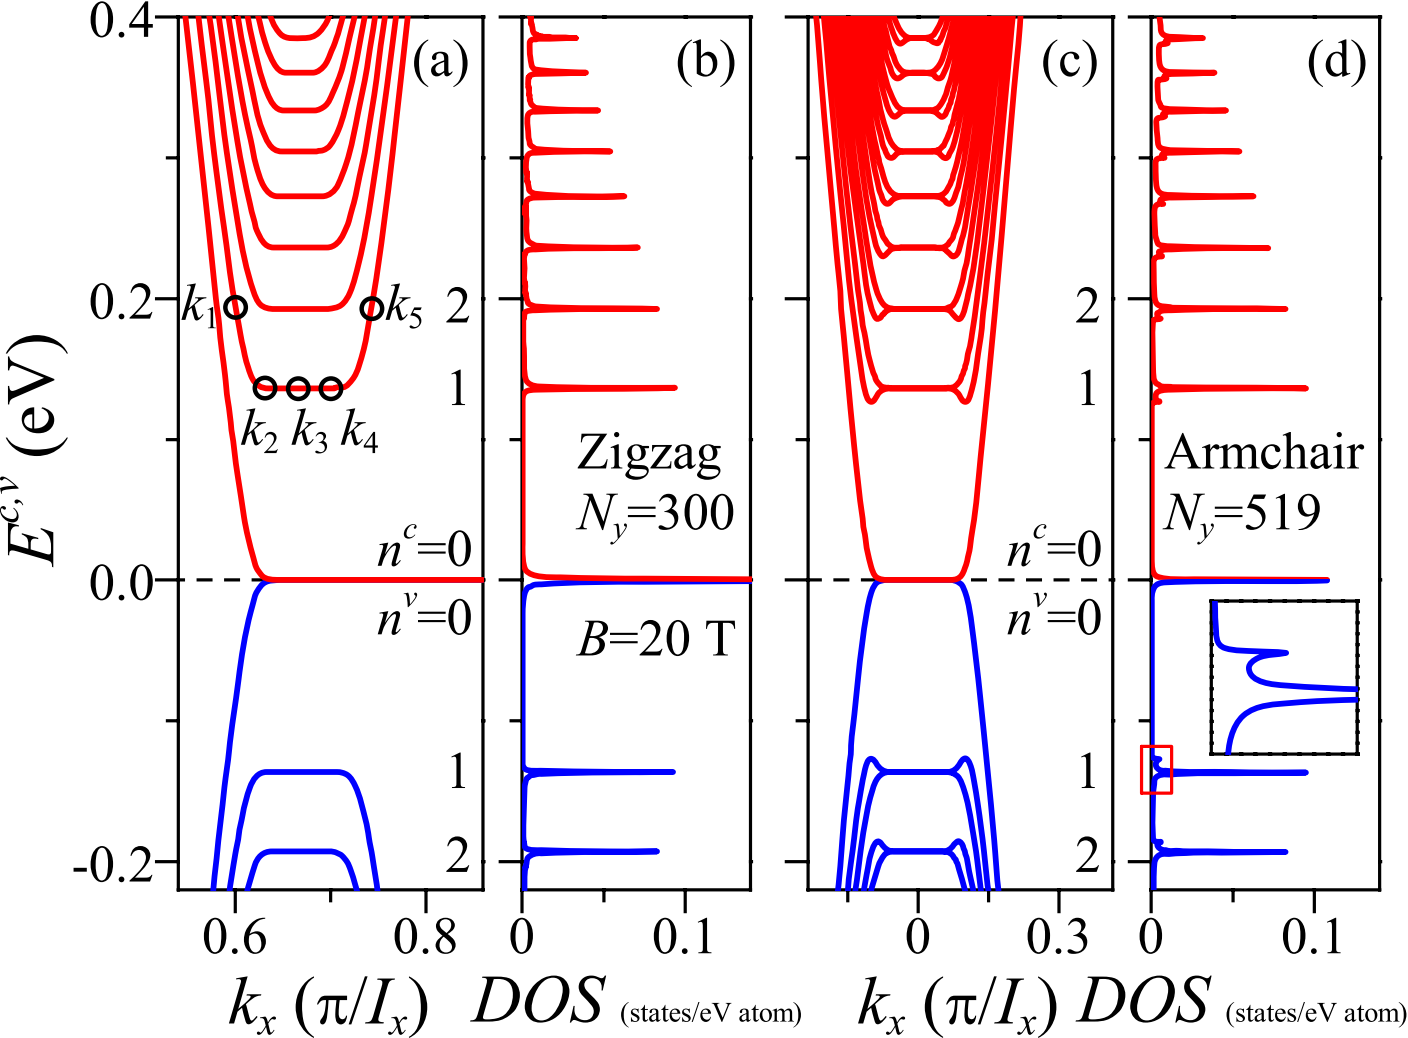

Supplement: c5cp06533j2.zip [file c5cp06533j2.zip]

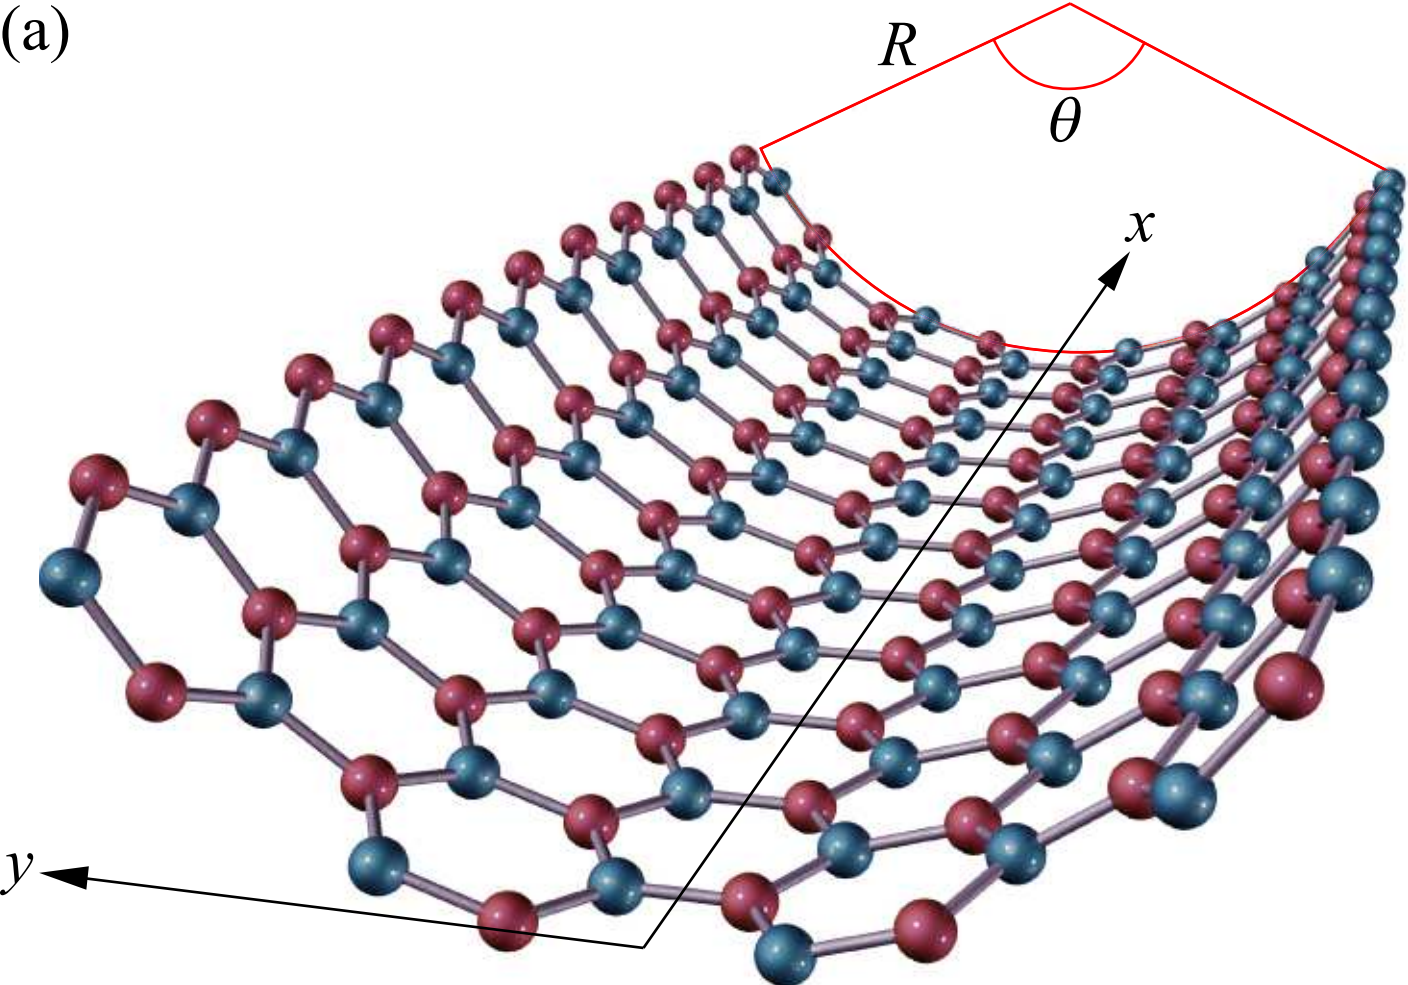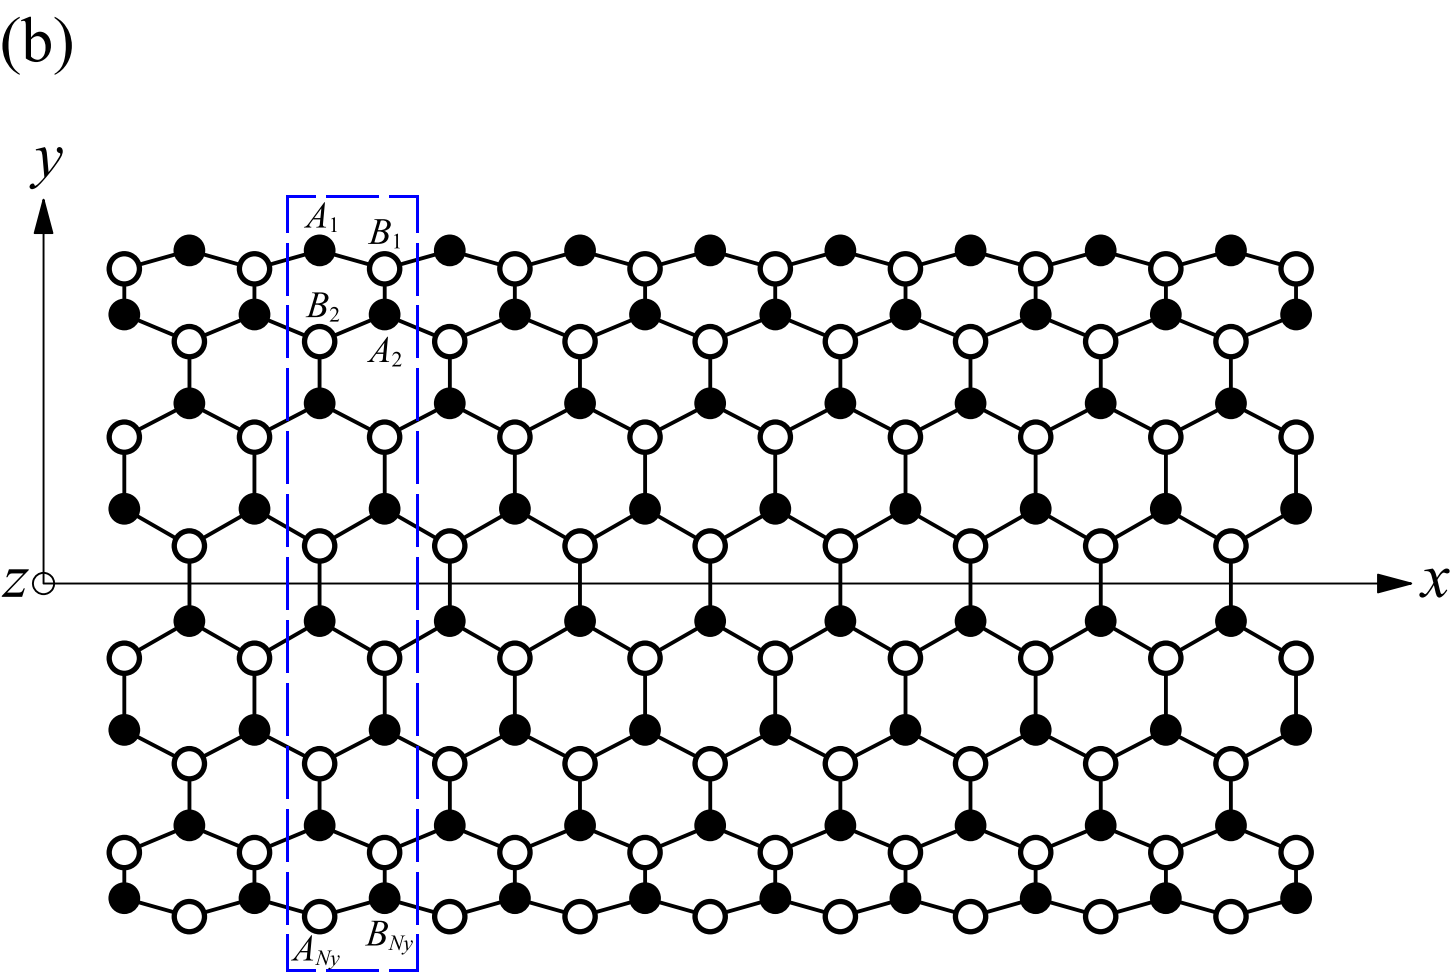

Supplement: c5cp06533j2.zip [file c5cp06533j2.zip]

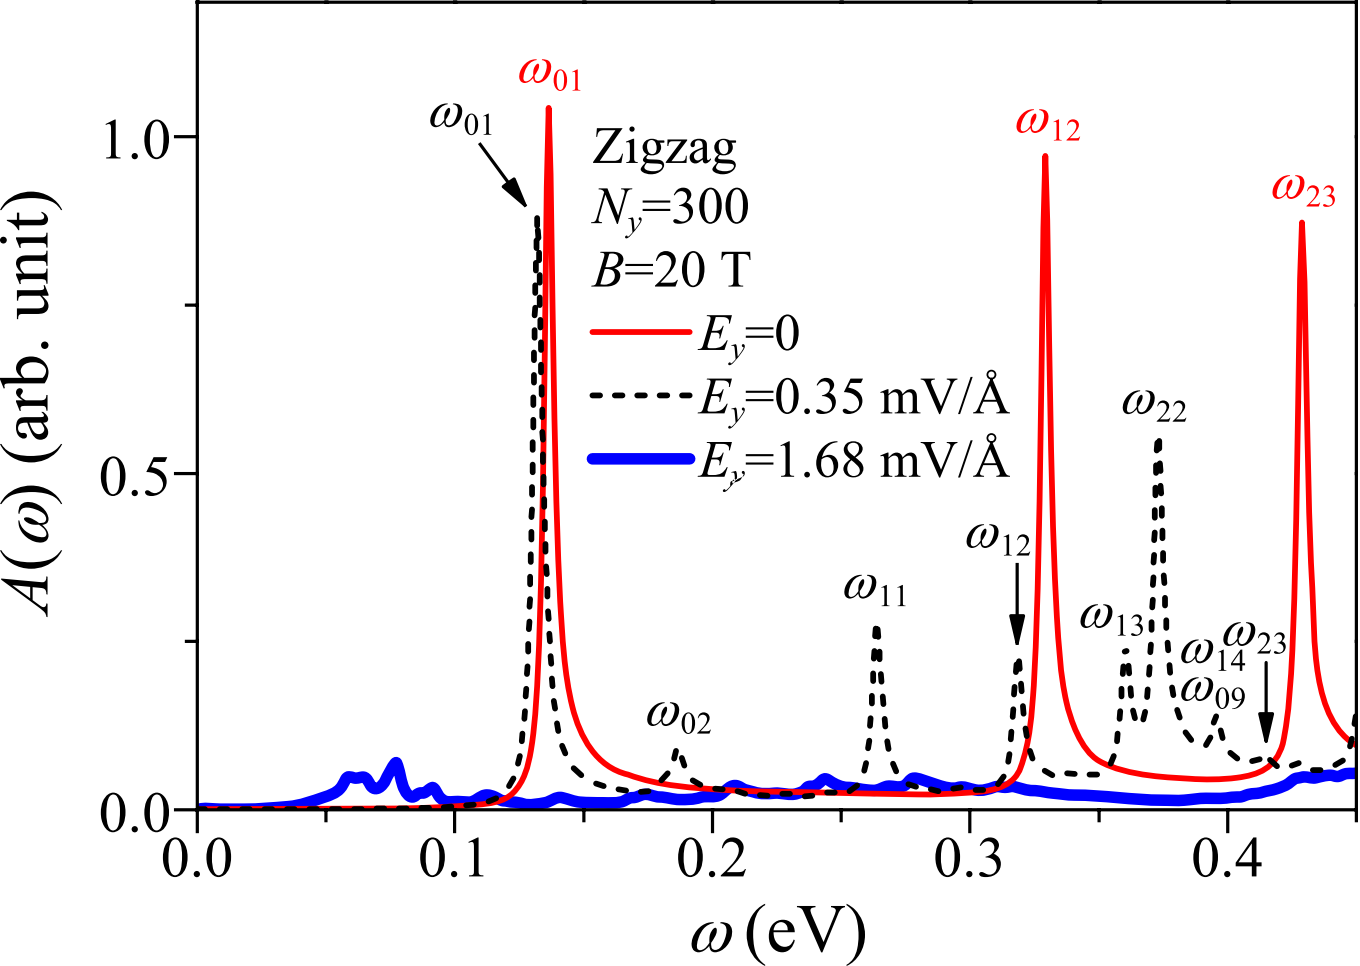

Supplement: c5cp06533j2.zip [file c5cp06533j2.zip]

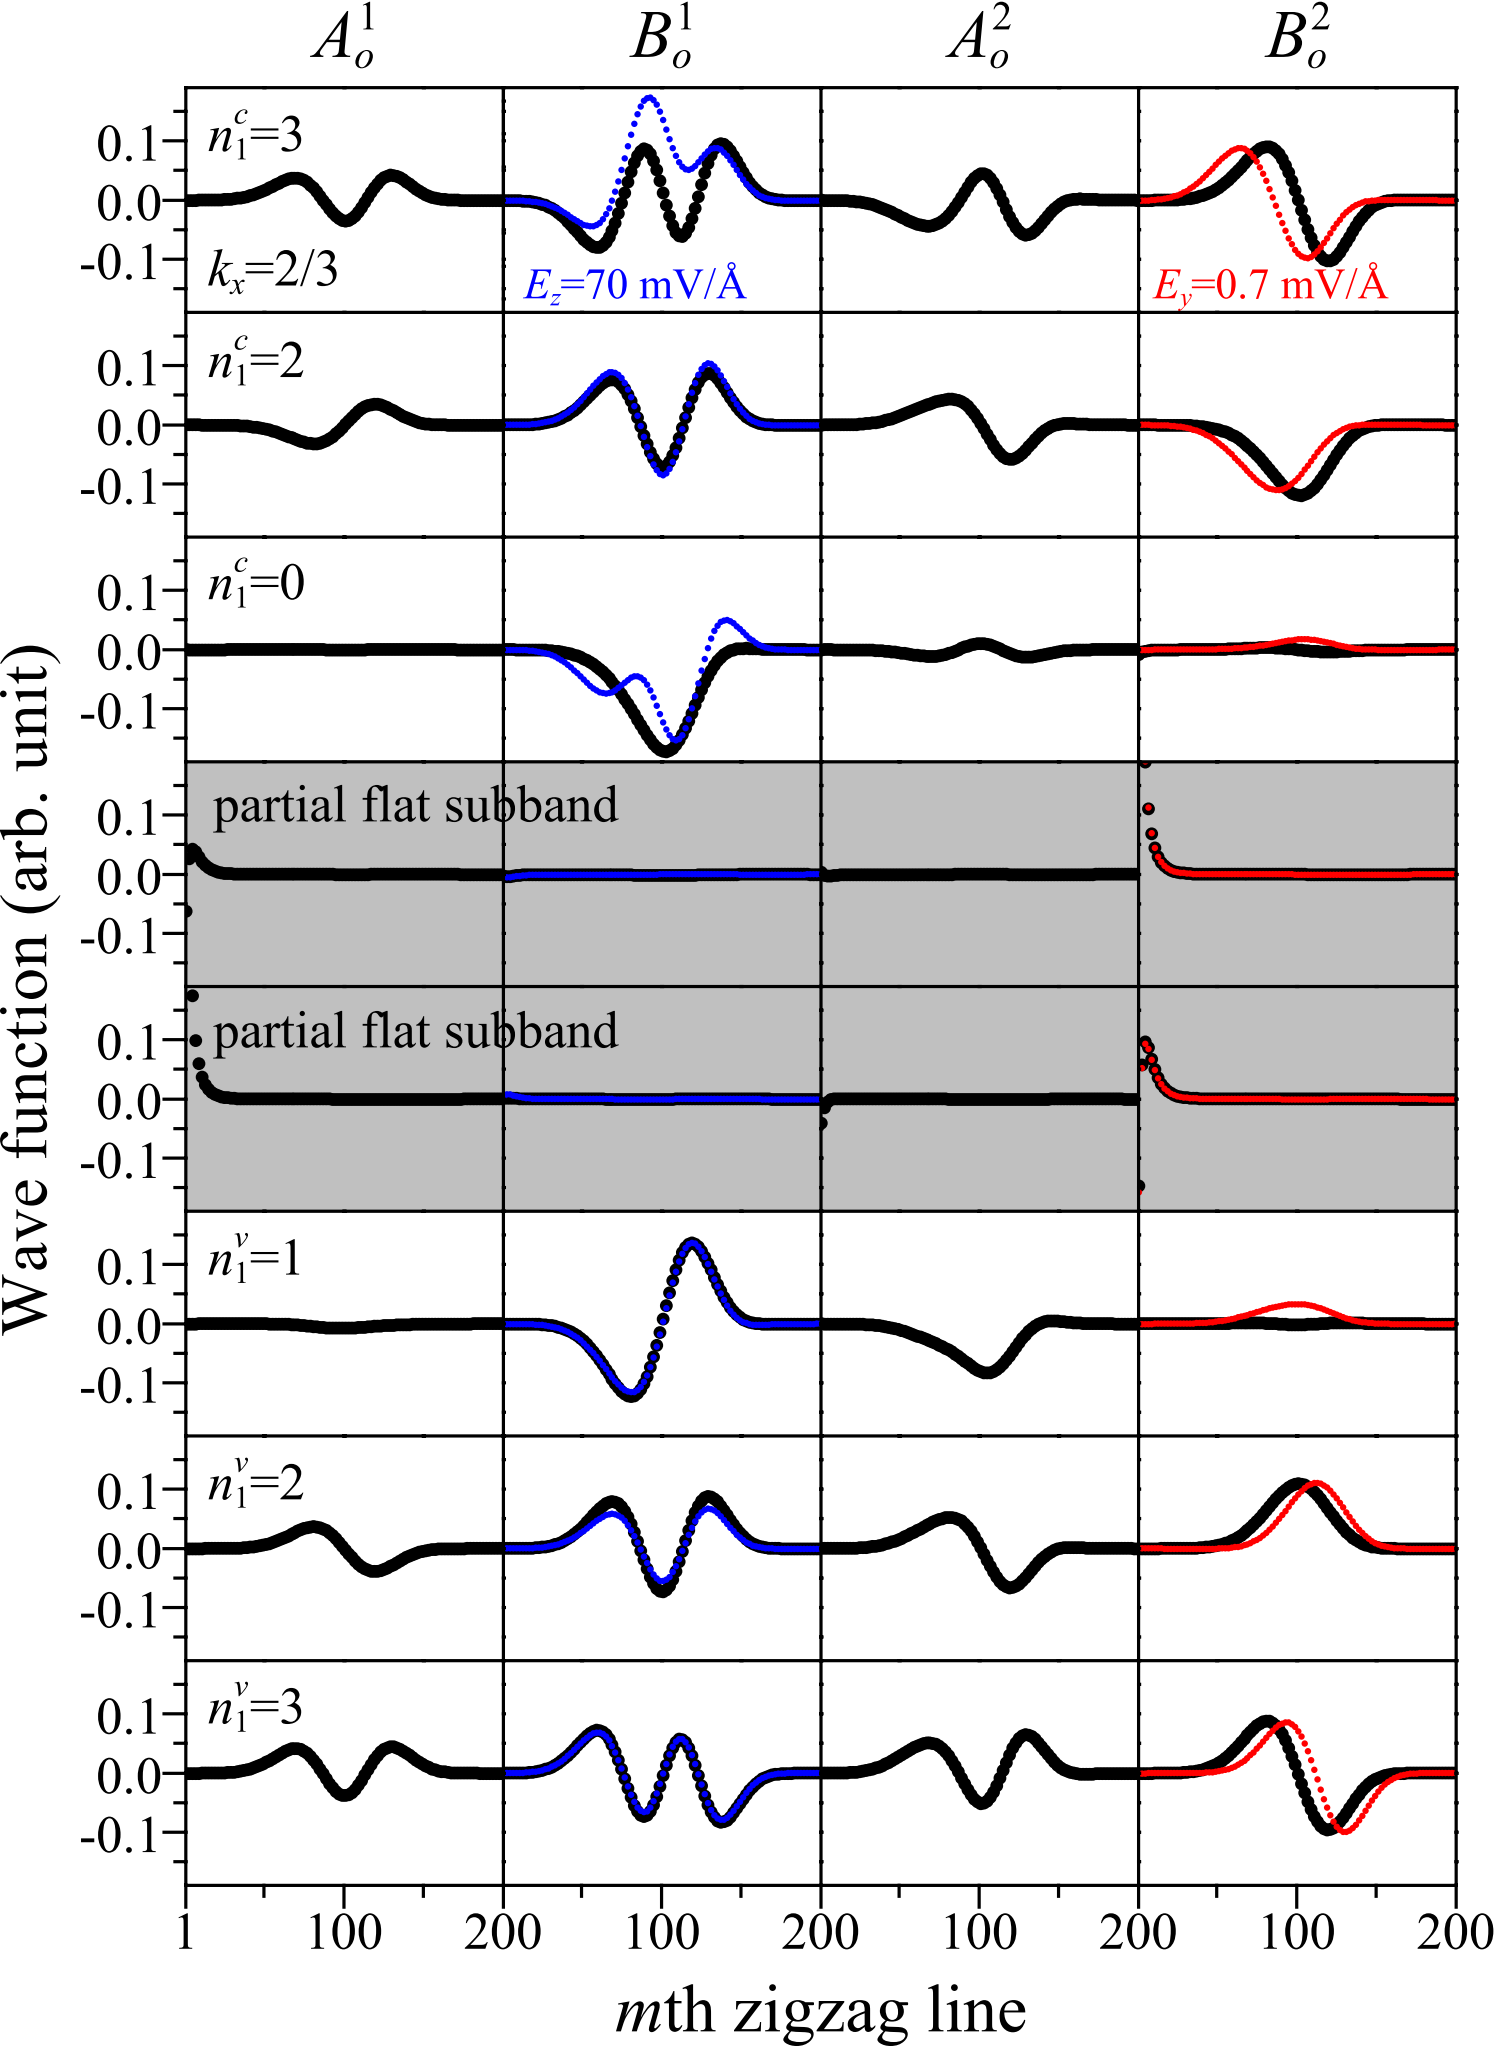

Supplement: c5cp06533j2.zip [file c5cp06533j2.zip]

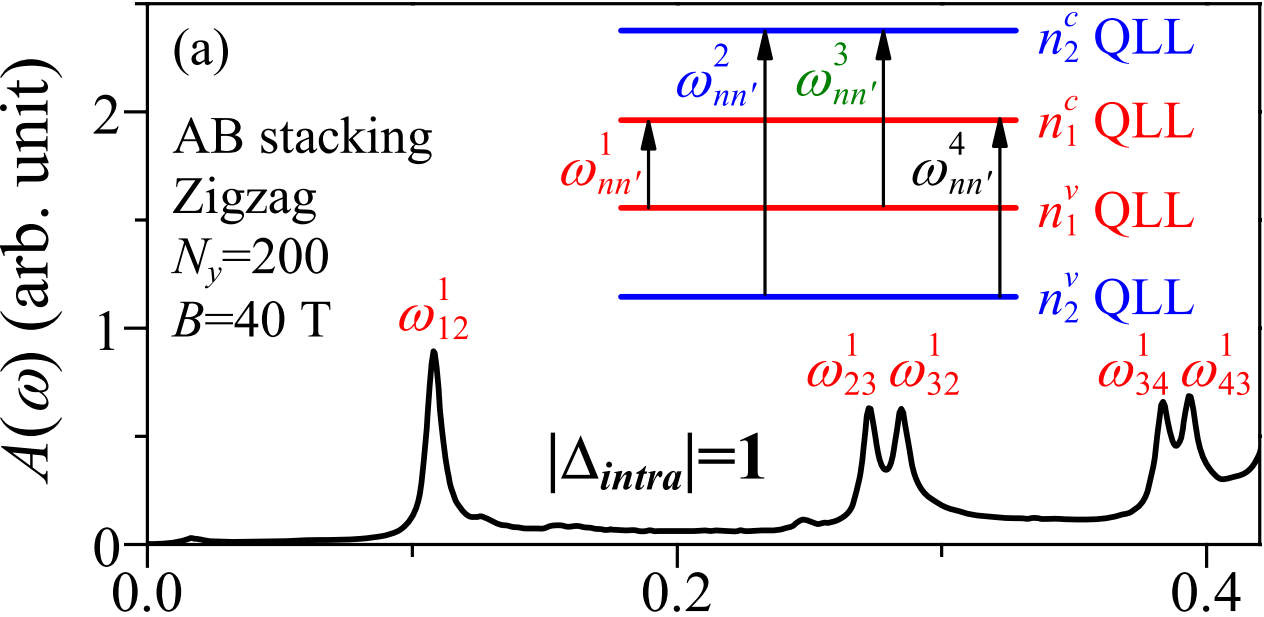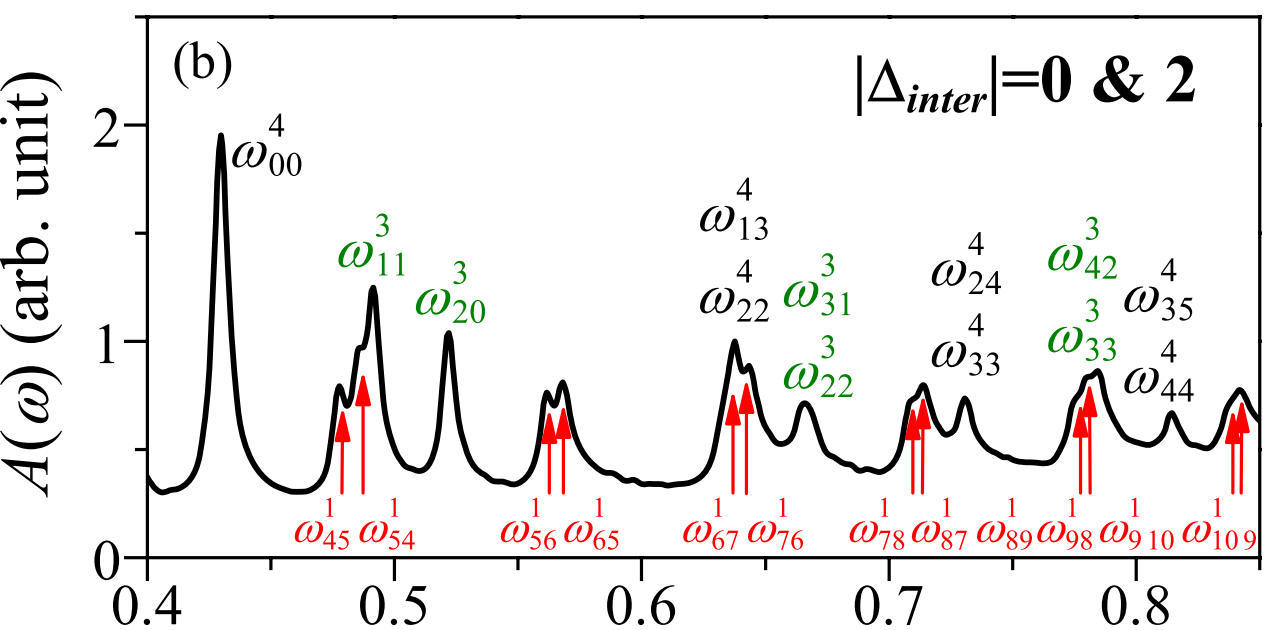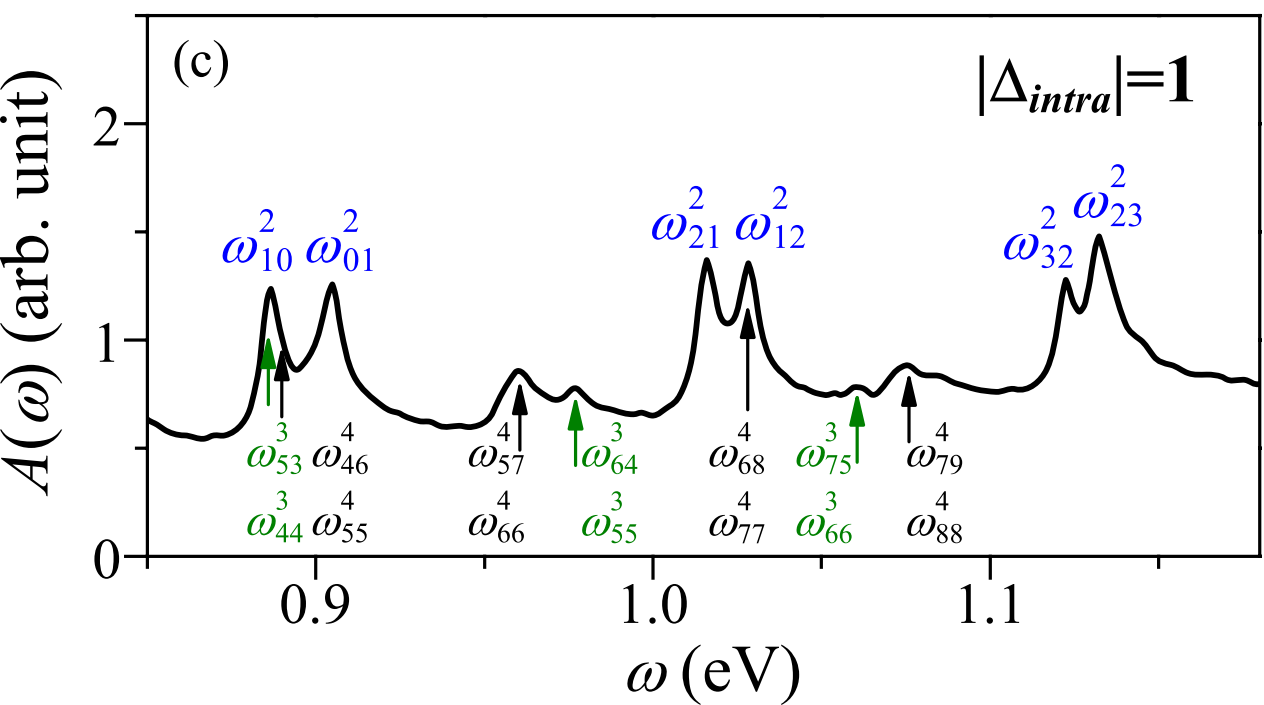

Supplement: c5cp06533j2.zip [file c5cp06533j2.zip]

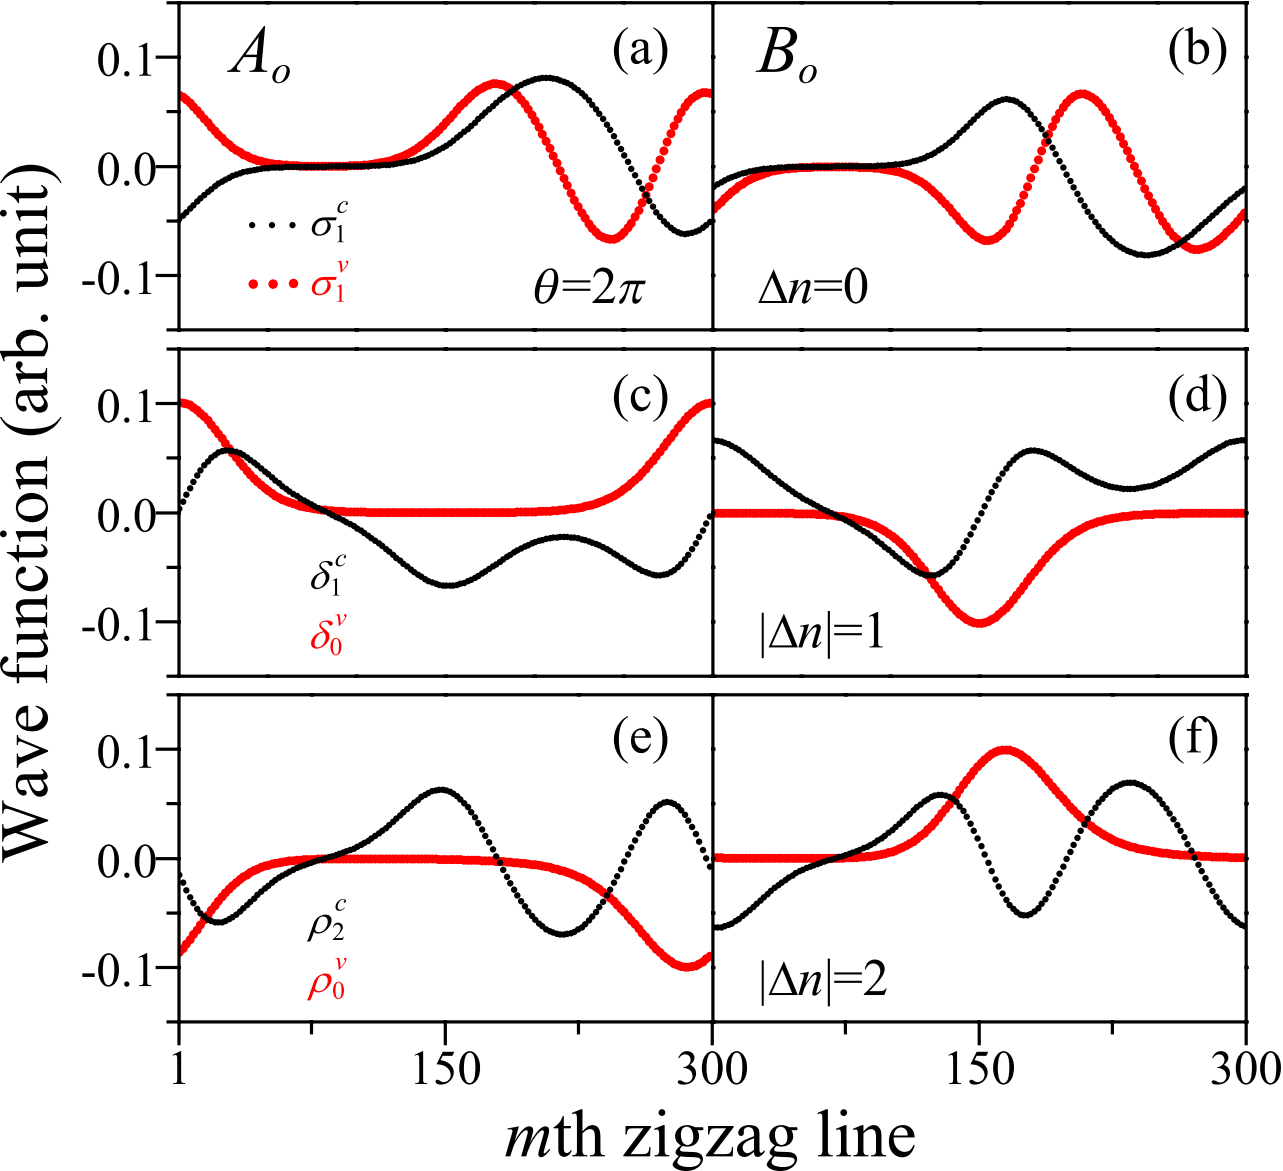

Supplement: c5cp06533j2.zip [file c5cp06533j2.zip]

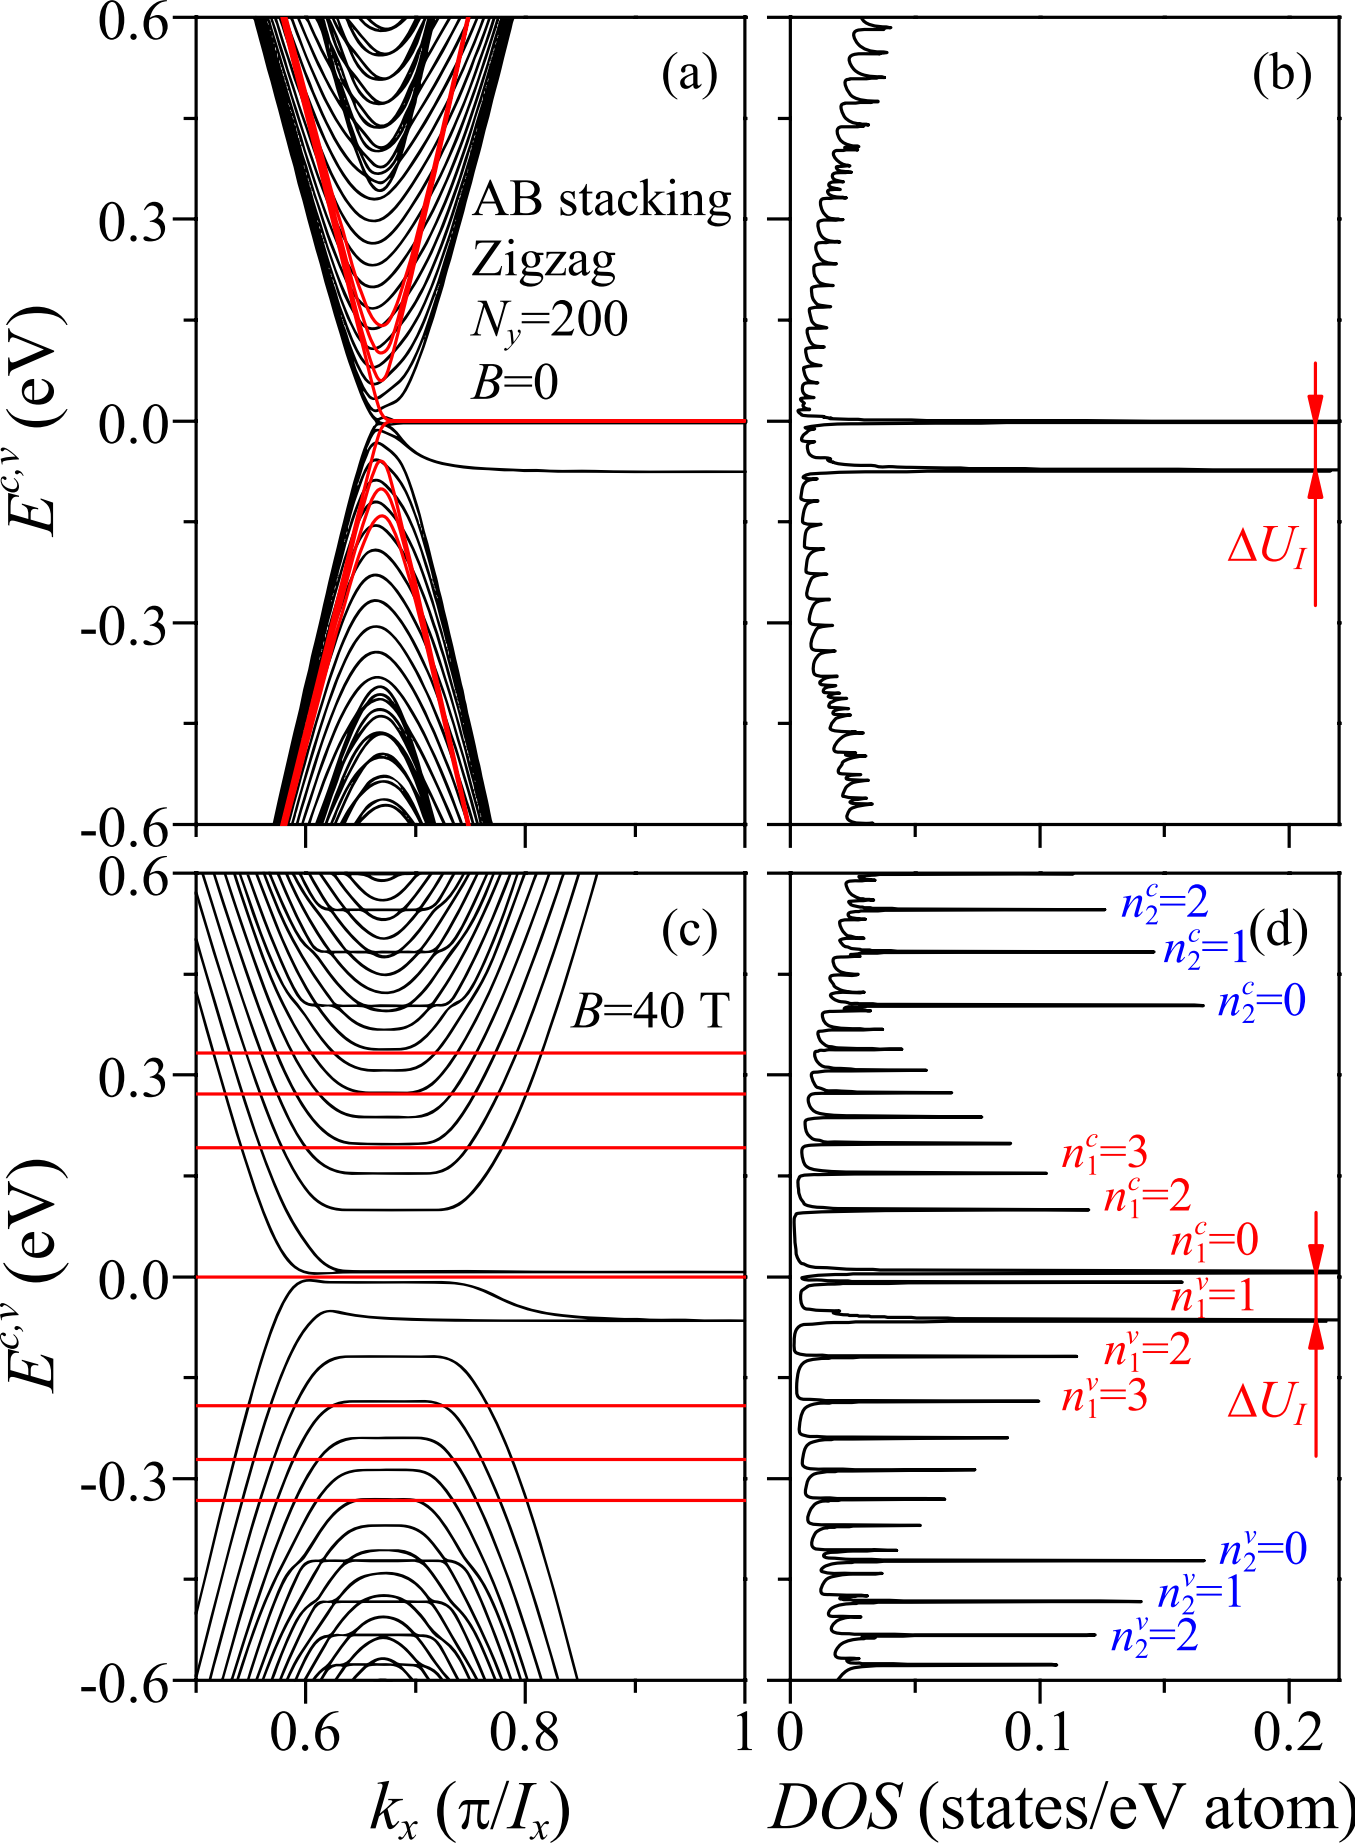

Supplement: c5cp06533j2.zip [file c5cp06533j2.zip]

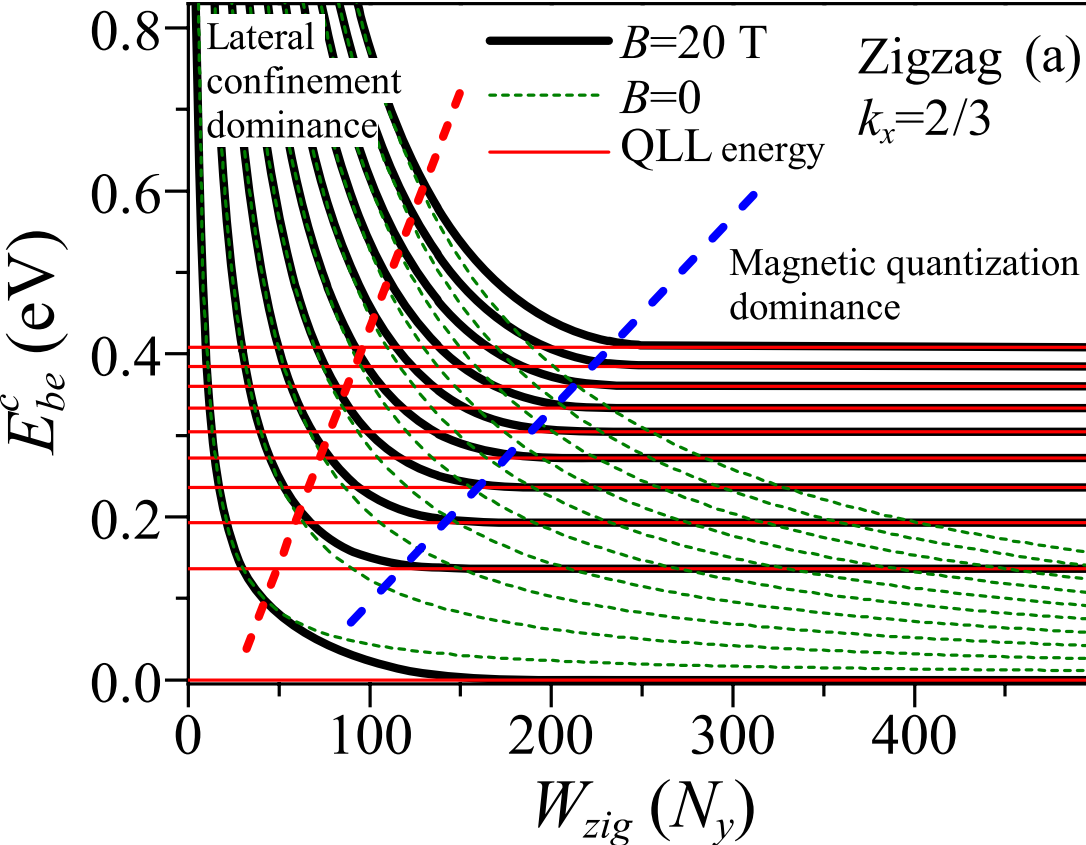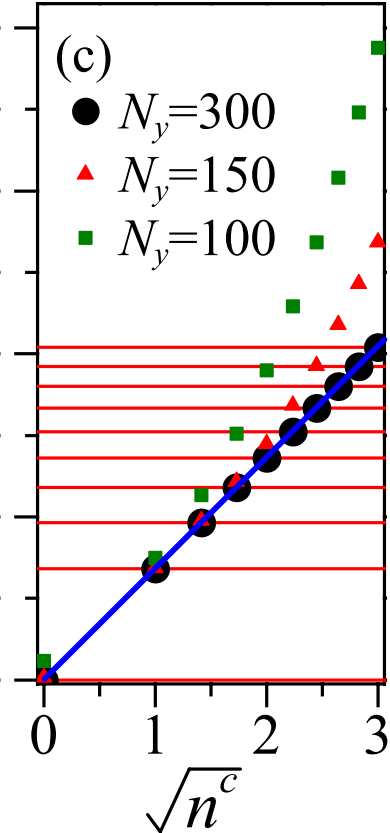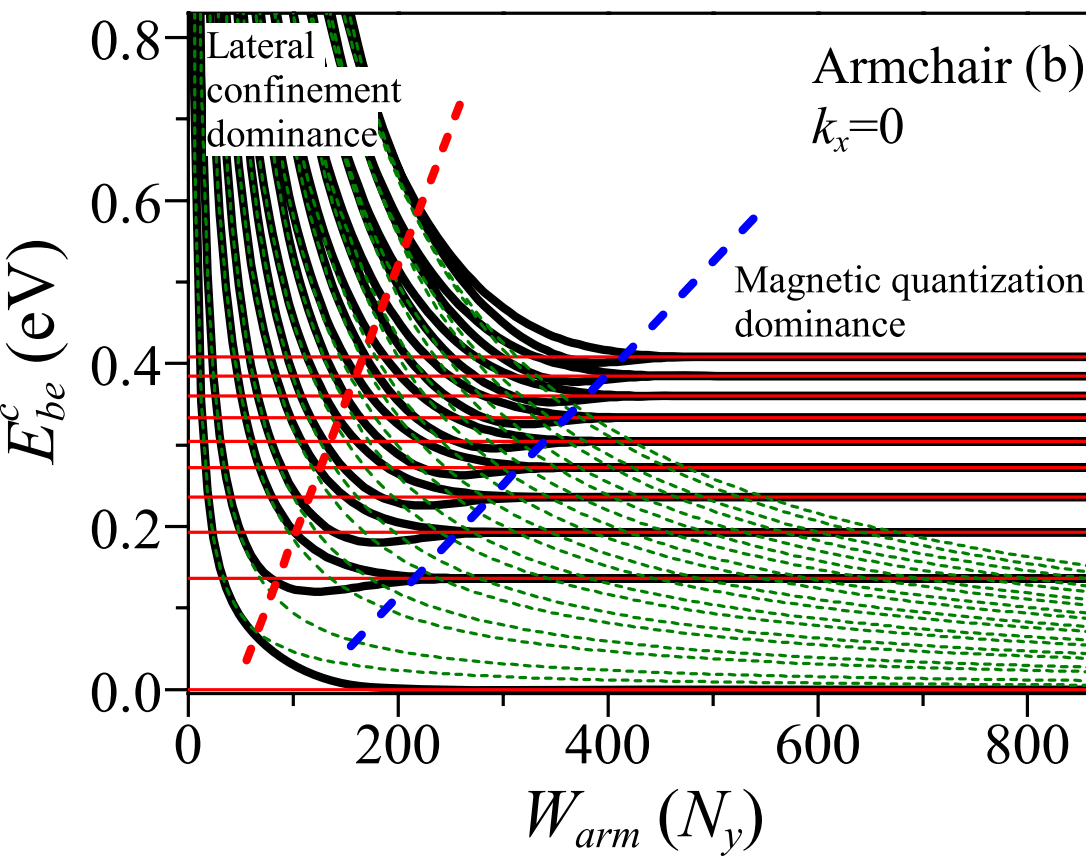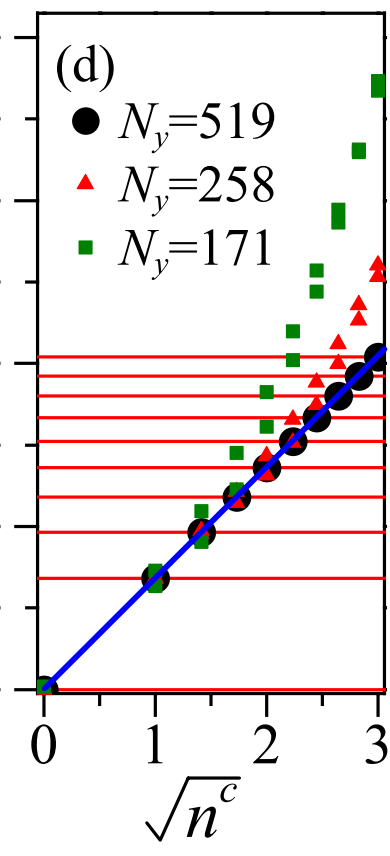

Supplement: c5cp06533j2.zip [file c5cp06533j2.zip]

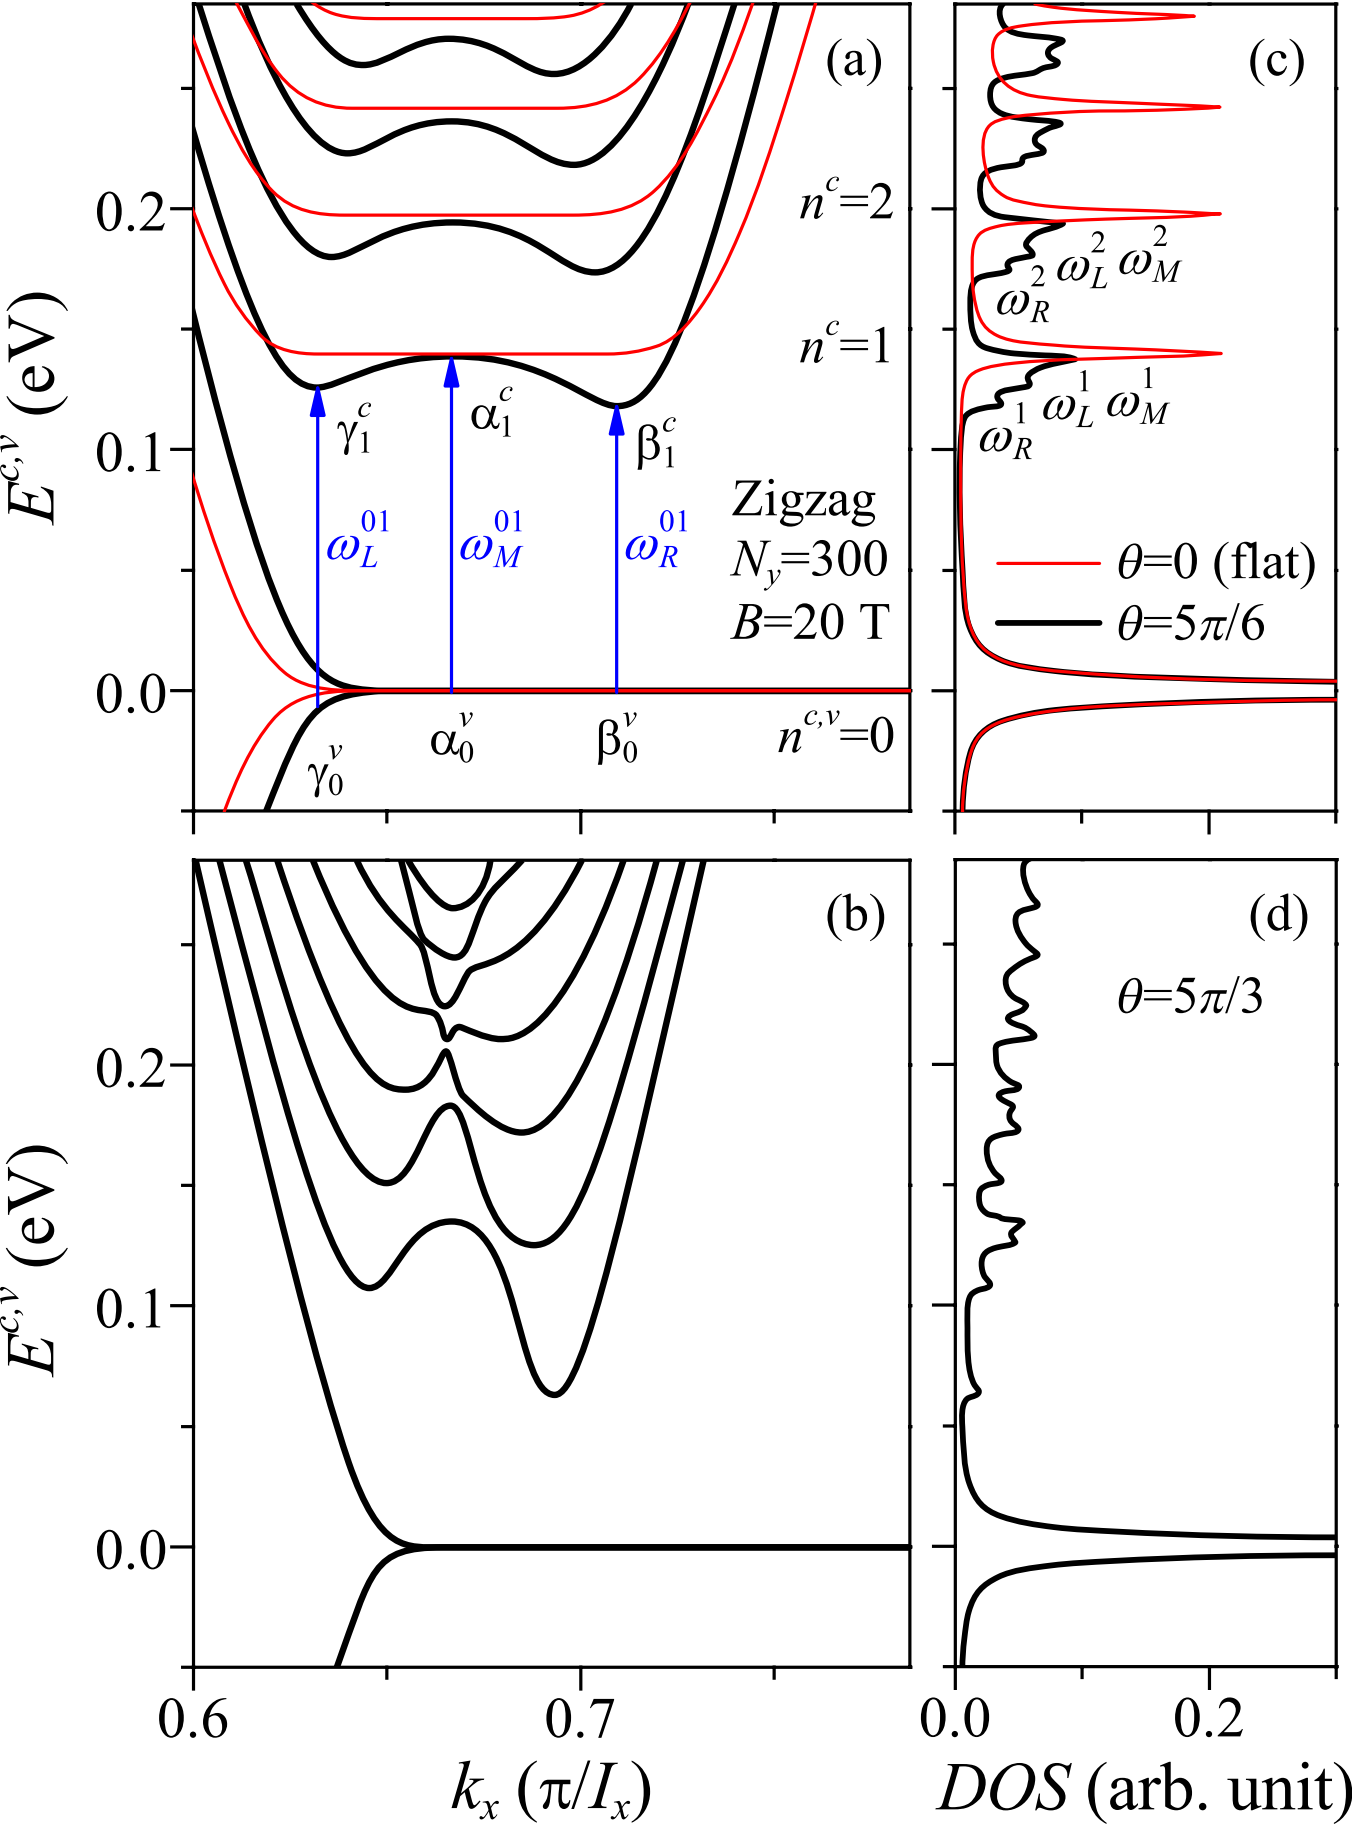

Supplement: c5cp06533j2.zip [file c5cp06533j2.zip]

Wave function (arb. unit)

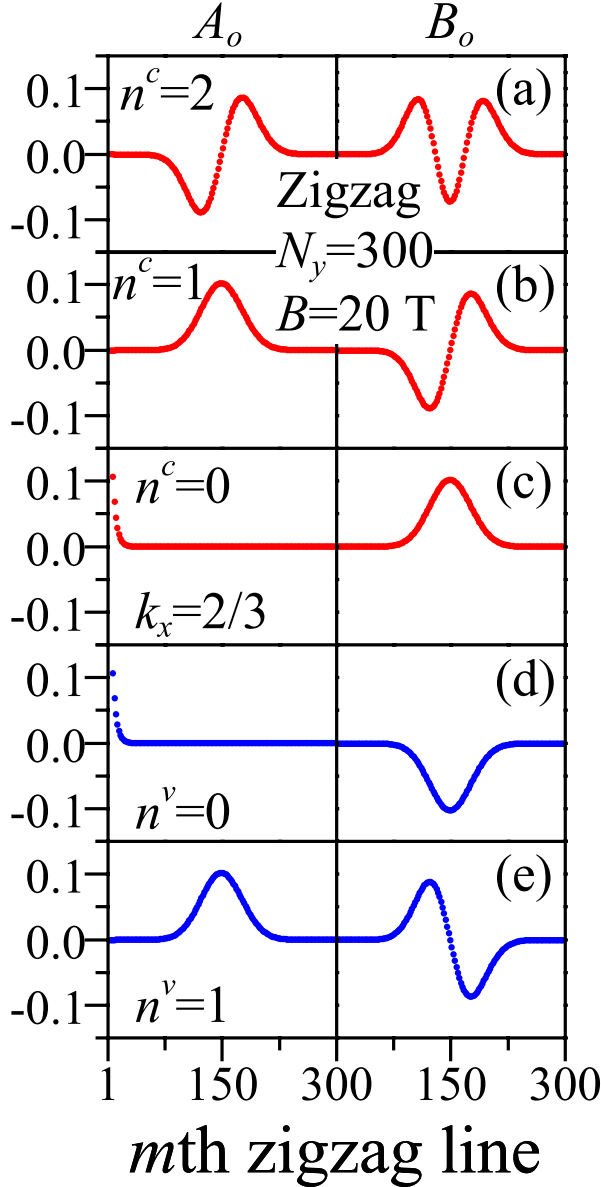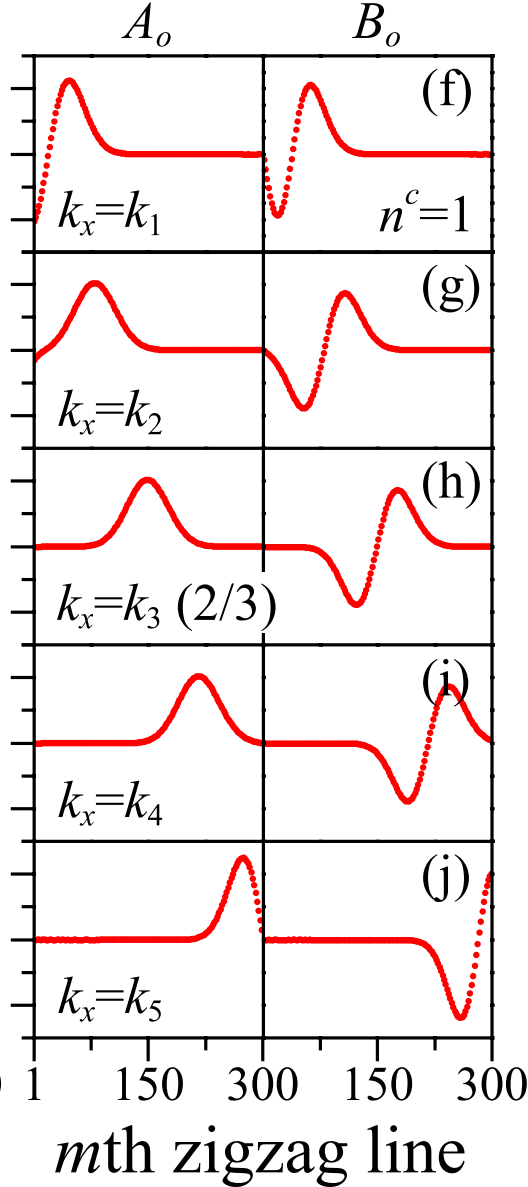

Supplement: c5cp06533j2.zip [file c5cp06533j2.zip]

(a)

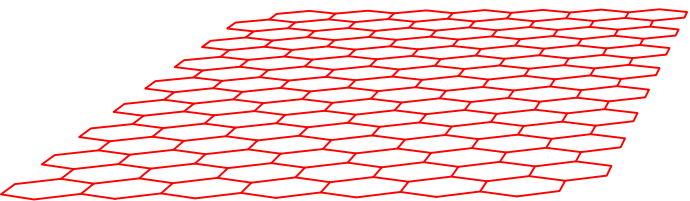

(b)

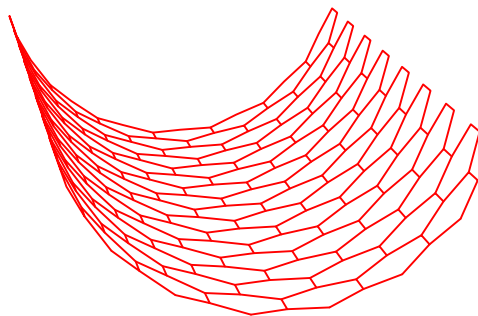

(c)

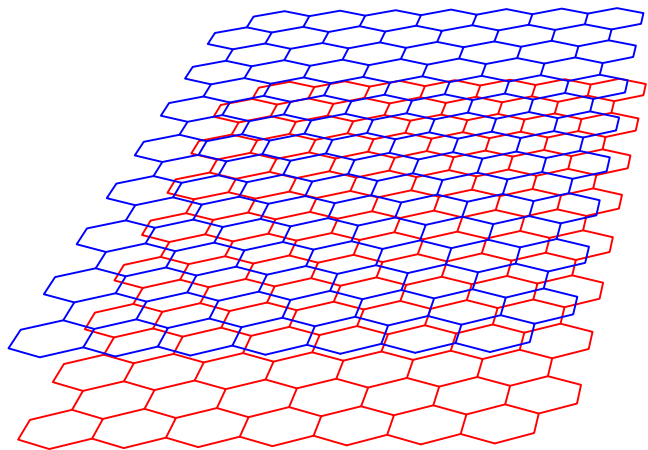

(d)

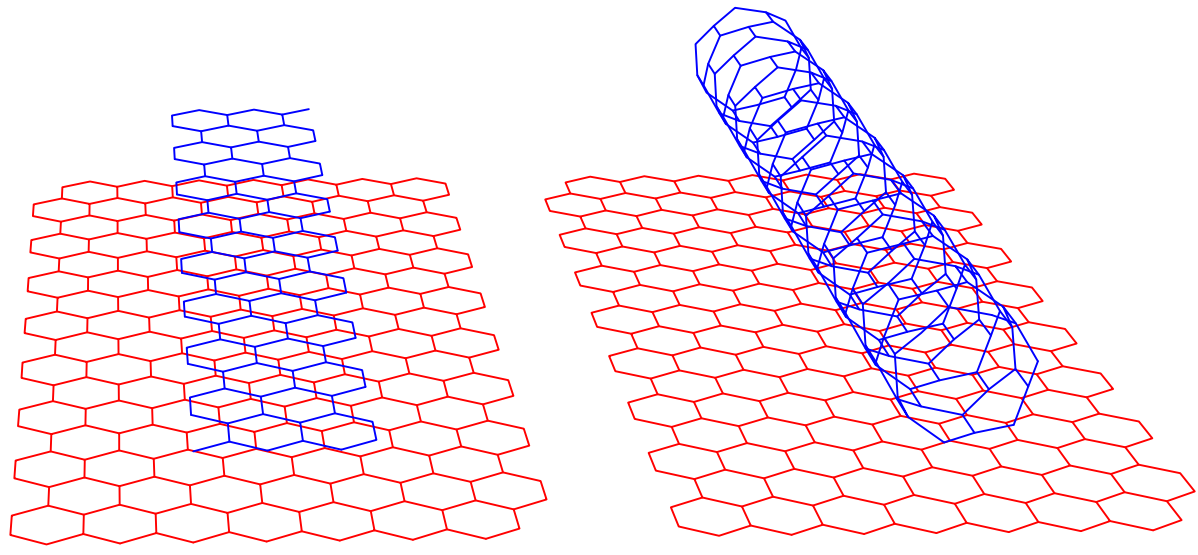

Supplement: c5cp06533j2.zip [file c5cp06533j2.zip]

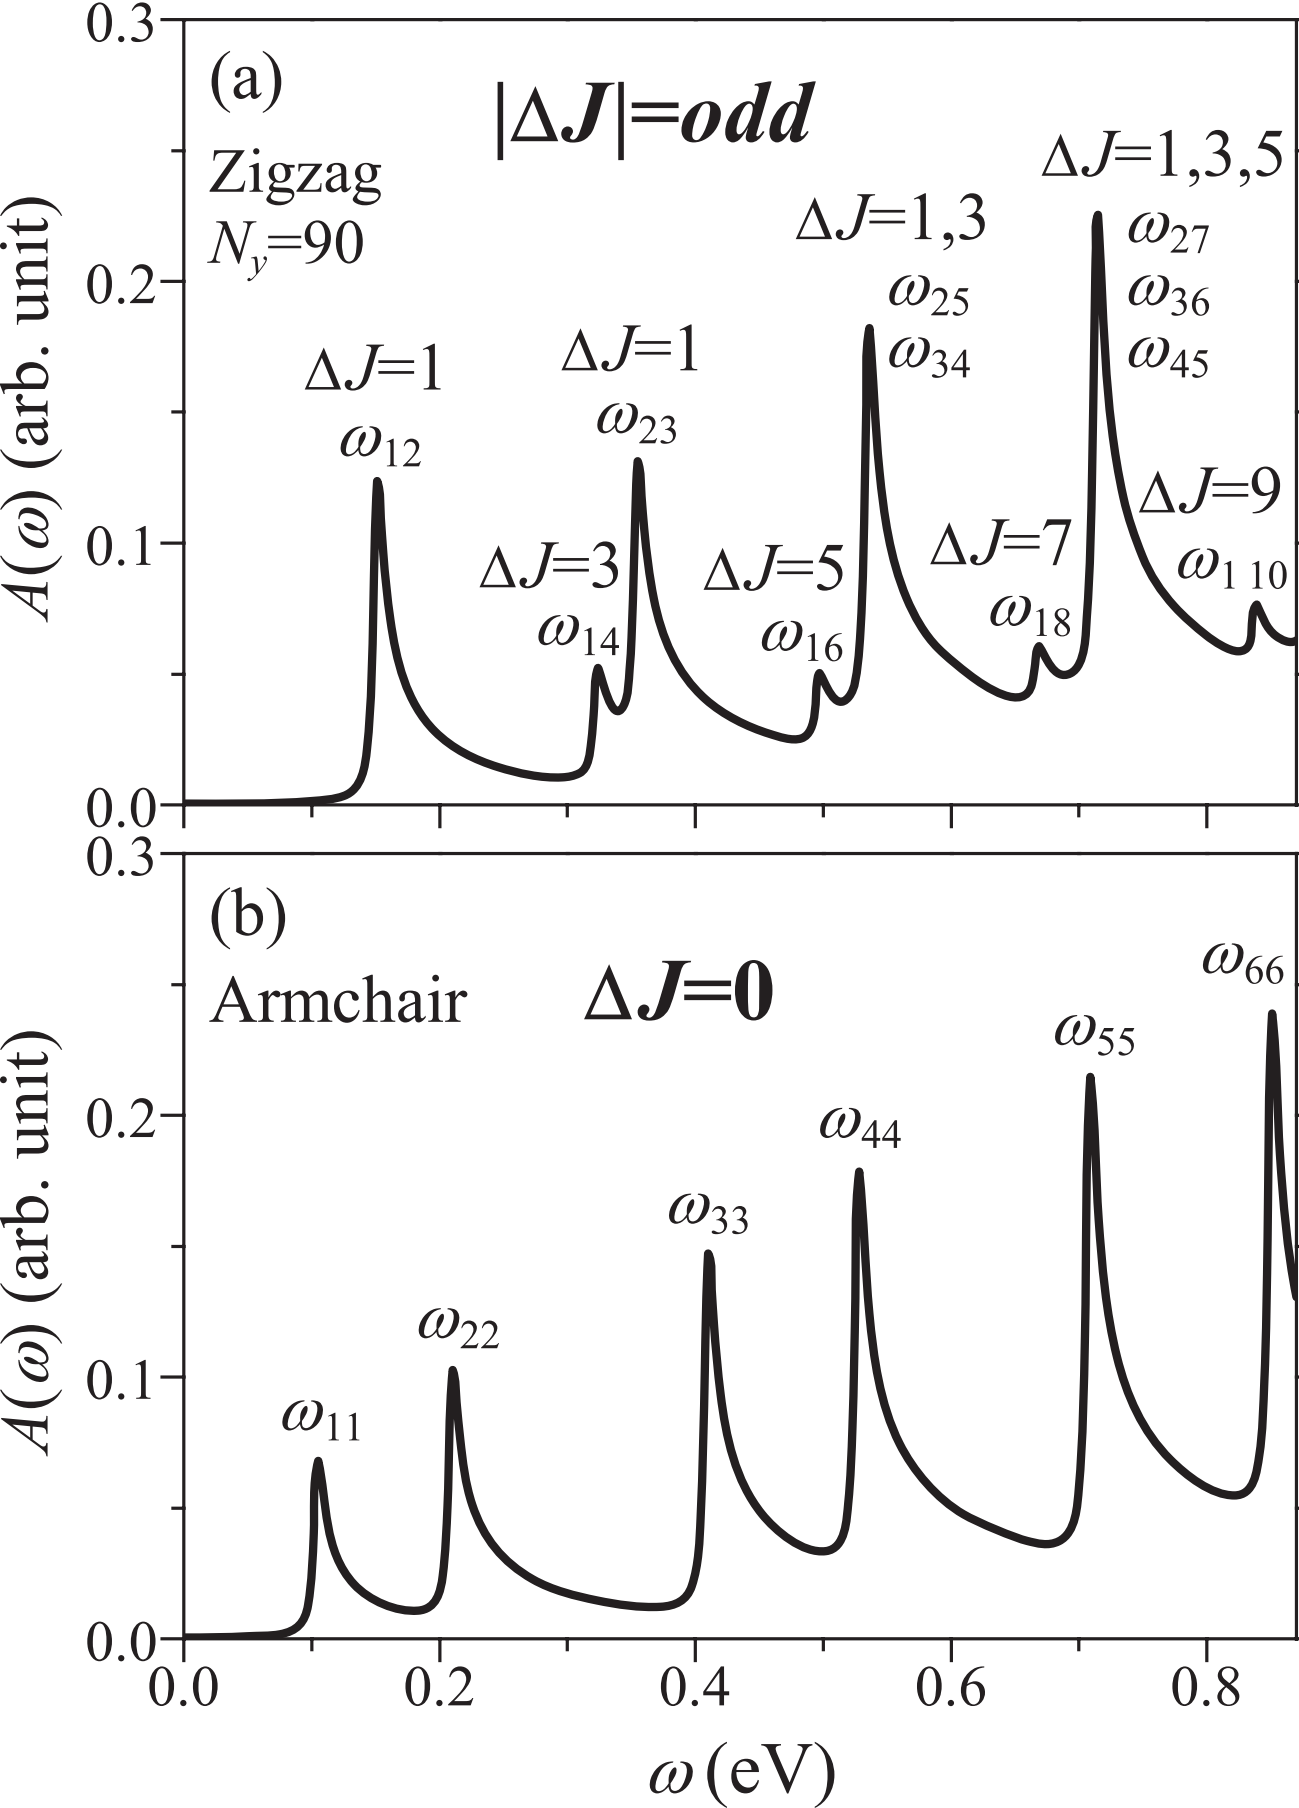

Supplement: c5cp06533j2.zip [file c5cp06533j2.zip]

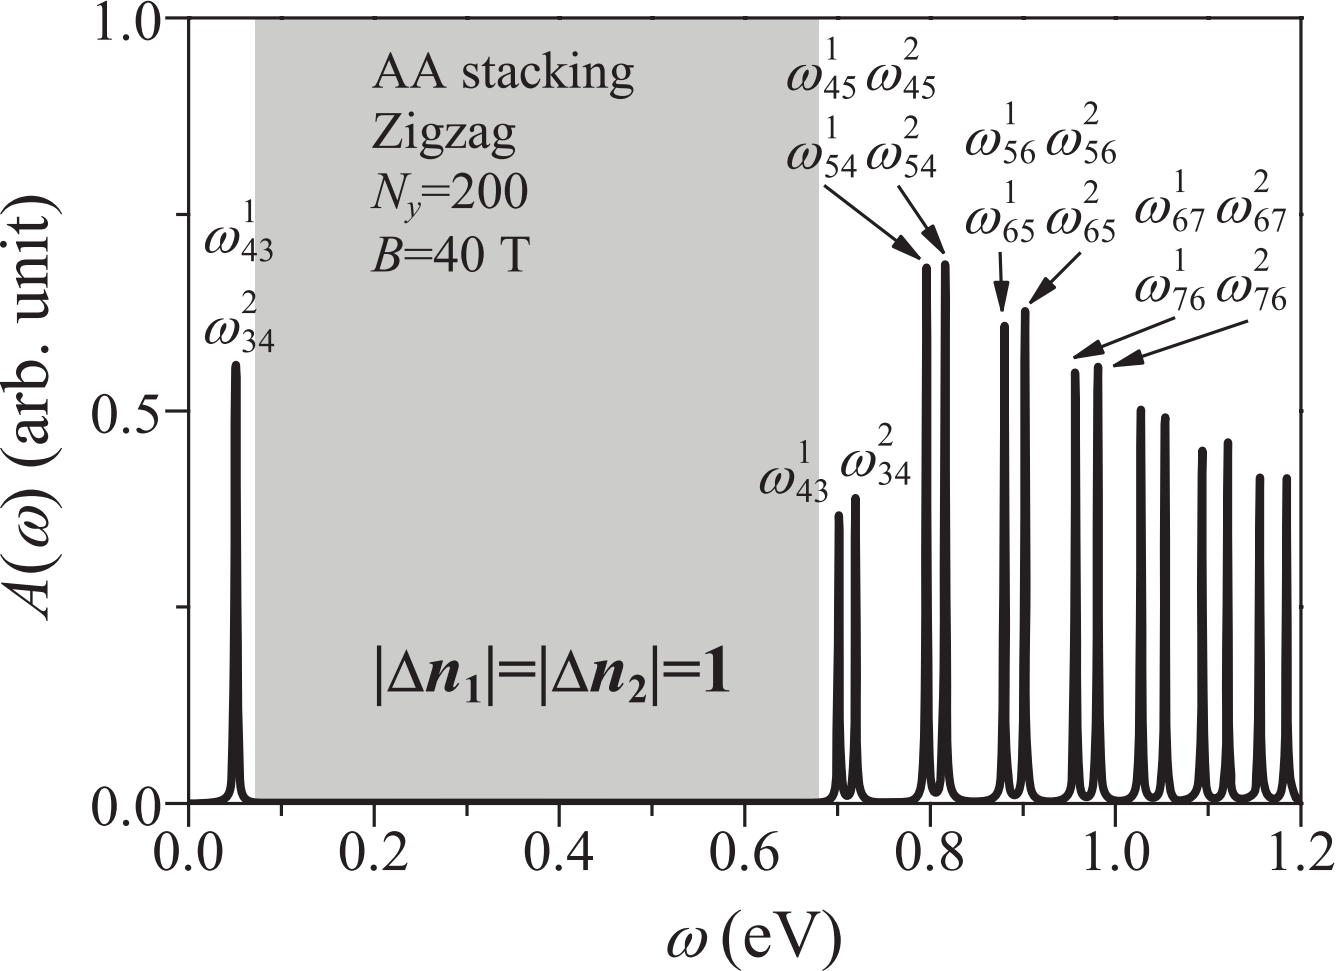

Supplement: c5cp06533j2.zip [file c5cp06533j2.zip]

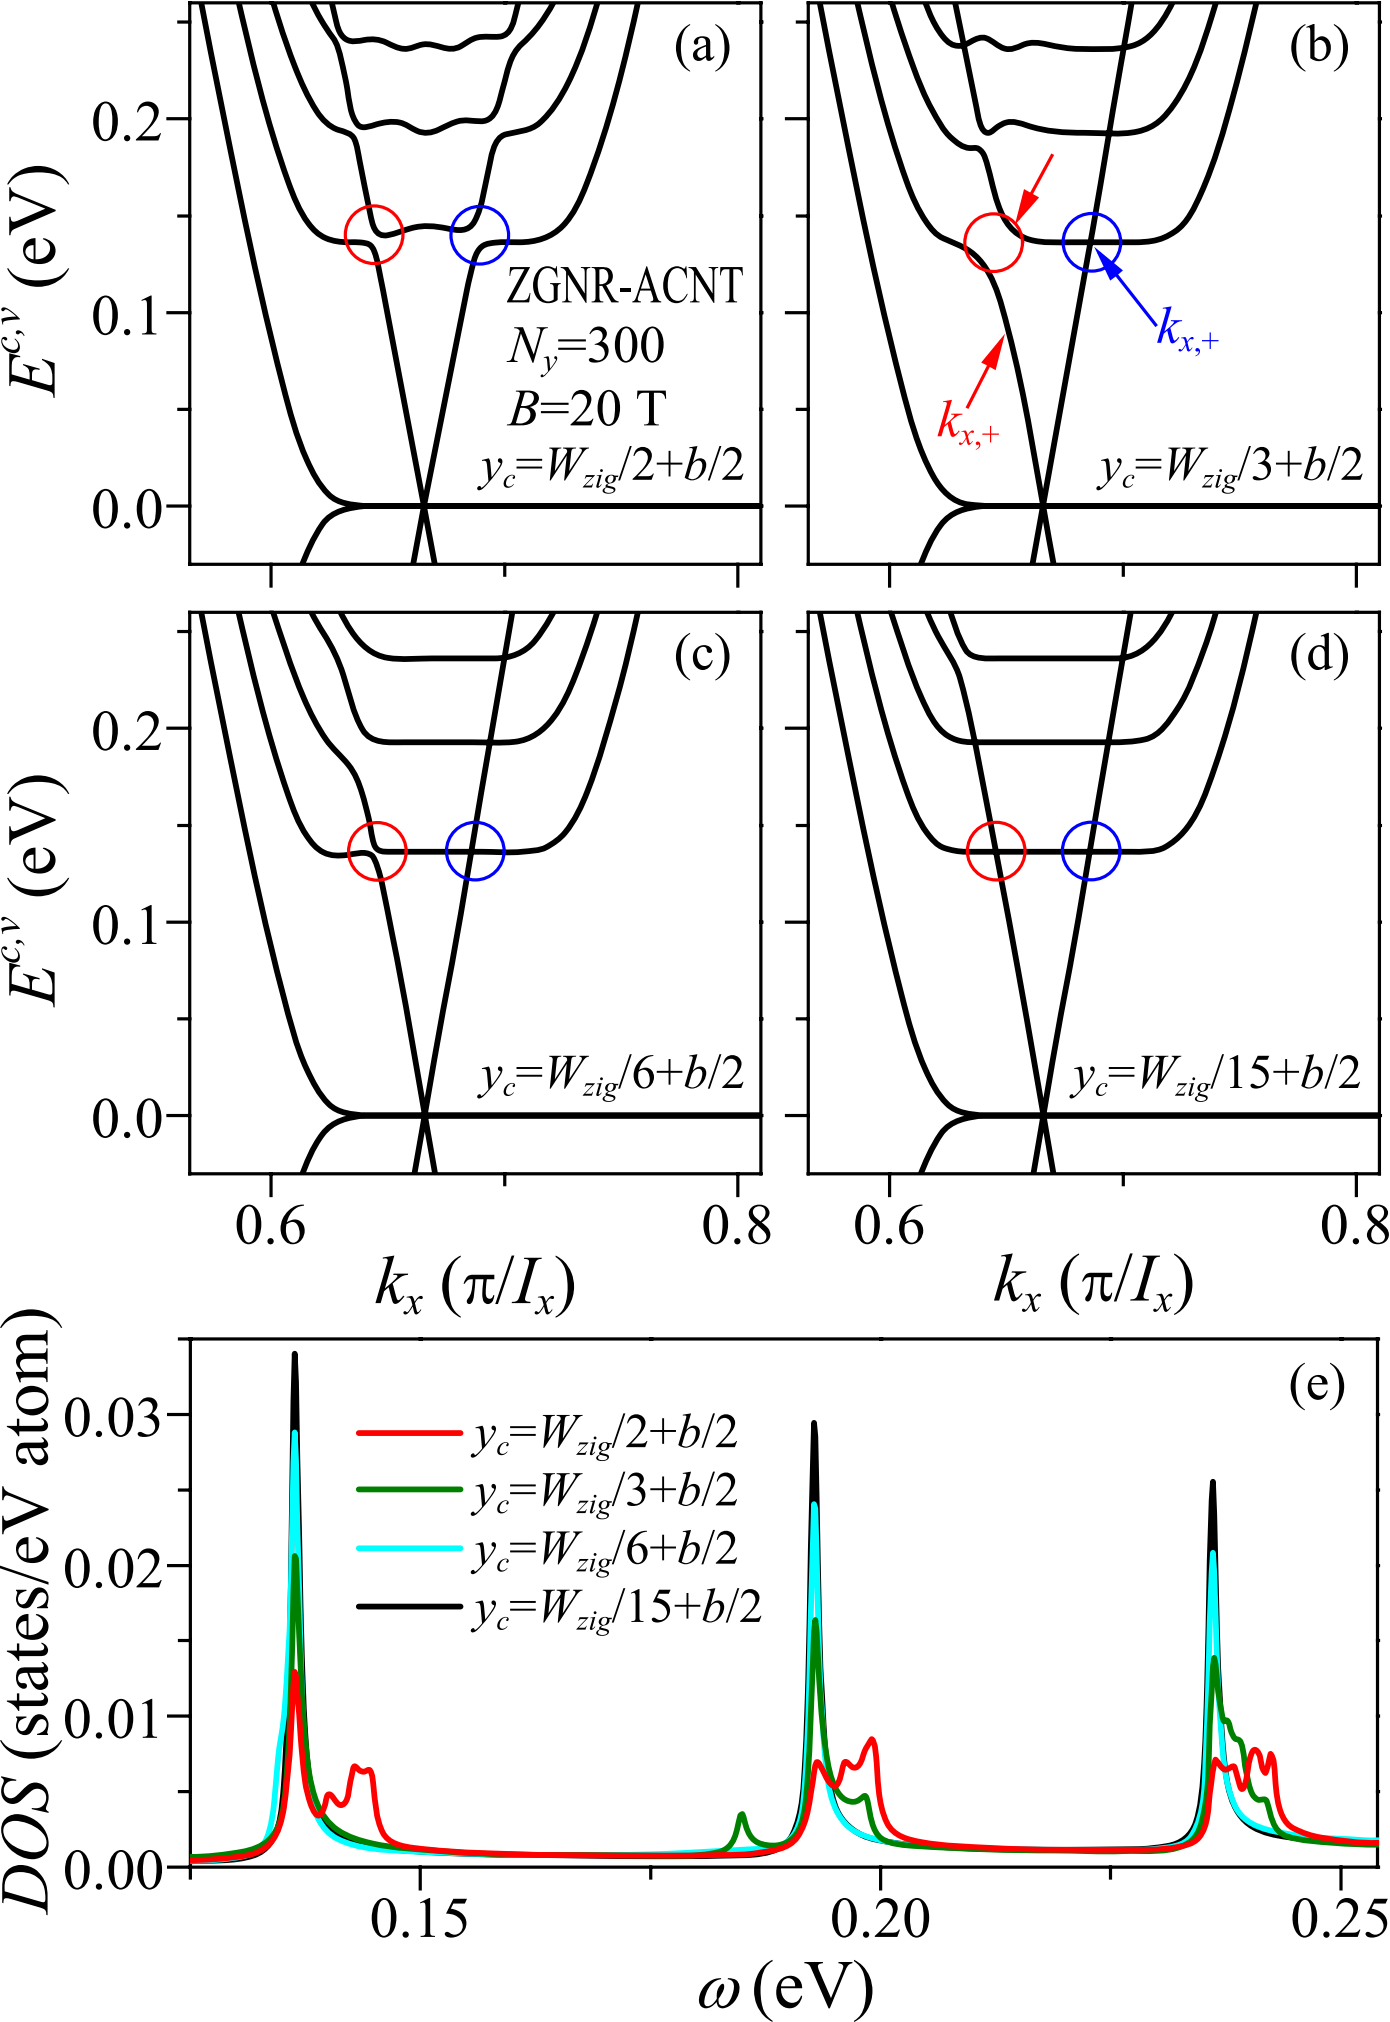

Supplement: c5cp06533j2.zip [file c5cp06533j2.zip]

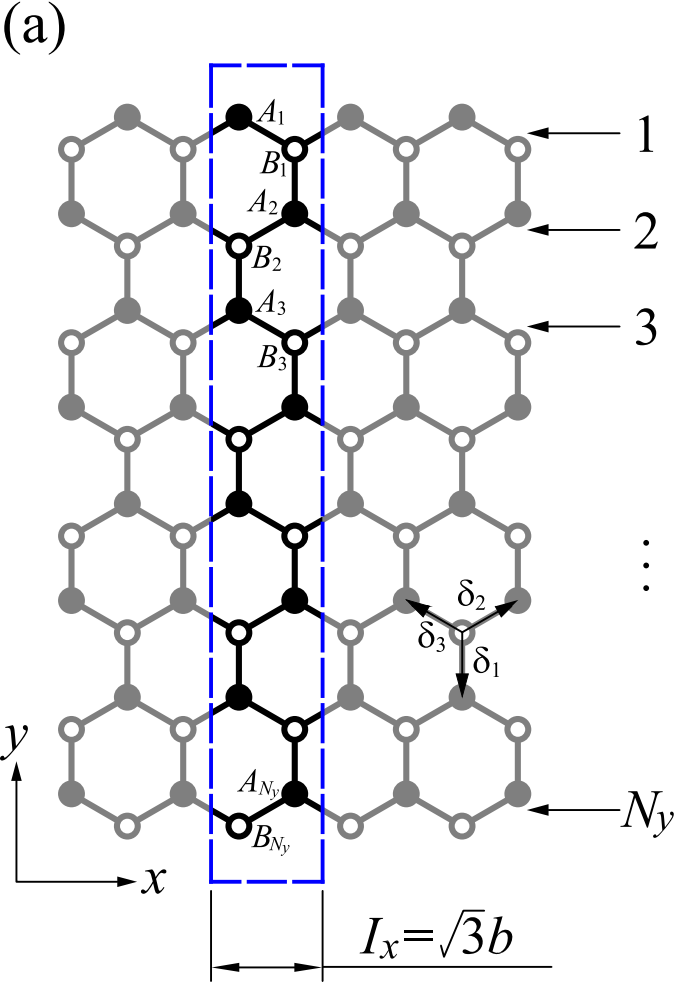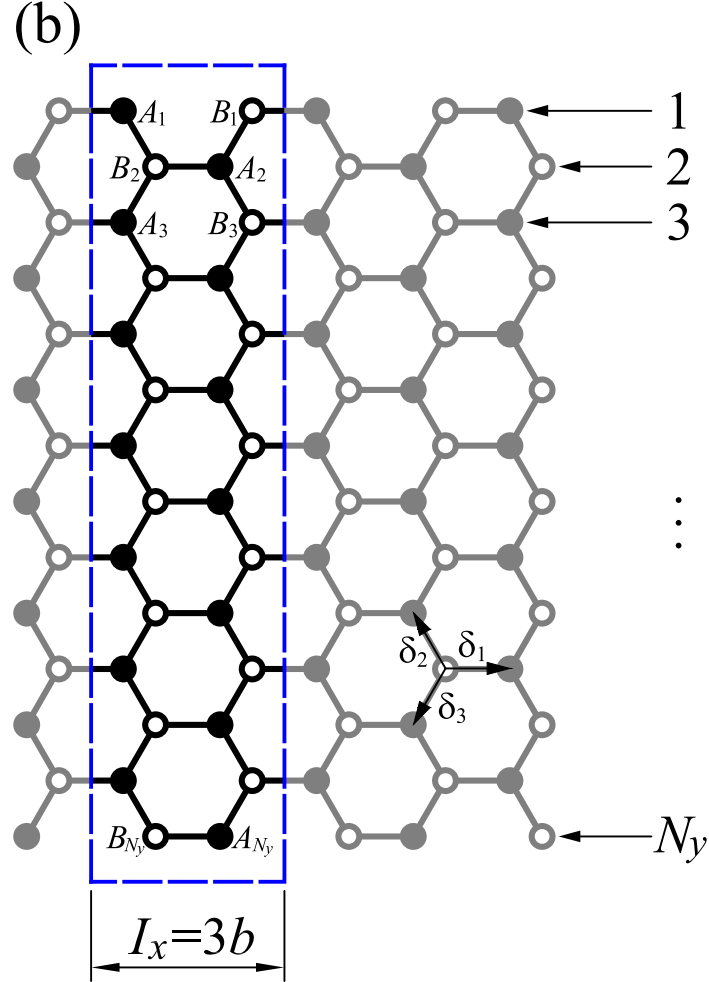

Supplement: c5cp06533j2.zip [file c5cp06533j2.zip]

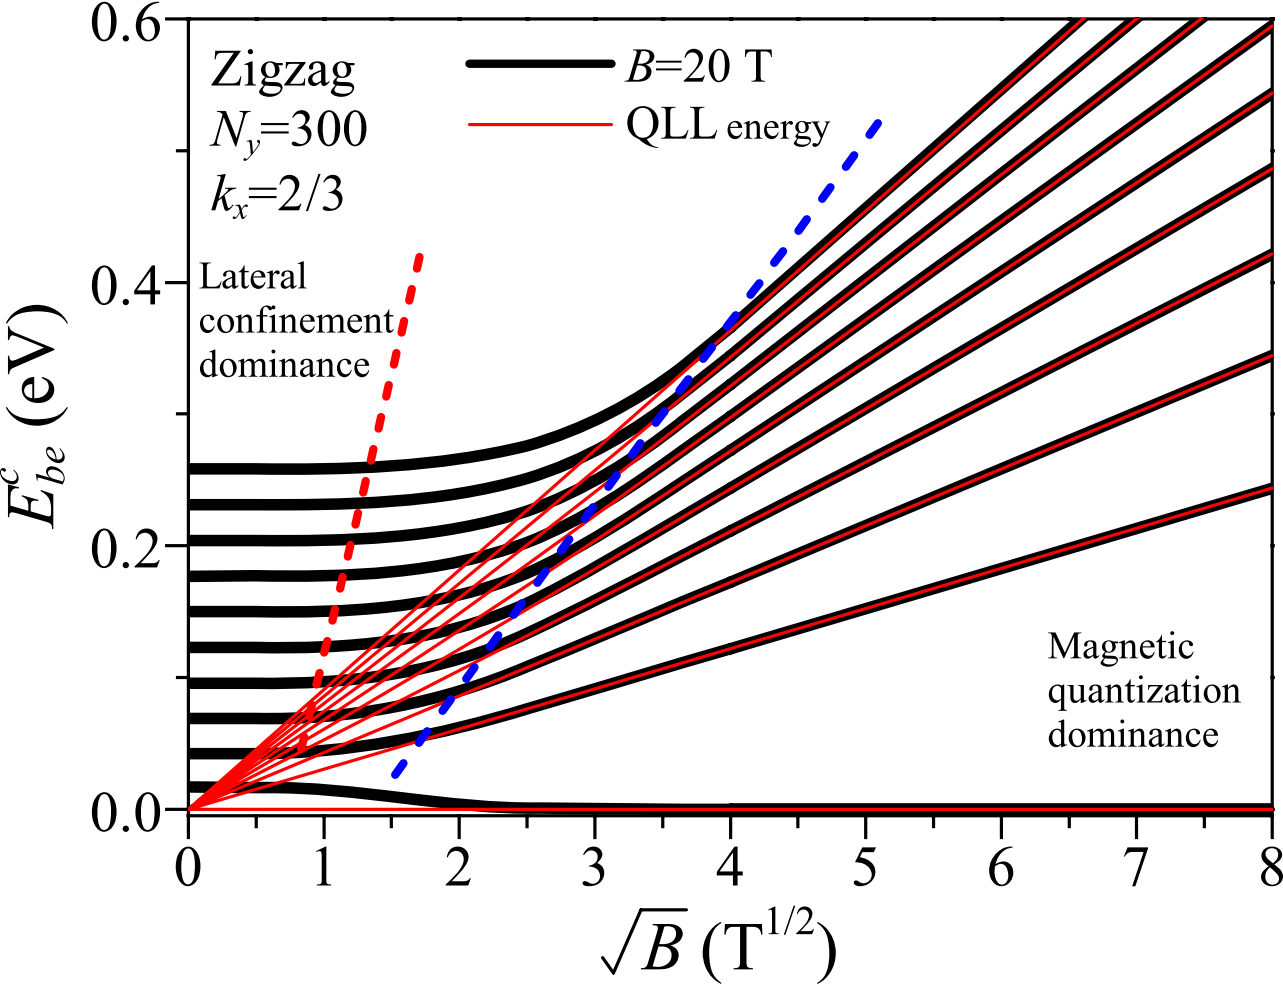

Supplement: c5cp06533j2.zip [file c5cp06533j2.zip]

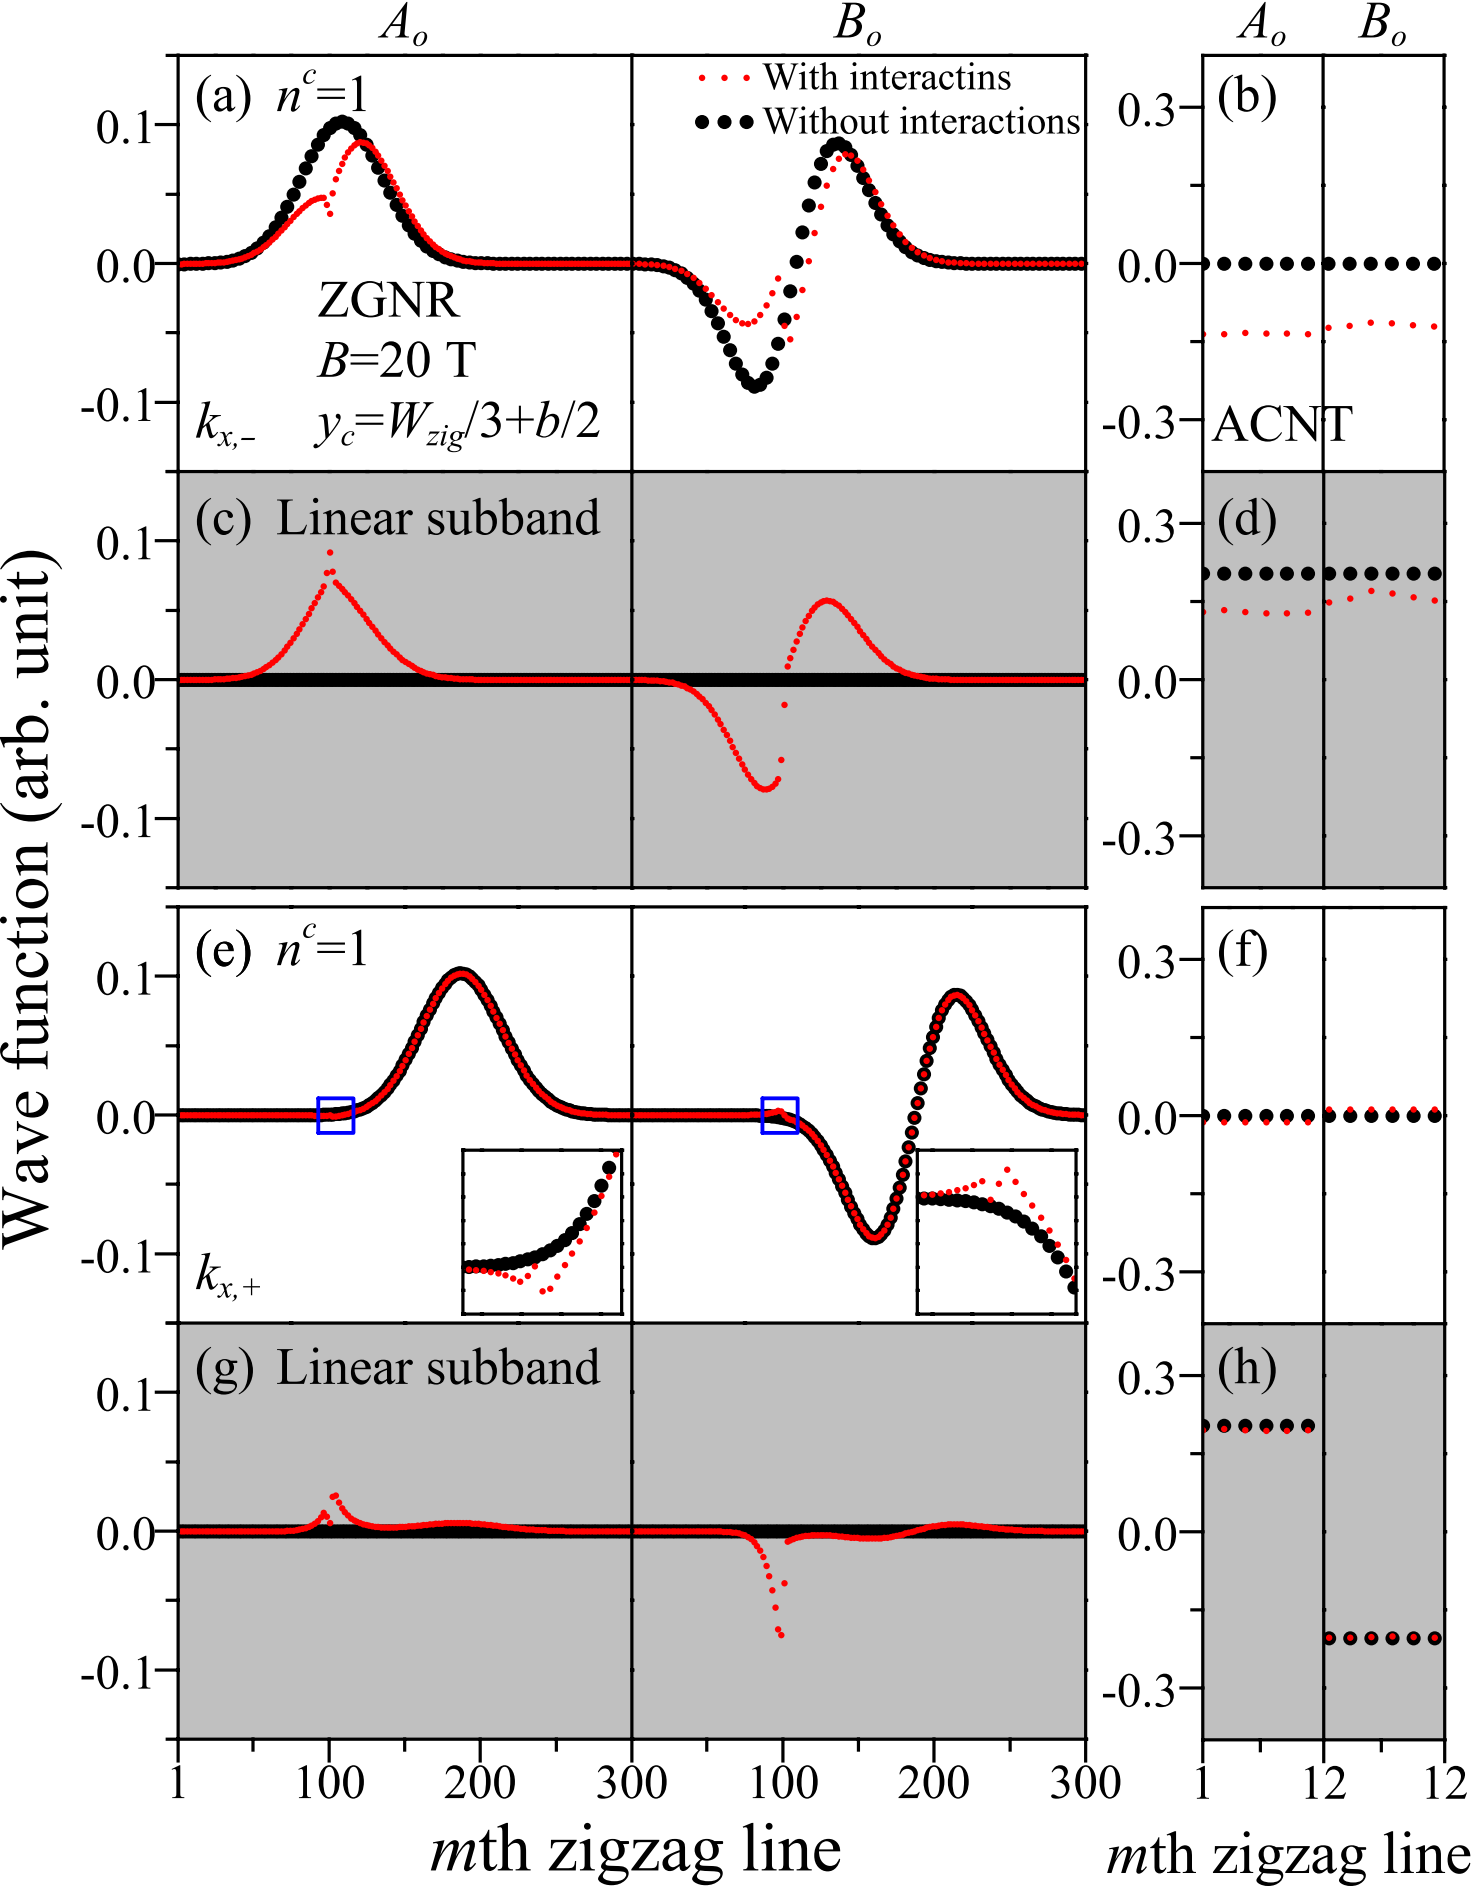

Supplement: c5cp06533j2.zip [file c5cp06533j2.zip]
